# Supplementary material for: The pharmacophylogenetic relationships of two edible medicinal plants in the genus Artemisia
Source: Front Plant Sci. 2022 Aug 18;13:949743. doi: 10.3389/fpls.2022.949743 (PMC9436419; doi:10.3389/fpls.2022.949743)
Supplement: Supplementary file 2 [file Data_Sheet_2.xlsx]

## Sheet: Table S1
Table S1 Detected metabolites using flavonoid widely targeted metabolome analyses of A. argyi and A. indica in different harvest periods
Index	Compounds	Q1 (Da)	Q3 (Da)	Molecular Weight (Da)	Formula	Ionization model	Class	CAS	ARAE1	ARAE2	ARAE3	ARAM1	ARAM2	ARAM3	ARAL1	ARAL2	ARAL3	ARIE1	ARIE2	ARIE3	ARIM1	ARIM2	ARIM3	ARIL1	ARIL2	ARIL3	mix01	mix02	mix03	kegg_map
mws0024	Gallic acid	169.01	125	170.022	C7H6O5	[M-H]-	Tannins	149-91-7	531870	403440	557650	2541500	2998500	2620400	241800	285790	277010	753440	563660	597400	3441000	5004000	4172900	167810	137840	167990	1002000	987970	1058900	--
pme0309	3-O-Methylgallic Acid	183.03	124	184.037	C8H8O5	[M-H]-	Tannins	3934-84-7	80863	65580	68705	84117	69771	93532	153000	155520	151880	25942	41969	49631	48834	70118	71465	9	9	9	68655	54939	59793	--
mws0040	Chrysin	255.07	153	254.058	C15H10O4	[M+H]+	Flavonoids	480-40-0	128620	133230	147400	300620	263710	361380	301870	133100	186230	104450	75366	82673	285530	465280	363080	232430	246940	211970	203190	201030	194210	ko00941
mws0789	Pinocembrin (Dihydrochrysin)	255.07	151	256.074	C15H12O4	[M-H]-	Flavonoids	480-39-7	51053	50411	49685	105100	100390	128710	110450	63577	97382	37106	34980	35797	90367	127970	114910	80753	76905	55611	66677	68780	67907	ko00941
Lmqn001795	5-Hydroxy-7-methoxyflavone	267.07	249.05	268.074	C16H12O4	[M-H]-	Flavonoids	-	58933	74506	77320	22995	30997	24620	138590	131460	285600	46404	52262	38741	83165	149100	127300	320420	283610	334120	131990	94051	92266	--
mws1662	Tectochrysin	269.08	226	268.074	C16H12O4	[M+H]+	Flavonoids	520-28-5	40447	39020	42968	95615	87543	136560	93430	34986	56266	27349	24839	24567	103980	149610	133350	75735	85601	62947	68548	68426	68797	--
mws0063	Genistein	271.06	215.07	270.053	C15H10O5	[M+H]+	Flavonoids	446-72-0	16856	13329	18716	30402	33421	22746	20150	19989	27766	20914	13473	16161	23801	23230	17825	51367	59725	51623	27723	24195	25992	ko00943,ko01100,ko01110
pmp000571	Apigenin	271.06	153.01	270.053	C15H10O5	[M+H]+	Flavonoids	520-36-5	431430	327580	464590	831290	857690	637200	543600	590900	690790	642170	402400	496990	710900	856520	557730	1514100	1929900	1559100	654260	654540	649240	ko00941,ko00943,ko00944,ko01100,ko01110
pmp000344	3',4',7-Trihydroxyflavone	271.06	243.06	270.053	C15H10O5	[M+H]+	Flavonoids	2150-11-0	22037	21138	31774	50649	52116	29225	31821	32696	31348	33703	23582	27166	35665	49463	40706	93176	110420	90635	41743	37724	36355	--
Lmyn006227	Galangin (3,5,7-Trihydroxyflavone)	269.05	151	270.053	C15H10O5	[M-H]-	Flavonoids	548-83-4	634630	508170	715640	1248900	1221700	990430	932620	956970	1028400	975470	627830	838440	1041500	1129500	810920	2544000	2881000	2300000	1108500	1082600	1034200	ko00941
pme0376	Naringenin (5,7,4'-Trihydroxyflavanone)	271.06	151	272.068	C15H12O5	[M-H]-	Flavonoids	480-41-1	1072900	731780	892580	2506400	3144900	2683600	9525200	10096000	14186000	485420	374630	429400	559720	582640	523410	873410	732420	700640	2975700	2860400	2958700	ko00941,ko00943,ko01100,ko01110
pme2960	Naringenin chalcone	273.08	153	272.068	C15H12O5	[M+H]+	Flavonoids	73692-50-9	978620	680920	811380	1935900	2444900	2087200	7039400	7492200	9680000	429740	367970	415830	492350	521970	458760	580540	497820	510090	2554800	2377400	2589300	ko00941,ko01100,ko01110
mws0914	Pinobanksin	271.06	151	272.068	C15H12O5	[M-H]-	Flavonoids	548-82-3	1082300	721840	900140	2354600	3149900	2538200	9372200	9940200	14318000	480790	374870	452010	582790	620780	518980	868340	729430	700430	2950100	2951200	2896300	ko00941
pme3475	Butin	273.08	153	272.068	C15H12O5	[M+H]+	Flavonoids	492-14-8	967550	667130	775140	1923300	2413700	2200100	6700500	7696500	10443000	453580	348740	409850	528540	504610	458800	565570	491710	461030	2490900	2471900	2418000	ko00941
pme1201	Phloretin	273.08	167	274.084	C15H14O5	[M-H]-	Flavonoids	60-82-2	9	9	9	9	9	9	71592	54089	88769	9	9	9	2983	9	9	4435.2	5402.3	4400	11739	10656	13582	ko00941,ko01110
mws0129	Genkwanin (Apigenin 7-methyl ether)	285.08	270	284.068	C16H12O5	[M+H]+	Flavonoids	437-64-9	64772	72333	50850	164440	163530	132650	2124800	1902800	2505600	41385	47936	36911	76724	89755	68642	107380	102880	104140	703530	720560	639790	--
mws0051	Acacetin	285.08	270	284.068	C16H12O5	[M+H]+	Flavonoids	480-44-4	70338	67237	47144	166250	137310	136380	2098700	2024800	2468700	40489	56283	38052	73021	80555	68662	103610	102050	104000	691800	696690	701750	ko00944
mws4160	Wogonin (5,7-Dihydroxy-8-Methoxyflavone)	285.08	270.07	284.068	C16H12O5	[M+H]+	Flavonoids	632-85-9	56278	56687	38177	132890	120760	101760	1568900	1462000	1981800	36729	46198	29314	73238	72832	55118	93966	101410	99420	551810	500070	523990	--
mws0918	Prunetin (5,4'-Dihydroxy-7-methoxyisoflavone)	283.06	268	284.068	C16H12O5	[M-H]-	Flavonoids	552-59-0	255180	242900	154220	596150	559510	462210	10819000	11531000	13148000	147480	224270	128440	321910	349970	299280	326630	291370	276410	3109800	2976300	3120400	ko00943
Hmyp008708	Izalpinin	285.08	242.06	284.068	C16H12O5	[M+H]+	Flavonoids	480-14-8	31236	28488	18108	61661	63594	49451	841290	802170	1038100	15875	19029	15487	36210	32395	28386	31246	26874	23057	266810	271220	270380	--
pme3250	Biochanin A	285.08	270	284.068	C16H12O5	[M+H]+	Flavonoids	491-80-5	53098	51562	37496	130890	120040	102770	1608300	1488100	2118000	37885	43872	30159	58980	67218	57403	93878	98553	93587	555290	525820	532980	ko00943,ko01100,ko01110
Lmmp004504	2'-Hydroxygenistein	287.06	153.02	286.047	C15H10O6	[M+H]+	Flavonoids	1156-78-1	926860	883360	1007700	882860	868330	944640	1103100	1117500	1324500	1089700	695880	816090	1142700	1316800	1069700	2184400	2236500	2002600	1145300	1079200	1217800	ko00943
Hmbp002730	Isoscutellarein	287.06	153.01	286.047	C15H10O6	[M+H]+	Flavonoids	41440-05-5	950010	878160	909860	888330	868520	899950	1082700	1095400	1230700	1081800	636690	805940	1084700	1263200	977830	1999600	2337600	2029700	1041100	1066600	999810	--
Cmxn006627	Maritimetin	285.04	185.06	286.048	C15H10O6	[M-H]-	Flavonoids	576-02-3	7881.8	6266.7	7357.2	10324	8224.1	6325.2	15414	17569	17275	3703.6	3674.6	4742.2	19977	25362	14792	21577	21967	19727	12602	12745	9079.3	--
mws1068	Kaempferol (3,5,7,4'-Tetrahydroxyflavone)	285.04	151	286.048	C15H10O6	[M-H]-	Flavonoids	520-18-3	84763	49771	99282	98868	83291	84733	193050	180720	225270	48733	38108	39712	108400	106080	89463	95195	99850	97613	85600	88660	94994	ko00941,ko00944,ko01100,ko01110
pmp000964	Aureusidin	287.06	153.01	286.048	C15H10O6	[M+H]+	Flavonoids	38216-54-5	930560	868490	926950	844850	859660	967280	1031700	1076800	1147400	1100100	648750	780070	1084100	1229900	1005200	1979100	2175900	1976500	1060300	995740	1005800	--
pme0088	Luteolin (5,7,3',4'-Tetrahydroxyflavone)	285.04	151	286.048	C15H10O6	[M-H]-	Flavonoids	491-70-3	3046100	2898900	3113200	2867700	2719700	2889600	3844900	3600000	4355000	4030900	2579700	3058800	3641900	4096200	3186600	7838800	8422100	7670400	3822900	3532900	3782600	ko00941,ko00944,ko01100,ko01110
Cmsp008121	7-O-Methylnaringenin	287.09	167.03	286.084	C16H14O5	[M+H]+	Flavonoids	-	10167	12074	8745.4	18346	20092	26384	45412	21232	32222	11414	8071.3	7140.8	29919	39773	31894	20655	24264	26424	20627	20751	18915	--
pme1662	5,4'-Dihydroxy-7-methoxyflavanone (Sakuranetin)	287.08	167	286.084	C16H14O5	[M+H]+	Flavonoids	2957-21-3	15875	11616	11476	33924	28972	32720	46056	27345	40382	11714	10868	7557.5	25188	44644	36374	24992	29274	29483	25571	22873	19638	ko00941,ko01110
Cmxp005429	Okanin	289.07	153.02	288.063	C15H12O6	[M+H]+	Flavonoids	484-76-4	3319100	2679300	3481400	7918400	9097800	8934500	9614300	12070000	12581000	1237500	1099000	1235400	2064400	1985100	1741600	1490900	1497400	1552800	5215400	5081200	5638400	--
mws1094	Aromadendrin (Dihydrokaempferol)	287.06	259	288.063	C15H12O6	[M-H]-	Flavonoids	480-20-6	7862.9	6025.2	7949.3	12332	13337	11985	93134	88226	160010	8516.4	6530.1	6883	18165	17652	12084	31613	29222	26507	31105	29052	31667	ko00941,ko01100,ko01110
Zmpn002440	3,4,2',4',6'-Pentahydroxychalcone	287.06	135.05	288.063	C15H12O6	[M-H]-	Flavonoids	14917-41-0	7956200	6338000	9144100	21099000	23670000	23682000	28158000	31834000	37481000	3141000	2565100	2860600	5055300	5317500	4610400	5303200	5065800	4877400	13658000	13333000	13763000	ko00941,ko01100
Cmxp004977	Isookanin	289.07	153.02	288.063	C15H12O6	[M+H]+	Flavonoids	-	9	9	9	9	9	9	30532	29187	49742	4468.9	9	3066.1	7125.1	6072.2	5943.4	9751.6	10138	6527.3	15176	14510	12845	--
mws0064	Eriodictyol (5,7,3',4'-Tetrahydroxyflavanone)	287.06	135	288.063	C15H12O6	[M-H]-	Flavonoids	552-58-9	6853400	5790000	8138900	18267000	20615000	20401000	25131000	27519000	32174000	2868200	2300100	2588100	4421000	4656600	4331100	4541400	4424800	4331200	12434000	11692000	12074000	ko00941,ko01100,ko01110
pmp001204	Apigenin-7,4'-dimethyl ether	299.09	284.1	298.084	C17H14O5	[M+H]+	Flavonoids	5128-44-9	2536.2	3142.6	1921.7	8158	6893.4	8546.5	948920	638280	776480	2515.4	4203.9	1954	6940.4	9848.5	6707.3	9923.5	9999.4	6576.4	159580	155990	156500	--
mws0058	Diosmetin (5,7,3'-Trihydroxy-4'-methoxyflavone)	299.06	284	300.063	C16H12O6	[M-H]-	Flavonoids	520-34-3	790050	563030	910640	1798300	2069400	1965700	1325900	1268800	1670900	295310	213140	257530	328630	383120	348710	418270	447300	402050	878630	945240	841020	--
pmf0567	Tectorigenin	299.06	211	300.063	C16H12O6	[M-H]-	Flavonoids	548-77-6	1079800	778220	1244900	2438200	2979200	2795400	1952900	1744400	2294900	430470	327120	405880	526970	589790	518900	648310	706840	629570	1267900	1214200	1294300	--
Zmhn003257	5,7,2'-Trhiyroxy-8-methoxyflavone	299.06	284.04	300.063	C16H12O6	[M-H]-	Flavonoids	-	760550	549850	892260	1773200	2132400	1808300	1351100	1226700	1684900	278720	199750	262640	332760	349880	335950	391880	454170	391230	865570	888040	835060	--
pmp001127	Chrysoeriol	301.07	286.08	300.063	C16H12O6	[M+H]+	Flavonoids	491-71-4	180640	130090	242430	387700	554500	538460	490220	374290	621340	67851	38574	40668	111650	160360	120770	112040	140510	114740	218420	198550	210130	ko00944
pmp000548	Pratensein	301.07	286.04	300.063	C16H12O6	[M+H]+	Flavonoids	2284-31-3	600890	445870	695140	1343800	1508000	1466100	1100300	946440	1253400	229270	148520	195010	281730	336870	291830	358570	386190	349850	701940	693860	686700	ko00943
pmp000001	Hispidulin (5,7,4'-Trihydroxy-6-methoxyflavone)	301.07	286.05	300.063	C16H12O6	[M+H]+	Flavonoids	1447-88-7	606360	432610	708690	1349100	1516200	1450800	1122700	954510	1290500	237760	153430	201880	278510	345530	303120	364260	381180	344850	723440	685400	712520	--
Lmjp004941	Rhamnocitrin (7-Methylkaempferol)	301.07	286.05	300.063	C16H12O6	[M+H]+	Flavonoids	569-92-6	578520	441130	734280	1337200	1556700	1460300	1108500	967160	1293400	233180	154090	198270	271130	338950	311640	363490	400350	354520	739970	675330	719480	--
Zmhp003514	6,7,8-Tetrahydroxy-5-methoxyflavone	301.07	286.05	300.063	C16H12O6	[M+H]+	Flavonoids	-	624630	460580	733830	1401800	1557200	1560500	1155900	992520	1325200	228270	162350	216880	303290	354040	313450	376790	412640	364690	752620	752050	741500	--
pmc1990	4'-Hydroxy-5,7-dimethoxyflavanone	299.1	223.1	300.1	C17H16O5	[M-H]-	Flavonoids	-	13118000	16637000	17147000	10548000	10657000	11677000	11416000	10393000	8768800	18203000	21455000	22913000	19384000	18460000	19830000	11078000	11521000	11365000	10680000	11080000	11554000	--
pme2246	Ellagic acid	301	185.02	302.006	C14H6O8	[M-H]-	Tannins	476-66-4	3938.1	4622.9	9	27299	27899	16782	49570	102900	72162	9	9	9	9	9	9	9	9	9	7605.7	21483	12992	--
pme2954	Quercetin	303.05	137.02	302.043	C15H10O7	[M+H]+	Flavonoids	117-39-5	36931	31943	40271	60624	48910	41022	81330	74129	96080	20407	19495	18196	52006	46799	56581	36880	42672	44134	57146	56818	53388	ko00941,ko00944,ko01100,ko01110
Zmpn004713	Isoetin (5,7,2',4',5'-Pentahydroxyflavone)	301.04	149.03	302.043	C15H10O7	[M-H]-	Flavonoids	1621-84-7	6512.7	4335.5	7242.8	34178	36894	34288	44642	23675	56175	4291.8	6711.4	4677.3	5135.9	4853.7	6492.7	6142.4	5633.9	5372.3	12129	15572	13238	--
Zmap007870	Blumeatin	303.09	167.03	302.079	C16H14O6	[M+H]+	Flavonoids	118024-26-3	567210	480270	563650	1149100	1157100	981630	20165	18080	21787	9	9	2013.3	11985	9	9	9	4376.4	9	249130	255270	254690	--
mws1033	Homoeriodictyol	303.09	153.02	302.079	C16H14O6	[M+H]+	Flavonoids	446-71-9	338610	335010	279050	1261500	1426800	1415200	2032800	2397200	2679800	114520	109440	108810	403670	381490	374900	482570	502380	504030	1036300	1000700	1004400	ko00941
mws0463	Hesperetin	301.07	164	302.079	C16H14O6	[M-H]-	Flavonoids	520-33-2	210230	195630	182280	969380	1255700	1059300	1709600	1905500	2146100	69565	59676	60284	217450	221290	206730	337630	333810	332850	691980	642620	668390	ko00941
Cmsp004086	Dihydrokaempferide	303.09	229.08	302.079	C16H14O6	[M+H]+	Flavonoids	137225-59-3	11935	27871	20905	19952	29169	15542	66896	37625	53235	15522	8626.6	11822	46332	64404	43921	100290	59191	49330	25789	24546	26538	--
Cmsp007228	7-O-Methyleriodictyol	303.09	167.03	302.079	C16H14O6	[M+H]+	Flavonoids	51857-11-5	566150	446880	544240	1167500	1173900	1014100	20743	19059	21619	9	9	9	13521	9	9	9	4826.6	4436.8	255050	257200	256790	--
mws0044	Dihydroquercetin(Taxifolin)	303.05	125.02	304.058	C15H12O7	[M-H]-	Flavonoids	480-18-2	71807	76908	109580	158910	150520	137740	745020	783990	878950	37819	34711	42501	50994	53541	41690	107880	122260	114690	169090	158580	148660	ko00941,ko01100,ko01110
Zmjp006969	Pectolinarigenin	315.09	282.05	314.078	C17H14O6	[M+H]+	Flavonoids	520-12-7	7883900	7120000	13439000	15976000	12967000	11158000	32845000	27253000	37793000	43097	110130	18794	316440	37885	39407	324010	113520	51187	10868000	10901000	11036000	--
HJAP057	Dihydroxy-dimethoxyflavone	315.09	282.06	314.078	C17H14O6	[M+H]+	Flavonoids	-	7590100	7050800	12980000	16255000	12561000	11034000	32826000	25647000	37741000	45475	111410	24395	322510	35292	38857	323850	118740	50705	10841000	10896000	11356000	--
Hmxp007521	3’,4’-Dihydroxy-7,5’-dimethoxyflavone*	315.09	300.06	314.079	C17H14O6	[M+H]+	Flavonoids	-	5463000	5190600	8600800	12434000	9723100	8360800	25559000	22773000	30340000	121920	173600	85570	614210	453630	427500	1007100	904630	889450	8509200	8931900	8933200	--
mws1174	3-O-Acetylpinobanksin	313.07	253	314.079	C17H14O6	[M-H]-	Flavonoids	52117-69-8	789330	925620	898010	1627800	1298400	2531300	1892600	600330	1072300	641940	575430	660130	2163500	2815300	2397000	1756100	1962600	1464100	1170700	1110500	1182900	ko00941
Lmsp008392	4',5-Dihydroxy-3',5'-dimethoxyflavone*	315.09	272.07	314.079	C17H14O6	[M+H]+	Flavonoids	-	23028	15741	30375	67822	95214	79855	196810	169280	249050	7132.1	6733.9	7350.8	28071	33738	26360	43756	43895	43598	69512	62919	66254	--
pmp000784	Cirsimaritin (4',5-dihydroxy-6,7-dimethoxyflavone)	315.09	254.06	314.079	C17H14O6	[M+H]+	Flavonoids	6601-62-3	190630	180610	314510	389930	318070	291710	953280	780940	1130100	2204	3785.3	1266.7	10071	3771.3	4038	14457	8670.6	8574.4	290440	288420	277190	--
mws0038	Kumatakenin	313.07	283	314.079	C17H14O6	[M-H]-	Flavonoids	3301-49-3	2244700	1567300	2489900	6997500	8796200	7397500	14187000	15148000	17765000	164510	198510	139330	528030	488820	479920	562730	542750	493560	5957500	5790000	6051100	--
Lmqn004838	3-O-Methylellagic acid	315.01	299.99	316.022	C15H8O8	[M-H]-	Tannins	-	5436500	3760300	5199400	6594000	5362200	4755400	6988500	7586500	10687000	103950	90651	42891	91688	52360	49305	127620	132160	105040	3635800	2991800	3516600	--
Lmdp003808	Azaleatin (5-O-Methylquercetin)	317.07	302.04	316.058	C16H12O7	[M+H]+	Flavonoids	529-51-1	23751	38347	31861	46018	51489	41535	93270	59055	91516	28014	25325	22667	288890	389440	363110	156590	129750	137370	121690	189400	117680	--
mws0066	Isorhamnetin	315.05	151	316.058	C16H12O7	[M-H]-	Flavonoids	480-19-3	58984	57674	73101	113810	104410	124930	208720	250440	247530	73898	54483	66401	233520	240960	193810	203010	181900	189200	157430	149690	162480	--
mws2627	Tamarixetin (3,3',5,7-Tetrahydroxy-4'-Methoxyflavone)	317.07	285.04	316.058	C16H12O7	[M+H]+	Flavonoids	603-61-2	10468	8750.3	11443	13971	14910	13299	19344	18891	26905	16417	10950	10029	42904	47417	34681	32767	29504	29275	21716	22198	23453	--
pmp000003	Nepetin (5,7,3',4'-Tetrahydroxy-6-methoxyflavone)	317.07	302.04	316.058	C16H12O7	[M+H]+	Flavonoids	520-11-6	2606600	1732900	3535100	6263000	7685400	7366600	10036000	9534000	12867000	588930	359910	389660	2212000	2614400	2340000	4000800	4085200	3906500	4797600	4663700	4644900	--
Lmmn004912	3-O-Methylquercetin	315.05	271.02	316.058	C16H12O7	[M-H]-	Flavonoids	1486-70-0	43304	36946	53116	19677	18597	24405	754930	690720	896820	14398	10493	10422	33633	34725	37965	83075	85361	90800	185330	179100	163900	ko00944
Lmfp001509	1-O-Galloyl-rhamnose	317.09	153.02	316.079	C13H16O9	[M+H]+	Tannins	-	6666.8	6369.2	7743.9	2915.7	4321.6	3261.6	6602.7	6965.4	7053.2	5285.5	3563.3	4329.2	2397.7	2923.5	2345.1	5012.8	6450.2	5711.4	3821	3678.9	3948	--
Lmsp009013	4',6-Dihydroxy-5,7-dimethoxyflavanone	317.1	197.05	316.095	C17H16O6	[M+H]+	Flavonoids	6951-57-1	6348.1	9562.7	10544	20360	12802	13702	63869	83126	65578	9	9	9	9	6100.1	9	9	9	9	14207	20377	17258	--
pmf0392	Persicogenin (5,3'-dihydroxy-7,4'-dimethoxyflavanone)	317.1	167.04	316.095	C17H16O6	[M+H]+	Flavonoids	28590-40-1	3764.9	4084.1	2956	42811	54434	42583	31745	26486	36252	12159	7426.1	6815.2	71048	72175	56343	46272	43390	38989	29360	29830	29698	--
Zmjp008503	Salvigenin	329.1	296.07	328.094	C18H16O6	[M+H]+	Flavonoids	19103-54-9	19981	29545	34701	92380	143540	102250	4165400	2566300	5295800	4258.9	9536.6	3279.4	5004.9	4829	3996.4	34214	6475.8	4433.1	756400	775700	804310	--
Lmsp011263	6-Hydroxy-5,7,4'-trimethoxyflavone	329.1	268.08	328.095	C18H16O6	[M+H]+	Flavonoids	6938-19-8	5420	7817.2	9322.4	23536	39186	28635	1147300	697220	1423500	1379.1	2579.6	1025.2	1600.5	1556.9	1614.1	9207	1918.6	2414.7	197760	203400	210010	--
pmp000107	Monohydroxy-trimethoxyflavone	329.1	314.1	328.095	C18H16O6	[M+H]+	Flavonoids	-	5665.5	6004.2	6630.8	15367	14396	9487.5	10089	12680	19063	9	9	9	9	9	9	9	9	9	5887.1	5558.5	6937.8	--
Lmsp008264	4'-Hydroxy-5,6,7-trimethoxyflavone	329.1	268.08	328.095	C18H16O6	[M+H]+	Flavonoids	6938-18-7	9	3186	2907.4	2500.4	2671.7	1565.7	10676	16351	13303	9	9	9	9	9	9	9	9	9	5382.7	5683.8	4998.9	--
Zmlp005013	3,3'-O-Dimethylellagic Acid	331.04	299.02	330.038	C16H10O8	[M+H]+	Tannins	2239-88-5	12465	10975	10182	21494	19276	23249	21991	21947	27049	4590.1	4463	1850.3	8528.4	11765	8261.2	12388	18817	17203	16590	14038	13291	--
Hmhp005160	Rehderianin I	331.07	316.05	330.074	C17H14O7	[M+H]+	Flavonoids	90965-30-3	1323100	1093100	1446800	2433800	2634800	2322200	2322500	2320100	2534800	334400	257610	316410	614850	680270	634620	696520	701080	681990	1445900	1444700	1477800	--
Lmzp004885	Tricin (5,7,4'-Trihydroxy-3',5'-dimethoxyflavone)	331.08	315.05	330.074	C17H14O7	[M+H]+	Flavonoids	520-32-1	1826300	596600	1350400	1703600	1426200	891130	1093700	1417900	1102900	212390	167490	248000	318240	281840	275500	847510	870810	921680	826550	815980	854090	--
Lmyp006951	5,8,4'-Trihydroxy-6,7-dimethoxyflavone*	331.08	273.04	330.074	C17H14O7	[M+H]+	Flavonoids	98755-25-0	737500	623290	832150	1482600	1482100	1418400	1460100	1397400	1606200	198340	150190	181040	345960	434930	379860	404650	417550	402220	825370	847600	797330	--
Lmjp005016	Cirsiliol (3',4',5-Trihydroxy-6,7-Dimethoxyflavone)	331.08	298.05	330.074	C17H14O7	[M+H]+	Flavonoids	34334-69-5	1799000	1441300	2517500	2857400	2787200	2310100	14689000	16076000	18226000	64261	123120	37603	105570	64504	62380	205880	92422	64231	3873500	4150300	4237800	--
pmp000004	4',5,7-Trihydroxy-3',6-dimethoxyflavone (Jaceosidin)*	331.08	316.06	330.074	C17H14O7	[M+H]+	Flavonoids	18085-97-7	1328400	1013400	1408700	2302800	2400400	2314900	2142100	2103600	2561400	342360	239070	285640	594680	638120	602300	662070	687620	627620	1364000	1355000	1280800	--
Lmsp011053	7-Hydroxy-2',5,8-Trimethoxyflavanone	331.12	197.06	330.11	C18H18O6	[M+H]+	Flavonoids	-	1273600	865590	1189100	3055300	2738000	2476000	4394300	6397800	5952500	3130.2	32819	9	33126	9	3649.4	49336	11089	9	1715700	1654600	1703200	--
Lmjp004404	Quercetagetin-3-Methyl Ether*	333.06	318.04	332.053	C16H12O8	[M+H]+	Flavonoids	64190-88-1	292280	213050	344470	496850	447830	359990	218660	233830	238340	91093	65519	87057	236210	231880	239660	136710	109440	115540	254890	277970	258630	--
Lmpn007255	Patuletin (Quercetagetin-6-methyl ether)	331.04	316.02	332.053	C16H12O8	[M-H]-	Flavonoids	519-96-0	364360	299260	519510	794720	867960	642090	397660	470920	500520	150010	108080	137150	329070	359550	305970	258520	177140	194130	422410	438900	448380	--
Lmjn004351	Quercetagetin-4'-Methyl Ether*	331.05	165.99	332.053	C16H12O8	[M-H]-	Flavonoids	-	109080	83490	146320	236000	248050	180370	128230	142160	147650	42556	29193	36307	93609	90585	86879	71756	54038	51163	128090	118960	117620	--
pmn001518	1-O-Galloyl-D-glucose*	331.07	169.01	332.074	C13H16O10	[M-H]-	Tannins	58511-73-2	184100	227430	253820	149460	166440	181110	24248	17689	27227	70038	85580	66837	89080	142500	115240	17174	12165	17526	82069	81045	84783	--
pmb2928	Gallic acid-4-O-glucoside*	331	313.1	332.074	C13H16O10	[M-H]-	Tannins	84274-52-2	192930	267350	361300	304720	308550	378220	32311	23051	37493	29697	29267	28578	105560	179280	149610	7471	5391.9	6509.9	91176	89947	89733	--
Xmgp006913	2,4,2',4'-tetrahydroxy-3'-prenylchalcone	341.14	137.06	340.131	C20H20O5	[M+H]+	Flavonoids	-	568210	637630	705990	1245300	1314200	1465000	2217200	1841800	2711900	299310	228830	256710	783940	1186000	784730	3049400	3116800	3122900	1092700	1087500	1084300	--
Lmcp007240	5,6,7,4'-Tetramethoxyflavone	343.12	313.08	342.11	C19H18O6	[M+H]+	Flavonoids	1168-42-9	15006	15882	16188	10895	12839	15327	61716	20930	14726	14693	13931	51463	13581	11411	13787	8908.8	9153	12273	29118	19752	18747	--
Lmjn005592	Cirsilineol (4',5-Dihydroxy-3',6,7-trimethoxyflavone)	343.08	313.04	344.09	C18H16O7	[M-H]-	Flavonoids	41365-32-6	6354900	4864800	6252400	10961000	12757000	11174000	12582000	11712000	14152000	1833400	1471700	1590800	4230100	4724900	4565900	4873100	4869600	4820200	7683400	7796400	7635300	--
mws1474	5,7-Dihydroxy-3',4',5'-trimethoxyflavone	345.1	284	344.09	C18H16O7	[M+H]+	Flavonoids	18103-42-9	7346600	6468000	9566700	20856000	17363000	15606000	25568000	27685000	26562000	1025700	962580	890740	2511100	2323900	2237700	2621000	2675700	2432500	11714000	12226000	11956000	--
pmp000786	Eupatorin (5,3'-Dihydroxy-6,7,4'-trimethoxyflavone)*	345.1	330.07	344.09	C18H16O7	[M+H]+	Flavonoids	855-96-9	2167600	1725800	2264500	3702200	4087900	3672900	4281700	3653900	4164000	702900	505400	602470	1546800	1673800	1444800	1612300	1727500	1694600	2578000	2565600	2481300	--
pmp000006	Eupatilin (5,7-Dihydroxy-3',4',6-Trimethoxyflavone)*	345.1	330.07	344.09	C18H16O7	[M+H]+	Flavonoids	22368-21-4	2040400	1636700	2169500	3542500	3979700	3555900	4047000	3183500	3930900	691720	482450	550310	1380600	1524500	1489400	1563800	1513100	1541000	2567400	2443400	2363300	--
HJAP058	5,6,7,4'-Tetramethoxyflavanone	345.1	284.07	344.125	C19H20O6	[M+H]+	Flavonoids	2569-77-9	1406400	1256100	1914300	4415200	3814800	3359000	5987100	6108500	6036100	209470	193100	164670	501430	458300	429110	492280	499410	437890	2477900	2422000	2409700	--
Zmhp002734	5,7,2',5'-Tetrahydroxy-8,6'-dimethoxyflavone*	347.08	332.06	346.068	C17H14O8	[M+H]+	Flavonoids	-	950770	918270	1155100	4370000	4320900	5400900	1418200	1169700	2026500	118470	33786	31547	131210	145030	124210	208110	297460	220030	1123100	1145100	1228500	--
Hmcp003223	Limocitrin (5,7,4'-trihydroxy-8,3'-dimethoxyflavone)	347.07	332.05	346.069	C17H14O8	[M+H]+	Flavonoids	489-33-8	644510	587690	760530	2424000	2359600	1957900	840460	1120500	1153600	424220	337080	407610	1280200	1335900	1252900	1268500	1094600	1147800	1091000	1133500	1193500	--
mws1002	Syringetin	345.06	330	346.069	C17H14O8	[M-H]-	Flavonoids	4423-37-4	3151000	1884600	3755800	5659700	7575800	7672400	5339000	5206600	6055100	2908100	1526800	1989700	6828100	6761800	6945200	13849000	12800000	14526000	6053700	5326800	5333900	ko00944
Lmjp005033	Quercetagetin-3,4'-Dimethyl Ether	347.08	314.04	346.069	C17H14O8	[M+H]+	Flavonoids	-	9233.4	5304.7	11056	27570	15229	12735	26304	43359	43438	9	9	9	9	9	9	9	9	9	14819	17956	14962	--
Hmgp003163	3,3',5,7-Tetrahydroxy-4',6-Dimethoxyflavone; (Laciniatin)*	347.08	332.05	346.07	C17H14O8	[M+H]+	Flavonoids	74161-28-7	637340	573890	768710	2236100	2224700	1823300	840170	1146800	1145000	455960	363730	407650	1213400	1324300	1265500	1264800	1105600	1128800	1077400	1107900	1202300	--
Lmgn002933	5,7-Dihydroxy-2',3',4'-trimethoxydihydroisoflavone	345.1	315.05	346.106	C18H18O7	[M-H]-	Flavonoids	-	2666300	1628000	3187200	5541300	7069100	7311000	4513500	4681000	5257100	2502200	1276700	1717000	5703900	6061500	5716600	11598000	11218000	12160000	5020700	4945400	5128900	--
pmp000008	5-Hydroxy-6,7,3',4'-tetramethoxyflavone	359.11	344.08	358.105	C19H18O7	[M+H]+	Flavonoids	21763-80-4	155150	210040	180460	579670	508420	417660	11664000	8318300	15860000	14799	27781	10833	44050	41357	34524	179420	60793	54850	2314000	2467100	2547500	--
Lmsp010393	Eupatorin-5-methylether (3'-hydroxy-5,6,7,4'-tetramethoxyflavone)	359.11	298.09	358.105	C19H18O7	[M+H]+	Flavonoids	21764-09-0	69692	94223	80967	259500	225250	183000	5573700	3802000	7456400	5831.4	11526	4374.5	16685	16885	14120	73126	23251	20270	1044600	1117600	1106000	--
Lmjp007279	Penduletin 4'-Methyl Ether (5-Hydroxy-3,6,7,4'-Tetramethoxyflavone)	359.11	326.08	358.105	C19H18O7	[M+H]+	Flavonoids	14787-34-9	9	9	9	3416.9	4431.4	4203.3	21383	13977	26015	9	9	9	9	9	9	9	9	9	4976	5963.2	6832.4	--
pmp000009	Centaureidin (5,7,3'-Trihydroxy-3,6,4'-Trimethoxyflavone)	361.09	303.05	360.084	C18H16O8	[M+H]+	Flavonoids	17313-52-9	50421	36245	57922	101230	91346	71739	94264	85360	106800	9394.1	8228.9	7185.2	33313	35145	32604	52829	53368	51323	51022	51043	53228	--
pmp000788	Chrysosplenol D*	361.09	346.06	360.084	C18H16O8	[M+H]+	Flavonoids	14965-20-9	2662600	2055300	3337400	5890300	5195000	4204900	5576500	5675900	6844100	399800	282020	294620	1663500	1736000	1753200	2309500	2280700	2447000	3038400	3204300	3088400	--
pmp001169	Irigenin	361.09	310	360.084	C18H16O8	[M+H]+	Flavonoids	548-76-5	13914	9414.4	13418	25000	23380	19158	27665	25631	33543	1788.5	2167.9	773	8491.7	10217	8352	11945	11203	10438	14863	16116	14295	--
Lmjp005224	4',5,7-Trihydroxy-3',3,6-Trimethoxyflavone (Jaceidin)*	361.09	328.06	360.085	C18H16O8	[M+H]+	Flavonoids	10173-01-0	5713400	4252200	5372300	4236600	4650900	4667800	5466300	4626100	5799300	5786100	3743700	5111500	9016100	9959500	9534700	11172000	11060000	10957000	4598900	4851700	5570800	--
Lmxn007955	Sudachitin*	359.08	329.03	360.085	C18H16O8	[M-H]-	Flavonoids	4281-28-1	2322500	1890000	2602000	4461400	4319300	3605100	8948500	9196000	10777000	837100	641760	747600	2000900	2042500	2011700	2791600	2798800	2836200	3953800	3861400	3814800	--
Lmxn007456	Acerosin*	359.08	329.03	360.085	C18H16O8	[M-H]-	Flavonoids	15835-74-2	449360	335520	512230	979940	856690	634570	860170	1142100	1255900	58454	42305	47915	253480	226850	248640	334340	356720	407780	515900	518760	505650	--
Zmjp008548	Chrysosplenol F*	361.09	346.07	360.085	C18H16O8	[M+H]+	Flavonoids	-	481480	450960	565400	1769000	1827100	1368700	632490	801360	639220	179080	146110	151340	461770	390910	429790	498460	569000	578680	678230	684420	741210	--
Lmjp004839	Arcapillin (2',4',5-trihydroxy-5',6,7-trimethoxyflavone)	361.09	300.06	360.085	C18H16O8	[M+H]+	Flavonoids	83162-82-7	578670	437470	642450	1070400	1025300	792830	1125000	1078800	1345700	91635	63368	71415	376030	382150	385190	543210	521020	555310	551990	660970	627200	--
pmp001076	Isosinensetin	373.13	343.08	372.121	C20H20O7	[M+H]+	Flavonoids	17290-70-9	16781	19642	17506	13672	12634	12643	44878	17378	13260	16689	12544	63485	13376	9364	9369.6	9513.9	8981	8412.3	29438	19390	19863	--
Zmhp004269	Skullcapflavone II	375.11	360.08	374.1	C19H18O8	[M+H]+	Flavonoids	55084-08-7	17443000	15275000	18665000	20309000	19435000	16792000	46169000	45690000	49037000	14801000	10863000	11930000	24453000	28077000	25945000	28916000	30583000	30111000	24424000	25978000	26382000	--
Hmmp007513	5,7-Dihydroxy-6,3',4',5'-tetramethoxyflavone (Arteanoflavone)	375.11	345.06	374.1	C19H18O8	[M+H]+	Flavonoids	68710-17-8	13222000	12031000	14793000	13016000	12279000	11273000	38747000	37840000	39249000	11712000	8999400	10481000	19679000	22913000	20815000	23412000	24074000	24861000	18661000	20647000	20448000	--
Lmjp005690	Chrysosplenetin (Quercetagetin-3,6,7,3'-tetramethyl ether)	375.11	314.08	374.1	C19H18O8	[M+H]+	Flavonoids	603-56-5	19433	18869	31706	96846	72467	50694	99822	114300	121410	9	9	9	9	9	9	9	9	9	29383	32220	28678	--
pmp000789	Casticin (5,3'-Dihydroxy-3,6,7,4'-Tetramethoxyflavone)	375.11	299.05	374.1	C19H18O8	[M+H]+	Flavonoids	479-91-4	1078500	1050600	1352500	1482000	1300400	1069100	5221700	5638800	5677200	350220	294810	285550	676500	759950	706280	816270	890010	862630	1828500	1884500	1905000	--
Lmjp006769	Artemetin (5-Hydroxy-3,3',4',6,7-pentamethoxyflavone)	389.12	331.08	388.116	C20H20O8	[M+H]+	Flavonoids	479-90-3	302490	451440	296320	249900	253170	196610	11203000	8697900	15516000	5495	25098	3547	7450.8	5404.4	3816.7	107880	13237	6118	2387100	2535200	2550600	--
pmp000113	5-Hydroxy-6,7,8,3',4'-pentamethoxyflavone	389.12	359.08	388.116	C20H20O8	[M+H]+	Flavonoids	2174-59-6	494590	697490	479020	400090	417580	310060	17158000	13851000	22918000	9239.3	39656	4978.1	13113	7446.4	7439.5	168430	22155	9560.8	3767900	4009700	4089200	--
pmb0681	Apigenin-8-C-Arabinoside	403.1	367.08	402.095	C20H18O9	[M+H]+	Flavonoids	-	28746	10132	36707	242620	440020	241190	133050	216030	151000	9	9	9	3739.5	9	4196.1	9138.5	8660.4	9	74906	80061	76910	--
mws0043	Nobiletin (5,6,7,8,3',4'-Hexamethoxyflavone)	403.14	373.1	402.131	C21H22O8	[M+H]+	Flavonoids	478-01-3	382270	425480	334540	296240	337880	380970	985800	507170	319150	381690	374420	902230	412930	336510	381850	243300	246400	303820	470780	426700	411630	--
pmb0580	Chrysin-5-O-glucoside (Toringin)*	417.1	255.1	416.111	C21H20O9	[M+H]+	Flavonoids	1329-10-8	19730	17316	17463	41972	49914	41464	28250	20177	18765	11470	7633	13232	34868	47911	47737	79753	76897	63633	28806	29575	29745	--
Lmyp005841	Chrysin-7-O-glucoside*	417.12	255.06	416.111	C21H20O9	[M+H]+	Flavonoids	31025-53-3	19210	20458	19931	41199	55579	44122	23332	17744	26205	18062	14947	17909	34149	56579	47424	75191	83300	71239	31295	36961	31437	--
Lmbp003668	Kaempferol-3-O-arabinoside	419.1	287.05	418.09	C20H18O10	[M+H]+	Flavonoids	-	41763	62065	48368	70958	64174	53044	61392	65529	86469	34827	25852	27945	434110	675670	462660	334970	390650	339470	158780	172960	160560	--
pma6218	O-MethylNaringenin-8-C-arabinoside	419.1	383.1	418.126	C21H22O9	[M+H]+	Flavonoids	-	16644	7462.7	11257	12626	9287.1	19964	28027	47937	42712	9	9	6532.4	9	9	9	19264	24123	9	20327	16369	17626	--
mws1434	Apigenin-6-C-glucoside (Isovitexin)*	431.1	311	432.106	C21H20O10	[M-H]-	Flavonoids	29702-25-8	2757900	3313900	3520300	4672100	4718600	5156000	7786300	9721900	6738600	223970	266680	208170	732420	626840	585430	1019300	872830	797660	3364800	3380200	3679300	ko00944
mws0048	Apigenin-8-C-Glucoside (Vitexin)*	431.1	311	432.106	C21H20O10	[M-H]-	Flavonoids	3681-93-4	2646000	3260600	3370200	4222900	5031900	4470200	7049300	8583600	6998600	205700	264600	201800	669320	661000	605220	941990	782490	789300	3665800	3325100	3586600	ko00941,ko00944
Lmdp003509	Quercetin-3-O-xyloside (Reynoutrin)	435.09	303.06	434.085	C20H18O11	[M+H]+	Flavonoids	549-32-6	87897	104180	90698	253870	254470	204370	896130	390210	1026000	88779	78412	79937	1008800	1530700	1285000	1343400	1625400	1313800	513750	514070	526020	--
mws2186	Avicularin(Quercetin-3-O-α-L-arabinofuranoside)	435.09	303	434.085	C20H18O11	[M+H]+	Flavonoids	572-30-5	65719	88763	70598	203550	193520	153470	756430	367670	762150	82772	76444	53121	909460	1315200	1003100	1201800	1256500	1193700	440160	461130	451430	--
mws1179	Naringenin-7-O-glucoside (Prunin)*	433.11	271	434.121	C21H22O10	[M-H]-	Flavonoids	529-55-5	44208	42341	42757	67169	96778	85664	247960	149400	295990	15060	17675	18278	28141	35785	42270	83493	88774	75503	74566	77418	74114	ko00941
HJN090	Butin-7-O-glucoside	433.11	271.06	434.121	C21H22O10	[M-H]-	Flavonoids	-	22894	15440	12512	33487	75486	40450	253860	249340	392590	3615.8	4256.8	4080.9	7511.4	6991.1	9	13770	8028.9	9	60560	59114	61150	--
HJN087	Naringenin-4'-O-glucoside*	433.12	271.06	434.121	C21H22O10	[M-H]-	Flavonoids	-	26145	11874	16996	37138	72570	46230	277590	266550	434430	5588.7	4102.6	4817.4	6882.2	9011.1	7469.9	8437.9	7388.1	6551.7	70526	57176	64397	--
HJN055	Dihydrocharcone-4'-O-glucoside	435.13	273.08	436.136	C21H24O10	[M-H]-	Flavonoids	-	9	9	9	41488	36410	30618	26916	27577	31056	16452	6579.8	6687	28677	29815	31837	18190	16825	17418	18882	24363	17942	--
mws2118	Phloretin-2'-O-glucoside (Phlorizin)	435.13	166.7	436.137	C21H24O10	[M-H]-	Flavonoids	60-81-1	3898	4663.7	3338	2699.6	4509.5	5261.7	6863.4	4156.2	4657.2	15008	2609.3	5077.7	1864.9	3267.6	2783.9	4539.9	2918.1	4915.6	7029.2	3557.4	8090.4	ko00941,ko01110
mws0355	Catechin gallate*	441.08	169.02	442.09	C22H18O10	[M-H]-	Flavonoids	130405-40-2	44065	38361	41697	43657	40452	41228	22296	19428	16864	100210	67570	65512	65588	72251	74948	40957	34663	39140	42204	48689	43891	--
mws1397	Epicatechin gallate*	441.08	169	442.09	C22H18O10	[M-H]-	Flavonoids	1257-08-5	41455	29366	40130	50353	33873	42810	34900	19643	21469	95180	69399	71521	78276	79307	79004	35845	45783	38954	43811	42272	54264	--
mws0052	Baicalin	447.09	271.07	446.085	C21H18O11	[M+H]+	Flavonoids	21967-41-9	659770	768880	1186300	2608400	2384800	2139600	1942800	2403100	3580800	3248800	2482200	2792400	9283700	9966600	8344500	6298800	7913900	6861000	3382200	4145500	4030000	--
pmn001697	Apigenin-7-O-glucuronide	445.08	269.05	446.085	C21H18O11	[M-H]-	Flavonoids	29741-09-1	210220	187030	302660	742230	683820	564670	604820	666850	940190	777180	853540	814440	1633700	1563400	1271500	2679600	3250000	2543600	1054600	1086300	1069300	--
pmp000575	Acacetin-7-O-glucoside (Tilianin)*	447.13	285.18	446.121	C22H22O10	[M+H]+	Flavonoids	4291-60-5	5593.8	6074.6	3477.3	9	9	3647	102030	70268	107650	10845	13865	10219	82882	101580	98332	89528	116240	103310	52134	43663	44327	--
pmp000573	Acacetin-7-O-galactoside*	447.13	285.08	446.121	C22H22O10	[M+H]+	Flavonoids	-	9	4692.4	3828.2	5737.9	4579.8	3971.9	129980	87999	136800	19146	17282	16179	110440	138830	112620	142440	153470	128010	59103	68493	62560	--
mws2209	Kaempferol-3-O-glucoside (Astragalin)*	449.11	287.06	448.101	C21H20O11	[M+H]+	Flavonoids	480-10-4	731880	835720	726480	426920	418080	463410	945090	917350	1342300	1899500	932800	989550	17919000	24940000	18841000	12053000	12300000	10601000	4708000	5146700	4578500	ko00944,ko01110
mws0913	Kaempferol-3-O-galactoside (Trifolin)*	447.09	285	448.101	C21H20O11	[M-H]-	Flavonoids	23627-87-4	10357000	13539000	10802000	5002500	4157300	5758500	1371300	785430	1314700	2737300	3265900	2434700	1731900	1858700	1640800	3631400	5120300	3730800	4151200	4465900	3999100	ko00944
pme2459	Luteolin-7-O-glucoside (Cynaroside)	449.11	287.2	448.101	C21H20O11	[M+H]+	Flavonoids	5373-11-5	25997000	26827000	26293000	11051000	12109000	15609000	2735500	1870700	3970100	9558500	8219200	6389300	8645300	11691000	9141900	10728000	11771000	11704000	11058000	9911900	11413000	ko00944
HJN086	Eriodictyol-3'-O-glucoside*	449.11	287.06	450.116	C21H22O11	[M-H]-	Flavonoids	-	23028	23737	24554	97235	136640	95129	98766	74974	115080	12756	14150	14441	12003	11171	8786.2	14283	14403	18830	38744	39415	40558	--
Lmmn004625	Dihydrokaempferol-7-O-glucoside*	449.11	287.06	450.116	C21H22O11	[M-H]-	Flavonoids	-	68110	61285	56040	142330	207120	166110	257760	139310	275800	32804	23148	22410	42548	61904	45768	64535	62751	57586	86942	93591	89543	--
Lmlp005236	Dihydrokaempferol-3-O-glucoside*	451.12	289.08	450.116	C21H22O11	[M+H]+	Flavonoids	1049-08-8	1038600	1125600	1173200	855720	905960	955190	394350	408790	477750	297340	250240	221880	226870	385560	324380	351980	387830	327590	477730	532360	588710	--
pmb3023	Eriodictyol-8-C-glucoside*	449.11	287	450.116	C21H22O11	[M-H]-	Flavonoids	1023271-51-3	14001	11408	12782	23832	44659	34487	91243	57825	119790	6286.7	6483.7	4782.6	22363	30228	26809	15392	18657	12471	28742	26445	28374	--
Zmhn001257	Catechin-5-O-glucoside	451.12	289.07	452.132	C21H24O11	[M-H]-	Flavonoids	-	9	9	9	18950	22962	23481	9525.1	7348.7	13419	9	9	9	13908	22288	11599	9	9	3790.6	5763	5512.9	6511.2	--
Hmhp004295	Wogonin-7-O-Glucuronide (Wogonoside)	461.1	285.08	460.101	C22H20O11	[M+H]+	Flavonoids	51059-44-0	9	9	9	4274	5180.7	4772.9	34553	51927	50362	9	2413.2	1758.6	9	9	9	9	9	9	10926	10061	10709	--
pmp000577	Acacetin-7-O-glucuronide	461.12	285.08	460.116	C26H20O8	[M+H]+	Flavonoids	-	9	1850.1	9	3262.9	5491.7	4387.6	39712	60060	56300	9	2463.5	3647.3	2774.3	9	2630.1	1633.4	2291.9	9	12650	11923	12398	--
pmp000012	Scutellarein-7-O-glucuronide (Scutellarin)	463.09	287.05	462.08	C21H18O12	[M+H]+	Flavonoids	27740-01-8	7534400	7795700	7819500	9252600	9219200	9127700	5270500	4869300	6667300	11872000	11120000	10734000	22462000	23998000	22621000	16270000	19446000	19481000	11631000	12964000	11756000	--
Lmzn001894	Kaempferol-3-O-glucuronide	461.07	285.04	462.08	C21H18O12	[M-H]-	Flavonoids	22688-78-4	8422600	9798300	9778300	11420000	13000000	14043000	8496700	7599800	11951000	11766000	10638000	9884000	18849000	22155000	18706000	16314000	19574000	16792000	12338000	13971000	13367000	--
mws4167	Luteolin-7-O-glucuronide	463.09	287.06	462.08	C21H18O12	[M+H]+	Flavonoids	29741-10-4	7207800	8156200	9018600	8531400	8947200	9047700	4804100	4408000	6907600	11295000	9733900	11548000	21722000	27519000	21826000	17976000	23037000	18874000	11184000	12242000	11413000	ko00944
pmn001702	Tetahydroxyflavone-7-O-glucuronide	461.07	285.05	462.08	C21H18O12	[M-H]-	Flavonoids	-	8112400	8671000	11079000	10691000	10500000	11938000	7586000	9110600	12116000	11194000	9293800	10367000	18191000	22322000	17472000	18092000	20677000	17470000	13338000	13880000	12058000	--
Lmmp002795	Pratensein-7-O-glucoside	463.12	301.07	462.115	C22H22O11	[M+H]+	Flavonoids	36191-03-4	30680	10527	28123	21234	23536	29430	67393	41299	91161	397530	199330	312900	266810	365730	314070	215950	227890	204090	120800	131000	129190	--
pmp000579	Diosmetin-7-O-galactoside	463.12	301.07	462.116	C22H22O11	[M+H]+	Flavonoids	-	21884000	13789000	15985000	14741000	24333000	15994000	13870000	17414000	12634000	2556300	1902400	1664800	14333000	24176000	18457000	22337000	26045000	23987000	14109000	14580000	14330000	--
HJAP011	Chrysoeriol-8-C-glucoside (Scoparin)	463.11	343.08	462.116	C22H22O11	[M+H]+	Flavonoids	301-16-6	47067	46897	45299	132740	190210	152390	178380	213570	237010	182120	146910	183540	898260	1018100	872830	972660	1050000	898350	295040	330840	329860	--
Lmjp003655	6-C-MethylKaempferol-3-glucoside	463.12	301.08	462.116	C22H22O11	[M+H]+	Flavonoids	-	21851000	12780000	15585000	13777000	23528000	14925000	12720000	15259000	11174000	2297400	1670200	1795100	13929000	21445000	18468000	23852000	27518000	22519000	13959000	14003000	13515000	--
pmp001163	Tectoridin	463.12	286	462.116	C22H22O11	[M+H]+	Flavonoids	611-40-5	1309000	963360	989870	1445200	2033900	1467200	975610	1090600	1019900	296950	197590	178040	2816700	4544900	3411300	4058200	5209100	4733300	1753700	1824300	1911900	--
Hmgp002189	Hispidulin-7-O-Glucoside	463.13	301.07	462.118	C22H22O11	[M+H]+	Flavonoids	17680-84-1	21582000	13832000	14678000	15027000	24095000	16142000	12798000	15973000	13403000	2395500	1705200	1761900	13107000	22318000	18373000	22183000	27816000	22272000	14248000	15217000	14764000	--
Hmdn001667	Ellagic acid-4-O-glucoside	463.05	300.99	464.06	C20H16O13	[M-H]-	Tannins	-	709000	405360	455860	170230	182200	154790	134200	128140	137440	102220	84628	79478	208170	239240	259400	331700	444240	347860	237560	280110	231520	--
mws0091	Quercetin-3-O-glucoside (Isoquercitrin)*	463.09	300.03	464.095	C21H20O12	[M-H]-	Flavonoids	482-35-9	2661100	2788700	2504000	2409600	2451100	2168400	9233200	3961900	8024300	1916400	1474100	1264200	3669500	3518300	4134100	7805700	8314300	7822200	3584600	4247700	3947000	ko00944,ko01100,ko01110
mws0856	Quercetin-4'-O-glucoside (Spiraeoside)*	463.09	301	464.095	C21H20O12	[M-H]-	Flavonoids	20229-56-5	2738500	3347000	2651200	2944500	3373400	2599700	8672400	4671400	8964700	1707800	1608500	1389300	3312300	3486100	3941600	7780000	7825900	6561900	4199000	4023900	4120800	--
mws1329	Quercetin-7-O-glucoside*	463.09	300.7	464.095	C21H20O12	[M-H]-	Flavonoids	491-50-9	2650600	2662400	2685800	2276700	3094400	2531800	7963700	3690100	7069000	1545100	1368800	1178700	3262600	3298000	3206600	6604500	7124700	7604200	3422500	3579300	3667300	--
mws0061	Quercetin-3-O-galactoside (Hyperin)*	463.09	300	464.095	C21H20O12	[M-H]-	Flavonoids	482-36-0	492190	295030	304220	136460	109740	129420	88585	91309	95991	72677	43416	66457	112310	172660	150090	239120	252080	243870	187220	156700	148990	--
pmp001309	6-Hydroxykaempferol-7-O-glucoside	465.1	303.1	464.095	C21H20O12	[M+H]+	Flavonoids	-	2610200	1484000	1892300	726850	803240	782910	536690	434080	619230	345310	250280	252720	909660	1781100	1320400	1227600	1457200	1312200	919950	1041900	947350	--
pmb3019	Chrysoeriol-7-O-homovanillic acid	463.1	299.2	464.111	C25H20O9	[M-H]-	Flavonoids	-	11019	8214.9	8388.7	10450	8936.6	9210.7	11700	15766	10086	6028.4	8678.4	6565.4	7511.7	5869	5719.1	4879.2	7304.4	7805.4	14790	16797	13906	--
Lmzp002365	Hesperetin-7-O-glucoside*	465.14	303.09	464.131	C22H24O11	[M+H]+	Flavonoids	31712-49-9	882060	579670	695180	1536400	2130900	1736800	1823100	1235300	2029000	157500	166800	157870	706790	996790	830390	864560	1078300	806770	1034300	1109900	1079200	ko00941
pme1598	Hesperetin-5-O-glucoside*	463.12	301	464.132	C22H24O11	[M-H]-	Flavonoids	69651-80-5	2990700	2820500	2577100	2567000	2620500	2409700	8673300	3382300	8114800	1592000	1459600	1204800	3441700	3914600	3916600	7042800	7440100	7225900	3705400	3790100	3966400	--
Xmsn002700	Taxifolin-3'-O-glucoside	465.13	303.06	466.111	C21H22O12	[M-H]-	Flavonoids	31106-05-5	75367	61272	61870	66036	81307	78728	189350	89205	213980	36630	36862	22698	84639	120450	93090	170070	172150	181920	86552	86355	85083	--
Hmmp002121	Isorhamnetin-3-O-gallate	469.12	317.08	468.113	C23H16O11	[M+H]+	Flavonoids	-	12689	18041	16499	18139	15482	11361	10615	9407.9	13315	3246.8	4786.2	9	9356.1	10856	8334.6	9	3385.4	9	12643	12132	11073	--
pmp000581	Apigenin-7-O-(6''-acetyl)glucoside	475.12	271.06	474.116	C23H22O11	[M+H]+	Flavonoids	72741-92-5	13493	12233	13462	19003	15850	21138	5449.3	2863.6	4832.2	15651	12563	12349	23299	41489	30880	60331	69715	58147	18428	17011	16739	--
pmp000583	Diosmetin-7-O-glucuronide	477.1	301.07	476.095	C22H20O12	[M+H]+	Flavonoids	35110-20-4	3116300	2983200	4434200	4617000	6314800	4925500	6741000	7442000	8005500	2022900	1759700	1761500	8679200	9910700	7735300	5736800	6709600	5766900	4835900	5412100	4776800	--
HJAP056	Dihydroxy-dimethoxyflavone-7-O-glucoside*	477.14	315.1	476.131	C23H24O11	[M+H]+	Flavonoids	-	37384	29646	36018	91392	79103	64939	449220	398820	593790	9399.7	9997.9	8586.7	106690	137290	98852	150610	172240	153970	148540	138900	141640	--
pmp000172	5,2'-Dihydroxy-7,8-dimethoxyflavone glycosides*	477.14	315.08	476.132	C23H24O11	[M+H]+	Flavonoids	-	19242	12598	13848	38717	28745	22988	219830	212930	294260	9051.9	4934.1	8100	54513	55000	51107	103170	117690	88599	82752	69634	78589	--
Lmfn003760	Quercetin-4′-O-glucuronide*	477.07	301.04	478.075	C21H18O13	[M-H]-	Flavonoids	201463-36-7	677790	662010	816190	779930	869410	623130	655190	1508400	1459700	237950	164110	227850	555940	544710	427590	349340	351790	284350	605190	667480	595150	--
Lmqp003647	Herbacetin-3-O-glucuronide	479.08	303.05	478.075	C21H18O13	[M+H]+	Flavonoids	-	391260	412130	405840	340110	372750	264700	330880	656350	502890	149390	117480	149730	405900	284880	208490	144730	143420	157960	332200	358130	329990	--
Lmmp003783	Quercetin-3-O-glucuronide*	479.09	303.05	478.075	C21H18O13	[M+H]+	Flavonoids	22688-79-5	216210	162940	166560	695410	1116600	800050	2051700	2576500	3647100	13885	9693.2	13065	18164	17399	14954	16455	14615	19276	704160	688680	684970	--
Lmjp003044	Isorhamnetin-3-O-Glucoside*	479.12	317.06	478.111	C22H22O12	[M+H]+	Flavonoids	5041-82-7	2761800	3654300	2900900	6319500	6047500	6603300	6734800	4284500	8072200	1389900	1110000	1124900	8309200	11792000	8337800	4953800	5509300	4618400	4499300	4520400	4599000	--
Lmjp002906	Rhamnetin-3-O-Glucoside*	479.12	317.07	478.111	C22H22O12	[M+H]+	Flavonoids	27875-34-9	3044100	2199900	2352900	3041600	3402800	3888400	4339000	3361000	4121700	607950	463680	502600	2252200	3305100	2861700	3712000	4266100	3978200	2453700	2605600	2433800	--
Hmcp002207	Isorhamnetin-7-O-glucoside (Brassicin)*	479.12	317.06	478.111	C22H22O12	[M+H]+	Flavonoids	6743-96-0	2516700	3408800	2858200	6241900	5925900	6070800	7716200	4197200	8380000	1468400	1075000	1134800	8174600	11592000	8799300	5132800	5460400	4760200	4879600	4657500	4768000	--
Hmgp002148	Nepetin-7-O-alloside*	479.12	317.06	478.112	C22H22O12	[M+H]+	Flavonoids	-	2685500	3539600	2815200	5923200	6373900	5953600	7190800	4362300	8455500	1419500	1050800	1187700	8629200	11453000	8796100	5030800	5681800	4887900	4678400	4707300	4790000	--
Hmgp002036	Nepetin-7-O-glucoside*	479.12	317.06	478.112	C22H22O12	[M+H]+	Flavonoids	569-90-4	2832300	2180400	2410500	2705800	3123800	3729700	4090500	2775100	3924700	643110	578210	514540	2031300	3529800	2822600	4058000	3442900	3354700	2347500	2513900	2349800	--
mws1454	Persicoside	477.14	315	478.148	C23H26O11	[M-H]-	Flavonoids	28978-03-2	570640	560960	637070	611260	734130	686230	220570	263760	325640	265060	159520	173110	441380	588010	457890	126990	141210	110370	356570	327060	368940	--
HJN104	Dihydromyricetin-3-O-glucoside	481.14	319.08	482.105	C21H22O13	[M-H]-	Flavonoids	-	158800	135510	197280	38502	39337	29882	9	9	9	243500	138230	176730	75318	82040	75991	9	9	9	70496	77377	79631	--
Lmmn003398	Kaempferol-3-O-(6''-acetyl)glucoside	489.11	285.04	490.111	C23H22O12	[M-H]-	Flavonoids	-	20354	19480	25093	37095	33081	30861	21843	39526	46105	491910	305120	283580	1003700	1042400	1483800	459950	642670	489960	309250	327940	347930	--
Zmhp002964	5,7-Dihydroxy-6,8-dimethoxyflavone-7-O-glucoside	491.12	315.1	490.111	C23H22O12	[M+H]+	Flavonoids	-	9	9	9	6902.7	5500.8	4335.9	100140	157790	177560	9	9	9	9	9	9	9	9	9	27680	30043	33425	--
Lmhp206353	Tricin-4'-O-glucoside*	493.13	331.08	492.127	C23H24O12	[M+H]+	Flavonoids	-	3262800	3799100	3423200	6904000	8274400	9020600	7991600	7517800	8879000	514170	345310	382620	605720	809000	710640	810690	851960	622470	3433100	3413300	3255400	--
pmb0736	Tricin-7-O-Glucoside*	493.13	331.08	492.127	C23H24O12	[M+H]+	Flavonoids	32769-01-0	2990900	3886100	3586500	7387500	7807700	8940300	7708700	6947700	8962800	473920	343590	406690	638010	855450	743320	789480	773840	716980	3603400	3360800	3476600	--
Lmgp004829	5,7,4'-Trihydroxy-6,8-dimethoxyisoflavone-7-O-galactoside	493.13	331.08	492.127	C23H24O12	[M+H]+	Flavonoids	-	3087000	3885500	4208700	7801500	7786600	9115700	7987300	6688100	8966700	464240	333440	437700	610710	845820	700810	799640	839880	691930	3237600	2950700	3344900	--
pmp001164	Iristectorin B	493.13	316.1	492.127	C23H24O12	[M+H]+	Flavonoids	94396-09-5	830650	730470	958190	1530600	1654600	1784900	2329700	1671700	2166500	107290	83249	91345	159200	174700	148930	189210	197080	159060	738210	845490	765930	--
Hmgp002238	Jaceosidin-7-O-Glucoside	493.14	331.08	492.128	C23H24O12	[M+H]+	Flavonoids	25474-11-7	3491300	3877500	3428100	7478600	7717400	9085800	8378900	7093500	8695800	483210	324400	442230	625190	833210	747690	829580	867140	693230	3549200	3301500	3498800	--
Hmlp002821	Myricetin-3-O-glucuronide	495.08	319.04	494.07	C21H18O14	[M+H]+	Flavonoids	77363-65-6	11379	10377	23547	7899.4	5829.9	3711.1	25364	37112	38338	9	9	9	9	9	5313.3	6712.9	6823.3	6952.1	8567.9	5950.2	15151	--
HJAP005	Laricitrin-3-O-glucoside	495.11	333.07	494.105	C22H22O13	[M+H]+	Flavonoids	39986-90-8	187840	344030	313710	882880	922290	809480	5576500	2096600	6454500	224400	145860	163550	3087900	4004900	3664000	2418900	2685800	2284100	1669200	1579800	1703400	--
Lmtn002997	Mearnsetin-3-O-glucoside	493.1	331.05	494.106	C22H22O13	[M-H]-	Flavonoids	-	361030	286440	446690	9	9	9	193890	149370	91309	90909	78941	72505	9	9	9	52874	55781	40851	112980	101650	87012	--
Lmjp003231	Patuletin-3-O-glucoside	495.11	333.07	494.106	C22H22O13	[M+H]+	Flavonoids	-	176180	414530	252000	893670	909660	775870	5280700	1959100	5618500	190190	125640	153400	2818700	4471500	3220900	2022000	2381800	2010100	1312400	1473500	1469000	--
pma0825	Chrysin-7-O-(6''-malonyl)glucoside	503	255	502.111	C24H22O12	[M+H]+	Flavonoids	-	6786.5	8299.5	7823.2	28275	28322	34025	13592	9197.5	13315	9049	7678.4	9119.2	37740	65639	59080	47366	51570	46014	25857	21595	21628	--
pmn001642	Kaempferol-3-O-(2''-O-acetyl)glucuronide	503.08	459.1	504.09	C23H20O13	[M-H]-	Flavonoids	-	95330	210940	303530	837190	603110	940560	9	84720	9	964320	904690	716800	3787000	6510400	6482800	4084700	3537600	2429400	1133100	1540100	1467300	--
pmb3000	Chrysoeriol-7-O-(6''-acetyl)glucoside	503.12	341.1	504.127	C24H24O12	[M-H]-	Flavonoids	-	16073	17113	13855	5189.8	11019	7147.8	8081.9	11088	13943	23687	25185	23168	16090	24441	18431	13609	12181	18692	18474	18189	21137	--
pmb3045	Tricin-7-O-Glucuronide	505.1	329.1	506.106	C23H22O13	[M-H]-	Flavonoids	-	445770	259320	443140	361480	407040	255520	553110	747400	599300	181120	158470	213120	75985	67931	68334	134680	147120	132880	237950	247640	273950	--
Hmln002199	Quercetin-3-O-(6''-acetyl)galactoside	505.1	300.03	506.107	C23H22O13	[M-H]-	Flavonoids	-	541880	426820	445850	114560	148040	106530	108360	86808	232850	908480	400440	469050	532400	1294800	2093700	384260	507900	511590	388540	529210	426310	--
pmp000013	Eupatilin-7-O-glucoside	507.15	345.09	506.142	C24H26O12	[M+H]+	Flavonoids	-	2018700	1746700	2314400	2790800	3054900	3416900	12512000	9096100	13558000	670160	522210	580340	992560	1507300	1291100	1560600	1705100	1634000	3329100	3221000	3362300	--
Hmcp002399	Limocitrin-3-O-glucoside*	509.13	347.07	508.121	C23H24O13	[M+H]+	Flavonoids	-	844220	715110	844700	1100600	1170000	1287700	1235900	1055700	1396100	620000	566430	513360	1660600	2498100	1956800	1532500	1529000	1436300	1013800	1050500	1066400	--
Hmcp002187	Limocitrin-3-O-galactoside*	509.13	347.07	508.121	C23H24O13	[M+H]+	Flavonoids	-	117040	76454	90776	1417100	1435400	1855900	335620	278060	294020	1188000	1168000	930290	2997900	3546200	3125000	3978100	3956800	3687100	1420200	1434900	1321200	--
HJAP006	Syringetin-7-O-glucoside	509.13	347.08	508.122	C23H24O13	[M+H]+	Flavonoids	-	764630	626060	825190	1011600	1004400	1211000	1229000	985240	1317600	617630	577930	512860	1678500	2563200	2072500	1441600	1348500	1613600	965360	944240	1027100	--
Zmjp004852	5,6,3′,4′-Tetrahydroxy-3,7-dimethoxyflavone-6-O-glucoside	509.13	347.08	508.122	C23H24O13	[M+H]+	Flavonoids	-	111820	95857	9	1447200	1529200	1950300	321090	202670	255030	955860	1141300	945800	3392000	3580600	3019900	3951800	4553700	3645700	1212200	1335000	1270700	--
pmp000194	6''-O-Malonylgenistin	519.11	271.05	518.106	C24H22O13	[M+H]+	Flavonoids	51011-05-3	453250	383240	512380	908250	1044700	942000	141510	94785	178050	488730	373760	323810	1756700	2592800	2427200	2803100	3450700	2823600	988480	1090100	1018700	ko00943
pmp000585	Apigenin-7-O-(6''-malonyl)glucoside	519.11	433.11	518.106	C24H22O13	[M+H]+	Flavonoids	86546-87-4	24531	19608	28558	46178	61683	55968	11169	5511.1	11270	33748	23137	22121	95089	159650	131570	181240	191650	159300	57324	55757	54623	--
Li512111	Isorhamnetin-3-O-(6''-acetylglucoside)	519.11	315.05	520.122	C24H24O13	[M-H]-	Flavonoids	-	83593	59968	60435	626330	710110	451050	420350	340920	622950	22727	23921	27507	9	9	9	50845	65443	69334	183720	144620	120240	--
pma0791	Naringenin-7-O-(6''-malonyl)glucoside	521	273	520.122	C24H24O13	[M+H]+	Flavonoids	-	30458	26684	34018	81790	107110	114490	171040	104040	198600	28860	19181	20167	72931	120670	115250	159410	173180	155520	111180	98103	91247	--
Zmjp005610	Chrysosplenoside C*	523.14	361.09	522.137	C24H26O13	[M+H]+	Flavonoids	-	610020	515550	555590	458990	459780	508140	2249800	2049200	2596000	315780	250160	266330	514970	768360	639990	836330	789300	790700	737230	757320	767170	--
Zmjp005959	Chrysosplenoside A*	523.15	361.1	522.137	C24H26O13	[M+H]+	Flavonoids	-	640020	527250	588270	457080	472120	485190	2432600	1964100	2588200	320660	231580	271460	478730	746680	633960	782400	745280	831750	719100	719730	745750	--
pmp001165	Iridin	523.14	346.1	522.137	C24H26O13	[M+H]+	Flavonoids	491-74-7	9	9	9	7605.6	7208.5	7453.8	21650	11756	16075	7695.5	10162	6229.1	69037	79359	93276	139670	165860	154180	30319	35652	25013	--
Lmdp004892	Kaempferol-3-O-(6''-malonyl)galactoside	535.11	287.05	534.101	C24H22O14	[M+H]+	Flavonoids	-	105020	99664	141090	197860	224740	198300	155440	168500	269700	1590400	960060	717840	4935400	6513300	5538400	1473100	1655100	1341500	1346000	1566200	1230200	--
pmp000587	Luteolin-7-O-(6''-malonyl)glucoside	535.11	449.1	534.101	C24H22O14	[M+H]+	Flavonoids	-	80877	91093	90693	67921	73872	70020	8254.8	4120.6	15000	48092	32200	30859	73457	90918	78428	95584	128680	111970	56601	59773	63492	--
Lmtp002942	Apigenin-6,8-di-C-arabinoside*	535.14	499.12	534.137	C25H26O13	[M+H]+	Flavonoids	-	258110	82544	181300	1534500	2761900	1531600	34982	83328	45724	9	9	9	14345	20143	12557	24340	25174	12016	343410	351740	345780	--
pmp001110	Apigenin-6-C-xyloside-8-C-arabinoside*	535.14	517.13	534.137	C25H26O13	[M+H]+	Flavonoids	-	595870	190430	431340	2755000	4347700	2921600	22420	24964	12532	9	9	9	37113	9	9	9	9	9	738110	675240	697640	--
HJN084	Laricitrin-3-O-(6''-acetyl)glucoside	535.11	331.05	536.116	C24H24O14	[M-H]-	Flavonoids	-	9	9	9	7008.8	7676.9	9740.9	26547	6850.3	25082	6350.1	4893.6	4198.2	7504.5	13967	6362.4	4147.5	6346.2	5192.7	7216.8	7350	4895.3	--
pmb0686	Eriodictyol-7-O-(6''-malonyl)glucoside	537.12	289	536.117	C24H24O14	[M+H]+	Flavonoids	-	9	9	9	9	9	9	9	9	9	33651	17237	26157	106820	173990	135370	33536	28397	28807	29086	28267	30880	--
Zmjp006741	Chrysosplenoside E*	537.16	375.12	536.153	C25H28O13	[M+H]+	Flavonoids	-	192540	132110	196060	123540	144730	133470	1168100	1098900	1363100	235980	186850	206570	157780	202800	188880	245920	249600	214000	350570	331220	334210	--
Zmjp006451	Chrysosplenoside B*	537.16	375.11	536.153	C25H28O13	[M+H]+	Flavonoids	-	191390	141160	185330	115780	144480	129040	1130300	1021800	1364700	220350	178240	204070	144590	214190	199090	219370	231290	211580	343500	320680	334200	--
Zmhp006502	Kaempferide-3-O-(6''-malonyl)glucoside	549.12	301.07	548.117	C25H24O14	[M+H]+	Flavonoids	-	33109	7106	31618	13167	15136	19328	44995	30526	73259	335290	181450	214300	441540	609120	558690	224100	257430	211200	143480	149060	135960	--
pmb0608	Chrysoeriol-7-O-(6''-malonyl)glucoside	549.12	301.4	548.117	C25H24O14	[M+H]+	Flavonoids	-	1249200	1250000	1259500	1570000	1852900	1916500	383870	331360	499760	185110	161720	157770	1274800	1656600	1296800	1610600	1814800	1586300	1023100	969340	1086100	--
pmp000588	Diosmetin-7-O-(6''-malonyl)glucoside	549.12	463.12	548.117	C25H24O14	[M+H]+	Flavonoids	-	116690	110080	120400	87101	113870	102750	23851	18109	25677	15096	9814.9	11805	65775	87872	67109	88267	81851	77543	65838	67396	72124	--
Hmln002189	Quercetin-3-O-(6''-malonyl)galactoside*	549.09	505.11	550.096	C24H22O15	[M-H]-	Flavonoids	-	790000	828050	965300	287460	347160	276220	331060	155720	411360	1410400	1440400	1046500	1894100	2759700	2487000	1138400	1011700	1007100	1032000	1119300	1206700	--
pma0795	Tricetin-5-O-(6''-malonyl)glucoside	551	303.1	550.096	C24H22O15	[M+H]+	Flavonoids	-	117580	136430	152940	1030900	1254300	1353000	1543700	767910	1970600	21163	21245	21043	110450	106500	114890	145880	134760	140260	546140	507200	523740	--
pmp000589	Quercetin-7-O-(6''-malonyl)glucoside*	551.1	303.05	550.096	C24H22O15	[M+H]+	Flavonoids	-	529140	529430	671480	698750	647440	929930	340910	340080	472140	255400	220510	171020	9	9	9	165020	156430	158440	377830	391740	367030	--
Hmmn003659	Limocitrin-7-O-(6''-Acetyl)glucoside	549.12	345.06	550.132	C25H26O14	[M-H]-	Flavonoids	-	12505	10816	13282	40971	39111	33656	8745	5025.5	11795	13897	10340	8115.2	14574	33841	30226	26748	40954	34404	17308	19278	17520	--
pmb2979	Hesperetin-7-O-(6''-malonyl)glucoside	549.12	387.1	550.132	C25H26O14	[M-H]-	Flavonoids	-	276050	186970	248900	320900	331890	251230	278420	337680	258120	501540	359600	442900	502910	394560	428090	374660	371560	353120	353960	338610	328590	--
HJAP064	Isorhamnetin-3-O-(6''-malonylglucoside)	565.12	317.08	564.088	C25H24O15	[M+H]+	Flavonoids	-	280600	216960	312620	819470	1017600	1125600	391360	489220	462470	98444	70260	72002	172640	256320	197140	129800	123850	144300	306940	323830	308530	--
pma0760	3'-O-Methyltricetin-7-O-(6''-malonyl)glucoside	565	317	564.112	C25H24O15	[M+H]+	Flavonoids	-	98281	105580	121380	91347	131930	142810	116760	75977	136360	214720	174530	178260	977320	1432700	1216300	282870	246190	210180	281580	285170	273350	--
Zmhp005139	Tamarixetin-3-O-(6''-malonyl)glucoside	565.12	317.07	564.112	C25H24O15	[M+H]+	Flavonoids	-	107170	154180	129600	144450	156040	170630	140130	93477	152500	274720	197070	233520	1251400	1614300	1474500	360280	322690	270410	343960	336730	329910	--
mws1660	Schaftoside	565.16	529.13	564.123	C26H28O14	[M+H]+	Flavonoids	51938-32-0	32086	16751	38639	111170	127120	96668	116210	123120	119500	9	3641.8	9	4733.3	5619.6	4844.4	20481	8875	6676.3	67670	70541	66877	--
Zmjp003463	"Vitexin-2""-O-xyloside"	565.16	433.11	564.147	C26H28O14	[M+H]+	Flavonoids	-	876960	355150	829050	3037500	4579800	3740700	3911200	4604300	4110100	9682	92796	6794.3	133000	103590	98194	422130	233150	223880	1943700	1995600	1880400	--
Hmcp001858	Kaempferol-3-O-arabinoside-7-O-rhamnoside	565.15	287.05	564.147	C26H28O14	[M+H]+	Flavonoids	-	9550.3	13640	15568	19443	23802	14498	16434	20637	20281	9	9	9	9	9	9	9	9	9	9334.7	16159	12238	--
Lmtp002474	Apigenin-6-C-(2''-glucosyl)arabinoside*	565.16	427.1	564.148	C26H28O14	[M+H]+	Flavonoids	-	6417300	2682100	6048100	18329000	22244000	19635000	18354000	23247000	19592000	79573	634660	50710	996810	746590	741350	2888700	1614800	1668600	12291000	11658000	12536000	--
Lmtp002642	Apigenin-8-C-(2''-glucosyl)arabinoside*	565.16	457.11	564.148	C26H28O14	[M+H]+	Flavonoids	-	2735500	1164800	2491600	9269500	14068000	10663000	11710000	13414000	12164000	26122	284160	15811	439170	348760	294120	1166400	652830	731860	5393900	5879500	5721100	--
pmp000411	Genistein-8-C-apiosyl(1→6)glucoside	565.16	433.1	564.148	C26H28O14	[M+H]+	Flavonoids	-	814010	321180	747110	2209500	3392800	2747600	3007600	3232300	2948600	8689.9	82400	5684.8	122280	102250	95406	342110	169520	198380	1500300	1651100	1626200	--
Lmnp003080	Hispidulin-8-C-(2''-O-xylosyl)xyloside	565.16	433.11	564.148	C26H28O14	[M+H]+	Flavonoids	-	259250	338870	337370	359000	327660	393520	114200	68327	151250	300210	261850	276760	334200	449440	357870	326590	355400	358230	241240	226460	236380	--
HJN079	Pinocembrin-7-O-rutinoside*	563.18	255.07	564.184	C27H32O13	[M-H]-	Flavonoids	118985-31-2	9	9	9	4543.7	6217.7	4191.7	9280.4	7065.9	12067	9	9	9	2426.2	3512.5	2801.6	6607.3	4859.6	5021.3	4140.9	3371.9	2987.4	--
HJN076	Pinocembrin-7-O-neohesperidoside*	563.18	255.07	564.184	C27H32O13	[M-H]-	Flavonoids	13241-31-1	9	9	9	4902.3	5121	5432.2	9652.2	6961.1	14745	9	9	9	2708.8	4112.3	2819.7	5173.2	5439.5	4876.9	3357.9	3913.6	2492.7	--
Zmxp005470	Tricin-7-O-(6''-O-malonyl)glucoside	579.13	331.08	578.127	C26H26O15	[M+H]+	Flavonoids	-	946080	324650	756770	2201000	2400400	2366800	1741100	1500000	2027300	130640	92049	120300	179480	229530	205230	148620	138670	125890	834180	793180	838490	--
pmp000237	Apigenin-6-C-(2''-glucuronyl)xyloside	579.13	283.06	578.127	C26H26O15	[M+H]+	Flavonoids	-	155390	115030	167340	271980	235130	244310	243510	265770	432240	9	9	9	9	9	9	9	9	9	108970	106950	115440	--
Lmpp003930	Apigenin-7-O-(6''-p-Coumaryl)glucoside	579.15	271.06	578.142	C30H26O12	[M+H]+	Flavonoids	-	5079800	3297000	5170700	10389000	10609000	7564000	5027100	5088200	5248800	975860	755020	649840	2615500	2637300	2455200	6278300	8045000	6166400	4105500	4391800	4846000	--
mws0047	Apigenin-7-O-neohesperidoside (Rhoifolin)*	579.17	271.07	578.164	C27H30O14	[M+H]+	Flavonoids	17306-46-6	6044400	3177300	4827100	10389000	11462000	7400100	4355900	4900500	5586600	922250	686530	707860	2768800	3065800	2433800	6741900	8961000	6219100	4579300	4417800	4082200	ko00944
pme3227	Vitexin-2''-O-rhamnoside	579.17	433	578.164	C27H30O14	[M+H]+	Flavonoids	64820-99-1	7382.8	9521.5	5046.9	4185.1	3885.8	2812.6	5138.5	9	5849.9	3431.2	5997.2	14238	14655	26584	16387	4464.9	9585.5	44813	7294.2	6405.8	7259.9	ko00944
pme0368	Apigenin-7-O-rutinoside (Isorhoifolin)*	579.17	271.01	578.164	C27H30O14	[M+H]+	Flavonoids	552-57-8	5678600	3680000	5160300	10938000	11796000	7445000	4956200	5054500	5256500	1116700	794130	852230	3112800	3446300	2684100	6734400	7795300	6774000	4938100	4543900	4678800	--
Lmgp004474	Genistein-7-O-galactoside-rhamnose	579.17	271.06	578.164	C27H30O14	[M+H]+	Flavonoids	-	5669300	3191900	4869200	10847000	11709000	9400100	5526500	4901100	4958900	950250	724630	782290	2691400	3364900	2326300	5808800	8240900	6226500	4782800	4336900	5266800	--
pmp001111	Violanthin	579.17	561.16	578.164	C27H30O14	[M+H]+	Flavonoids	40581-17-7	11217	14216	14020	49599	82763	62203	75079	130180	93732	9	9	9	3661.2	9	9	9108.2	5801.1	9	22067	30493	22876	--
HJAP148	Kaempferol-3-O-sambubioside	581.15	287.06	580.142	C26H28O15	[M+H]+	Flavonoids	27661-51-4	6673500	7271300	8140400	3630000	2496200	4131900	1719900	1187200	2510900	2419600	2281800	2301200	3673700	4504900	3109300	2514300	2831000	2341100	3185800	3346200	3367000	--
pmb0566	Luteolin-7-O-glucoside-5-O-arabinoside	581.15	383.2	580.143	C26H28O15	[M+H]+	Flavonoids	-	12855	10618	20251	8200.8	6804.4	8488.8	9	9	9	7887.7	5549.1	4715.1	6174.8	11831	4081.4	4480.5	5045.2	4641.9	8570.1	4941.4	10498	--
mws0046	Naringenin-7-O-Neohesperidoside(Naringin)*	579.17	271.06	580.179	C27H32O14	[M-H]-	Flavonoids	10236-47-2	83982	60706	64578	139070	190000	189300	1555300	1529100	2181700	10003	12461	9588.5	15222	13289	11185	110250	110750	88350	257510	290280	232440	ko00941
mws1066	Naringenin-7-O-Rutinoside(Narirutin)*	579.17	271	580.179	C27H32O14	[M-H]-	Flavonoids	14259-46-2	85781	58489	60734	172210	270890	255590	2161800	2117100	2699100	8409.9	12656	7224.6	15969	13164	10235	135500	126700	112940	369260	344890	372380	--
Hmgp003641	Chrysoeriol-6-C-rhamnoside-7-O-rhamnoside	593.18	447.13	592.177	C28H32O14	[M+H]+	Flavonoids	-	20211	35715	38092	37032	26634	22944	899220	794320	929130	10343	13556	7821.1	38271	49415	39692	74280	78902	60141	185960	188370	185980	--
pmp001288	Acacetin-7-O-rutinoside (Linarin)	593.19	285.1	592.179	C28H32O14	[M+H]+	Flavonoids	480-36-4	32453	65630	68345	70889	59345	47976	1737300	1531100	1877500	14982	23952	11717	64259	92287	69570	132830	210400	116390	342810	355380	348680	--
Zmjp005293	Robinson-7-O-Neohesperidin	593.19	285.08	592.179	C28H32O14	[M+H]+	Flavonoids	-	18202	41459	38957	41021	27881	25851	1157200	1084800	1148100	9763.1	14108	6417.7	42187	63308	50912	89958	60061	73097	234660	232990	243430	--
pmb2586	Gallocatechin-(4α→8)-catechin	593.13	285.6	594.137	C30H26O13	[M-H]-	Flavonoids	-	31969	18260	20941	27535	34112	27942	19791	21873	18155	5892.5	3799.6	5380	9821.3	10642	7246.8	16939	13380	13455	13290	19951	13311	--
pmp000593	Luteolin-7-O-rutinoside*	595.17	449.1	594.158	C27H30O15	[M+H]+	Flavonoids	3563-98-2	9109400	5820500	6388000	8621800	10830000	9996600	6955800	5228500	6372400	1508300	1148600	1147800	3677000	3955800	3210300	4240300	4524100	4195600	5257400	5121700	5542600	--
Lmjp002867	Kaempferol-3-O-neohesperidoside*	595.17	287.05	594.158	C27H30O15	[M+H]+	Flavonoids	32602-81-6	241990	193460	207850	435560	519850	405410	1483900	1314400	1754800	1736000	1240100	1257000	18428000	22458000	19471000	12721000	15383000	13853000	5224400	6031200	5631500	--
pmp001079	Luteolin-7-O-neohesperidoside (Lonicerin)*	595.17	449.1	594.158	C27H30O15	[M+H]+	Flavonoids	25694-72-8	7800400	4946000	5097000	7199000	9375000	7467500	6665700	4319000	5250800	1269100	1093500	1083600	2824600	3293300	2912300	3567700	3882200	3526700	4412700	4788000	4356700	ko00944
Lmsp004247	Isorhamnetin-3-O-arabinoside-7-O-rhamnoside	595.17	317.07	594.158	C27H30O15	[M+H]+	Flavonoids	-	288950	270910	286300	368200	494640	311340	502650	549700	556080	9	3967.9	9	6738.9	9	2543	9	9	9	290520	232610	252250	--
Lmsp004670	Kaempferol-3-O-glucoside-7-O-rhamnoside*	595.17	287.06	594.158	C27H30O15	[M+H]+	Flavonoids	-	243320	198290	199040	459520	538700	415230	1442700	1336500	1868400	1850000	1298700	1231500	18068000	20224000	19543000	13392000	14854000	14104000	6303100	6152900	6341800	--
Lmnp002413	Luteolin-6-C-rhamnoside-7-O-glucoside*	595.17	449.11	594.158	C27H30O15	[M+H]+	Flavonoids	-	7263600	4866500	4935200	7307200	9005600	7574300	6549000	4490800	5217100	1274700	1077300	981330	2947400	3158800	2677600	3520500	3993900	3563800	4052100	3728500	4303800	--
pmp001106	Vitexin-2''-O-glucoside	595.17	577.16	594.158	C27H30O15	[M+H]+	Flavonoids	61360-94-9	72627	50263	87934	538160	815130	730910	599600	740670	718640	73952	62152	55417	567800	670030	600360	961640	1034100	945570	436390	415420	442400	ko00944
pme1665	Isovitexin-7-O-glucoside(Saponarin)	593.15	311	594.158	C27H30O15	[M-H]-	Flavonoids	20310-89-8	1901.3	2219.6	9	23688	32401	27258	29229	34474	30460	2572	2516.6	2377.8	15671	20322	20332	40762	41853	37873	15280	15395	15609	--
pme1605	Kaempferol-3-O-robinobioside(Biorobin)*	593.15	285	594.158	C27H30O15	[M-H]-	Flavonoids	17297-56-2	7412800	5302500	5050300	6987700	8317700	7277600	4980700	3711500	4296700	1269300	995650	1031300	1634100	2200400	2313200	3394200	3325100	2950400	3385900	3613700	3270700	--
Lmsn002815	Kaempferol-3-O-rutinoside(Nicotiflorin)	593.15	285.04	594.158	C27H30O15	[M-H]-	Flavonoids	17650-84-9	47676	41922	37745	66078	65855	59527	270950	206110	287890	64764	48797	49139	341630	420700	440840	612360	643550	618900	307770	308910	305470	ko00944,ko01110
mws1073	Apigenin-6,8-di-C-glucoside (Vicenin-2)	595.17	457.2	594.158	C27H30O15	[M+H]+	Flavonoids	23666-13-9	375020	281370	431150	2785100	4271600	3877800	3031400	3579800	3969000	429580	334140	298860	3108300	3824900	3297100	5761600	5774300	5526900	2522300	2240600	2348500	--
Hmmn004152	Neoeriocitrin	595.17	459.11	596.174	C27H32O15	[M-H]-	Flavonoids	13241-32-2	11757	7238.4	6259.9	67609	89355	94684	91387	93137	118030	9	9	9	9	3893.2	2678.9	9	2366.7	3754.2	39948	26390	36589	--
mws1519	Eriodictyol-7-O-Rutinoside (Eriocitrin)	595.17	287.06	596.174	C27H32O15	[M-H]-	Flavonoids	13463-28-0	269090	178340	189570	1820300	2570500	2286900	2097100	2318900	3784400	13346	15211	15804	61052	71572	68334	100670	109350	103410	773370	844620	984290	--
mws1661	Diosmetin-7-O-rutinoside (Diosmin)*	609.18	301	608.174	C28H32O15	[M+H]+	Flavonoids	520-27-4	23063000	12371000	18282000	15604000	28353000	12894000	39841000	48394000	38799000	82379	1071600	98058	541240	267140	218870	1072000	663900	516590	18251000	18598000	18337000	--
pmb3002	Chrysoeriol-7-O-rutinoside	607.17	299	608.174	C28H32O15	[M-H]-	Flavonoids	-	2097700	1066200	1330000	1395800	1980000	1083600	7116900	9824200	5016800	4055	98302	5418.8	13338	6613.5	4938.8	95361	44276	30602	1029700	1370900	1352200	--
pmp001080	Diosmetin-7-O-Neohesperidoside (Neodiosmin)*	609.18	463.12	608.174	C28H32O15	[M+H]+	Flavonoids	38665-01-9	11279000	6317400	9847900	9065800	14300000	7983000	23198000	29661000	22083000	44295	589700	29691	228550	130470	82118	672010	350640	248560	9147100	9132000	9489700	--
Hmgp002121	Hispidulin-7-O-(6''-O-p-Coumaroyl)Glucoside	609.18	463.08	608.176	C31H28O13	[M+H]+	Flavonoids	-	13305000	7506900	9948100	10541000	15411000	9020600	25958000	32448000	22386000	49240	612560	54492	228010	113700	103510	748600	336630	277320	9105100	9337700	10039000	--
Lmdp004267	Quercetin-3-O-(6''-p-Coumaroyl)glucoside*	611.14	147.04	610.132	C30H26O14	[M+H]+	Flavonoids	-	9	9	9	9	9	9	8512.9	6642.2	7678.3	8094	7771.3	6247	241700	334130	231530	202540	198250	189950	73835	68221	71048	--
Lmmp000897	Gallocatechin-(4α→8)-gallocatechin	611.14	287.05	610.132	C30H26O14	[M+H]+	Flavonoids	-	12793	20551	14270	31319	42736	32897	38193	24274	53877	25471	16510	13589	365870	638430	525290	452920	514420	462710	145450	143590	141080	--
Lmyp004052	Quercetin-3-O-(6''-p-Coumaroyl)galactoside*	611.14	147.04	610.132	C30H26O14	[M+H]+	Flavonoids	-	9	9	9	9	9	9	9418.6	6105.8	8978	8961.8	9676.5	5701.7	231860	325090	219450	186310	207730	193800	72037	72496	73708	--
pmb0624	Isoorientin-7-O-glucoside	611.16	431.3	610.153	C27H30O16	[M+H]+	Flavonoids	-	9723.5	14444	13573	52055	61515	69749	57928	31586	53374	3680.7	3708.7	2617.9	35969	48507	37737	75337	88435	73520	35115	34292	36313	--
mws0059	Quercetin-3-O-rutinoside (Rutin)*	609.15	301	610.153	C27H30O16	[M-H]-	Flavonoids	153-18-4	670350	734610	458970	1760600	1987300	1687300	12968000	5959300	11662000	2120300	2011500	1574800	11242000	13835000	11789000	11477000	11990000	12974000	6962900	6361700	6620900	ko00944,ko01100,ko01110
Hmpp002612	Luteolin-7-O-gentiobioside*	611.16	287.05	610.153	C27H30O16	[M+H]+	Flavonoids	-	6583100	7126900	8655700	9082300	8698200	11591000	4570300	2407000	5550600	6757400	5123200	5479500	9007600	11194000	10224000	7190800	8743700	6936400	6408600	6540300	6679900	--
Lmsp004166	Quercetin-3-O-glucoside-7-O-rhamnoside*	611.16	303.05	610.153	C27H30O16	[M+H]+	Flavonoids	-	1546900	2113200	1465900	4915800	5023100	4285100	31254000	16472000	29560000	6319300	5735900	4832200	32199000	38468000	34310000	28170000	31250000	27908000	18084000	17612000	17861000	--
pmb0711	Quercetin-7-O-rutinoside*	611.16	303.1	610.153	C27H30O16	[M+H]+	Flavonoids	147714-62-3	1792000	2083800	1260400	4481200	5014100	4580500	31203000	16494000	32063000	5855300	5822400	4917900	32337000	36138000	35743000	28644000	30325000	26070000	19858000	18681000	19749000	--
Zmxp003107	Luteolin-7,3'-di-O-glucoside*	611.16	287.06	610.153	C27H30O16	[M+H]+	Flavonoids	52187-80-1	6827600	7599400	8074700	10013000	9815500	11705000	5109100	2474900	5538000	7165800	5593800	5628500	9692000	11681000	9561600	7548000	8306900	6687400	6835600	7634100	7453700	--
pmp000126	Luteolin-6,8-di-C-glucoside	611.16	593.2	610.153	C27H30O16	[M+H]+	Flavonoids	29428-58-8	8726.1	9744.7	11306	116670	210130	188080	46921	72494	57828	121340	93080	87977	1141000	1346200	1160700	1776100	1806600	1662300	410060	433990	412070	--
Lmjp002461	Quercetin-3-O-neohesperidoside*	611.16	303.05	610.153	C27H30O16	[M+H]+	Flavonoids	117611-67-3	1783500	1821100	1184400	5000000	4750500	3939600	25935000	14863000	27264000	5846800	5248400	4756500	28609000	35181000	30869000	26863000	28067000	26301000	16928000	16599000	16384000	--
pmn001583	Quercetin-3-O-robinobioside*	609.15	300	610.153	C27H30O16	[M-H]-	Flavonoids	52525-35-6	703610	796090	532110	2329700	2167900	1999900	15276000	7144400	13149000	2590800	2041800	1780200	11641000	18522000	14763000	14720000	13862000	12688000	8214400	7807400	7641000	--
Lmmp003091	Quercetin-3-O-(4''-O-glucosyl)rhamnoside*	611.16	303.05	610.153	C27H30O16	[M+H]+	Flavonoids	59262-54-3	1753400	2083300	1362800	5340400	5332600	4732200	31125000	15148000	31494000	5939100	5935700	4977300	31589000	37921000	34524000	30494000	31588000	27633000	18394000	17272000	18591000	--
Lmbp002592	Kaempferol-3,7-di-O-glucoside	611.16	287.05	610.153	C27H30O16	[M+H]+	Flavonoids	-	5597700	6509400	8150100	9192100	8906100	9897200	4565100	2185400	4962100	6357400	5080300	5431300	8804000	11211000	9194000	6953800	7717100	6266500	6376800	6582500	7086400	--
mws0036	Hesperetin-7-O-rutinoside (Hesperidin)*	609.18	301.09	610.19	C28H34O15	[M-H]-	Flavonoids	520-26-3	15374	16262	8339.2	16676	21083	15442	53260	40929	20174	15217	14736	25744	8205	7499.7	7142.3	6836.5	10977	9463.4	20235	19185	12315	--
pme0001	Hesperetin-7-O-neohesperidoside(Neohesperidin)*	609.18	301	610.19	C28H34O15	[M-H]-	Flavonoids	13241-33-3	15657	20155	7804.7	11076	10589	11556	42933	23352	9	18363	14334	20093	13100	10544	9744.1	10388	12359	20370	18362	15197	12576	ko00941
pmp001290	Apigenin-7-O-(2''-glucurosyl)glucuronide	623.12	271.06	622.117	C27H26O17	[M+H]+	Flavonoids	74696-01-8	49105	49226	81200	325710	330240	242540	46408	43691	83866	84297	57054	77633	44728	36438	23458	26130	31538	20661	113700	116330	110090	--
Lmzn001664	Kaempferol-3-O-glucuronide-7-O-glucoside	623.13	447.1	624.133	C27H28O17	[M-H]-	Flavonoids	-	9	9	9	9	9	9	9	9	4111.9	9	9	950.24	18357	24766	19917	39042	39824	36248	7573.3	9683.7	11316	--
Hmjp002999	Isorhamnetin-3-O-rutinoside (Narcissin)*	625.18	317.06	624.162	C28H32O16	[M+H]+	Flavonoids	604-80-8	494600	576690	439050	1148800	1256600	1191400	5672700	2787200	5769100	671340	540750	520240	5573600	7651000	5790600	4382700	4503200	3947300	2307700	2305300	2208000	--
HJAP120	Rhamnetin-3-O-Rutinoside*	625.17	317.07	624.168	C28H32O16	[M+H]+	Flavonoids	-	484380	555200	530710	1200300	1175700	992740	4678600	2776400	5535100	655960	581580	528070	5379400	6688500	5651800	4238300	4187600	3876500	2280300	2370200	2149100	--
Lmmp002463	Sexangularetin-3-O-glucoside-7-O-rhamnoside	625.18	317.07	624.169	C28H32O16	[M+H]+	Flavonoids	-	484550	578340	444780	1144500	1289400	1102000	5608200	2708700	5574300	629800	595560	463790	5361100	7637900	6034000	4557900	4685300	3749000	2495100	2511300	2553200	--
pmp000127	Chrysoeriol-6,8-di-C-glucoside	625.18	607.2	624.169	C28H32O16	[M+H]+	Flavonoids	-	20150	21612	20120	136230	265520	207010	109080	143590	133950	160770	125520	128580	1268500	1567400	1432900	2268500	2358000	2144600	541490	518740	520460	--
Lmsp004721	Tamarixetin-3-O-glucoside-7-O-rhamnoside	625.18	317.07	624.169	C28H32O16	[M+H]+	Flavonoids	-	521580	612620	460340	1271900	1204600	1200500	5471800	3236000	6109900	671430	541170	526080	5770500	7433800	6511000	4441600	4556700	3991300	2336800	2441600	2432500	--
Lmhp003217	2'-Hydoxy,5-methoxyGenistein-O-rhamnosyl-glucoside	625.17	317.06	624.169	C28H32O16	[M+H]+	Flavonoids	-	459920	538980	469680	1172400	1277100	1118900	5319900	2881500	5609900	611930	527720	571300	5561700	7239100	6077600	4034400	4273900	3764600	2128000	2354600	2222200	--
pmp001311	6-Hydroxykaempferol-7,6-O-Diglucoside*	627.16	303.1	626.148	C27H30O17	[M+H]+	Flavonoids	-	201800	276330	178540	449980	473780	409080	202290	100510	214730	58476	57535	49304	387920	672860	637100	743290	826070	774310	303310	323080	329590	--
pmp001310	6-Hydroxykaempferol-3,6-O-Diglucoside*	627.16	303.1	626.148	C27H30O17	[M+H]+	Flavonoids	-	9	9	9	9	9	9	9	9	9	20193	12110	20288	184050	250830	194990	74278	107590	68495	56286	44747	52431	--
Lmtp003677	Quercetin-3-O-sophoroside (Baimaside)*	627.16	303.04	626.148	C27H30O17	[M+H]+	Flavonoids	18609-17-1	25170	33981	27974	160640	119740	171340	85390	34403	76073	9	9	13745	53812	62890	72479	74440	61947	68255	72648	59414	77872	ko00944
pmp000596	Quercetin-3-O-(2''-O-galactosyl)glucoside*	627.16	465.1	626.148	C27H30O17	[M+H]+	Flavonoids	56782-99-1	50649	46034	48521	146750	113740	161980	59732	29262	57752	9	9	9	59437	69772	73241	108400	103740	96016	80482	61511	60340	--
Lmzn001572	Scutellarein-7-O-glucuronosyl-(1->2)-glucuronide	637.11	351.06	638.112	C27H26O18	[M-H]-	Flavonoids	150641-65-9	182380	212920	187890	529490	719070	510290	96867	73079	168770	141330	113790	112270	75365	58188	26213	22950	34478	25607	175260	192910	168190	--
pmb0587	Chrysoeriol-7-O-(2''-O-glucuronyl)glucoside	639.16	477	638.148	C28H30O17	[M+H]+	Flavonoids	-	5857.6	5854.4	6959	13292	9223.6	7449.4	12992	14582	17338	9	9	3940.2	9	9	4460.5	13955	12177	12434	11167	8957.2	6264.9	--
Hmcp001578	Isorhamnetin-3,7-O-diglucoside*	641.17	479.11	640.163	C28H32O17	[M+H]+	Flavonoids	6758-51-6	51998	47021	47056	74691	102490	77825	157100	70400	182020	19457	14424	12474	131970	191650	164740	250040	264010	232000	107630	110440	104530	--
Lmsp003252	Isorhamnetin-3-O-sophoroside*	641.17	317.07	640.164	C28H32O17	[M+H]+	Flavonoids	-	73834	74164	69677	116490	177920	131960	212110	81710	219650	11685	9217.6	8770.8	216740	381240	336600	455050	488310	384840	156200	157820	151670	--
pmp001289	Chrysoeriol-7-O-(2''-O-glucuronyl)glucuronide	653.13	301.1	652.128	C28H28O18	[M+H]+	Flavonoids	-	449560	536820	644790	728910	922020	727500	1153400	1774300	1523900	52774	104030	53431	42178	15315	6424.1	67261	15834	13884	623780	580900	552160	--
pmb0716	Tricin-4'-O-glucoside-7-O-glucoside*	655.19	331.08	654.18	C29H34O17	[M+H]+	Flavonoids	-	351970	470670	408850	655940	601720	649520	698650	658460	905730	62861	46215	66154	90471	88919	84420	91586	88735	81889	287210	332620	402260	--
Zmxp004503	Tricin-5,7-O-diglucoside*	655.18	331.06	654.18	C29H34O17	[M+H]+	Flavonoids	-	1108900	1470300	1317300	1980600	1896300	2034300	2892300	2047800	2654500	175530	145370	182070	256550	296320	223400	251610	265820	216910	966760	844370	1086800	--
Lmsp004749	Syringetin-3-O-rutinoside	655.19	347.08	654.18	C29H34O17	[M+H]+	Flavonoids	-	125250	147590	137200	1145200	933220	895880	2727600	1856100	2432800	322130	280230	251410	817540	909340	753120	1146900	1136300	1214200	675920	847050	812840	--
Lmgp004539	5,7,4'-Trihydroxy-6,8-dimethoxyisoflavone-7-O-galactoside-glucoside	655.19	331.08	654.18	C29H34O17	[M+H]+	Flavonoids	-	1407100	1370500	1277200	2245400	2028900	2192000	3032000	2397400	3050500	212130	169360	209740	263870	352230	251000	267410	276540	270640	1064500	1018400	1052800	--
pmb0475	Gallic acid-4-O-(6'''-feruloyl)sophoroside	671.18	509	670.174	C29H34O18	[M+H]+	Tannins	-	186750	129580	202780	121760	134280	123590	254590	175970	238850	22594	13044	24794	17335	17840	19617	20578	30103	23664	73879	95711	112770	--
Hmgp001916	3,3',5,7-Tetrahydroxy-4',6-Dimethoxyflavone-7-O-Gentiobioside; (Laciniatin-7-O-Gentiobioside)	671.18	347.07	670.177	C29H34O18	[M+H]+	Flavonoids	-	670640	468850	690200	574310	507660	519790	953330	640030	911610	65715	66206	76687	81825	81039	66812	115200	129820	101850	385460	372680	366750	--
Hmcp001658	Isorhamnetin-3-O-(6''-malonylglucoside)-7-O-glucoside	727.17	479.11	726.164	C31H34O20	[M+H]+	Flavonoids	-	12674	13778	17010	8534.7	8891.6	8900.7	7150.3	2619.1	9136.9	12135	10535	7913.8	55183	57592	54529	18056	16608	18223	17573	19108	18833	--

## Sheet: Table S2
Table S2 K-means analysis of 299 differential flavonoid metabolites
Index	Sub Class	Formula	Compounds	Class	CAS	ARAE1	ARAE2	ARAE3	ARAM1	ARAM2	ARAM3	ARAL1	ARAL2	ARAL3	ARIE1	ARIE2	ARIE3	ARIM1	ARIM2	ARIM3	ARIL1	ARIL2	ARIL3
mws0024	1	C7H6O5	Gallic acid	Tannin	149-91-7	531870	403440	557650	2541500	2998500	2620400	241800	285790	277010	753440	563660	597400	3441000	5004000	4172900	167810	137840	167990
mws0040	1	C15H10O4	Chrysin	Flavonoid	480-40-0	128620	133230	147400	300620	263710	361380	301870	133100	186230	104450	75366	82673	285530	465280	363080	232430	246940	211970
mws0789	1	C15H12O4	Pinocembrin (Dihydrochrysin)	Dihydroflavone	480-39-7	51053	50411	49685	105100	100390	128710	110450	63577	97382	37106	34980	35797	90367	127970	114910	80753	76905	55611
mws1662	1	C16H12O4	Tectochrysin	Flavonoid	520-28-5	40447	39020	42968	95615	87543	136560	93430	34986	56266	27349	24839	24567	103980	149610	133350	75735	85601	62947
mws1174	1	C17H14O6	3-O-Acetylpinobanksin	Dihydroflavonol	52117-69-8	789330	925620	898010	1627800	1298400	2531300	1892600	600330	1072300	641940	575430	660130	2163500	2815300	2397000	1756100	1962600	1464100
pmf0392	1	C17H16O6	Persicogenin (5,3'-dihydroxy-7,4'-dimethoxyflavanone)	Dihydroflavone	28590-40-1	3764.9	4084.1	2956	42811	54434	42583	31745	26486	36252	12159	7426.1	6815.2	71048	72175	56343	46272	43390	38989
HJN055	1	C21H24O10	Dihydrocharcone-4'-O-glucoside	Chalcones	-	9	9	9	41488	36410	30618	26916	27577	31056	16452	6579.8	6687	28677	29815	31837	18190	16825	17418
Zmhn001257	1	C21H24O11	Catechin-5-O-glucoside	Flavanols	-	9	9	9	18950	22962	23481	9525.1	7348.7	13419	9	9	9	13908	22288	11599	9	9	3790.6
pmb0608	1	C25H24O14	Chrysoeriol-7-O-(6''-malonyl)glucoside	Flavonoid	-	1249200	1250000	1259500	1570000	1852900	1916500	383870	331360	499760	185110	161720	157770	1274800	1656600	1296800	1610600	1814800	1586300
Hmmn003659	1	C25H26O14	Limocitrin-7-O-(6''-Acetyl)glucoside	Flavonols	-	12505	10816	13282	40971	39111	33656	8745	5025.5	11795	13897	10340	8115.2	14574	33841	30226	26748	40954	34404
Lmnp003080	1	C26H28O14	Hispidulin-8-C-(2''-O-xylosyl)xyloside	Flavonoid carbonoside	-	259250	338870	337370	359000	327660	393520	114200	68327	151250	300210	261850	276760	334200	449440	357870	326590	355400	358230
Hmpp002612	1	C27H30O16	Luteolin-7-O-gentiobioside*	Flavonoid	-	6583100	7126900	8655700	9082300	8698200	11591000	4570300	2407000	5550600	6757400	5123200	5479500	9007600	11194000	10224000	7190800	8743700	6936400
Zmxp003107	1	C27H30O16	Luteolin-7,3'-di-O-glucoside*	Flavonoid	52187-80-1	6827600	7599400	8074700	10013000	9815500	11705000	5109100	2474900	5538000	7165800	5593800	5628500	9692000	11681000	9561600	7548000	8306900	6687400
Lmbp002592	1	C27H30O16	Kaempferol-3,7-di-O-glucoside	Flavonoid	-	5597700	6509400	8150100	9192100	8906100	9897200	4565100	2185400	4962100	6357400	5080300	5431300	8804000	11211000	9194000	6953800	7717100	6266500
Lmdp003808	2	C16H12O7	Azaleatin (5-O-Methylquercetin)	Flavonols	529-51-1	23751	38347	31861	46018	51489	41535	93270	59055	91516	28014	25325	22667	288890	389440	363110	156590	129750	137370
Lmbp003668	2	C20H18O10	Kaempferol-3-O-arabinoside	Flavonoid	-	41763	62065	48368	70958	64174	53044	61392	65529	86469	34827	25852	27945	434110	675670	462660	334970	390650	339470
mws0355	2	C22H18O10	Catechin gallate*	Flavanols	130405-40-2	44065	38361	41697	43657	40452	41228	22296	19428	16864	100210	67570	65512	65588	72251	74948	40957	34663	39140
mws1397	2	C22H18O10	Epicatechin gallate*	Flavanols	1257-08-5	41455	29366	40130	50353	33873	42810	34900	19643	21469	95180	69399	71521	78276	79307	79004	35845	45783	38954
mws0052	2	C21H18O11	Baicalin	Flavonoid	21967-41-9	659770	768880	1186300	2608400	2384800	2139600	1942800	2403100	3580800	3248800	2482200	2792400	9283700	9966600	8344500	6298800	7913900	6861000
mws2209	2	C21H20O11	Kaempferol-3-O-glucoside (Astragalin)*	Flavonols	480-10-4	731880	835720	726480	426920	418080	463410	945090	917350	1342300	1899500	932800	989550	17919000	24940000	18841000	12053000	12300000	10601000
pmp000012	2	C21H18O12	Scutellarein-7-O-glucuronide (Scutellarin)	Flavonoid	27740-01-8	7534400	7795700	7819500	9252600	9219200	9127700	5270500	4869300	6667300	11872000	11120000	10734000	22462000	23998000	22621000	16270000	19446000	19481000
mws4167	2	C21H18O12	Luteolin-7-O-glucuronide	Flavonoid	29741-10-4	7207800	8156200	9018600	8531400	8947200	9047700	4804100	4408000	6907600	11295000	9733900	11548000	21722000	27519000	21826000	17976000	23037000	18874000
Lmmp002795	2	C22H22O11	Pratensein-7-O-glucoside	Flavonoid	36191-03-4	30680	10527	28123	21234	23536	29430	67393	41299	91161	397530	199330	312900	266810	365730	314070	215950	227890	204090
Lmmn003398	2	C23H22O12	Kaempferol-3-O-(6''-acetyl)glucoside	Flavonols	-	20354	19480	25093	37095	33081	30861	21843	39526	46105	491910	305120	283580	1003700	1042400	1483800	459950	642670	489960
pmn001642	2	C23H20O13	Kaempferol-3-O-(2''-O-acetyl)glucuronide	Flavonols	-	95330	210940	303530	837190	603110	940560	9	84720	9	964320	904690	716800	3787000	6510400	6482800	4084700	3537600	2429400
Hmln002199	2	C23H22O13	Quercetin-3-O-(6''-acetyl)galactoside	Flavonols	-	541880	426820	445850	114560	148040	106530	108360	86808	232850	908480	400440	469050	532400	1294800	2093700	384260	507900	511590
Lmdp004892	2	C24H22O14	Kaempferol-3-O-(6''-malonyl)galactoside	Flavonols	-	105020	99664	141090	197860	224740	198300	155440	168500	269700	1590400	960060	717840	4935400	6513300	5538400	1473100	1655100	1341500
pmb0686	2	C24H24O14	Eriodictyol-7-O-(6''-malonyl)glucoside	Dihydroflavone	-	9	9	9	9	9	9	9	9	9	33651	17237	26157	106820	173990	135370	33536	28397	28807
Zmhp006502	2	C25H24O14	Kaempferide-3-O-(6''-malonyl)glucoside	Flavonoid	-	33109	7106	31618	13167	15136	19328	44995	30526	73259	335290	181450	214300	441540	609120	558690	224100	257430	211200
Hmln002189	2	C24H22O15	Quercetin-3-O-(6''-malonyl)galactoside*	Flavonols	-	790000	828050	965300	287460	347160	276220	331060	155720	411360	1410400	1440400	1046500	1894100	2759700	2487000	1138400	1011700	1007100
pma0760	2	C25H24O15	3'-O-Methyltricetin-7-O-(6''-malonyl)glucoside	Flavonoid	-	98281	105580	121380	91347	131930	142810	116760	75977	136360	214720	174530	178260	977320	1432700	1216300	282870	246190	210180
Zmhp005139	2	C25H24O15	Tamarixetin-3-O-(6''-malonyl)glucoside	Flavonoid	-	107170	154180	129600	144450	156040	170630	140130	93477	152500	274720	197070	233520	1251400	1614300	1474500	360280	322690	270410
pme3227	2	C27H30O14	Vitexin-2''-O-rhamnoside	Flavonoid carbonoside	64820-99-1	7382.8	9521.5	5046.9	4185.1	3885.8	2812.6	5138.5	9	5849.9	3431.2	5997.2	14238	14655	26584	16387	4464.9	9585.5	44813
Lmjp002867	2	C27H30O15	Kaempferol-3-O-neohesperidoside*	Flavonols	32602-81-6	241990	193460	207850	435560	519850	405410	1483900	1314400	1754800	1736000	1240100	1257000	18428000	22458000	19471000	12721000	15383000	13853000
Lmsp004670	2	C27H30O15	Kaempferol-3-O-glucoside-7-O-rhamnoside*	Flavonols	-	243320	198290	199040	459520	538700	415230	1442700	1336500	1868400	1850000	1298700	1231500	18068000	20224000	19543000	13392000	14854000	14104000
Lmdp004267	2	C30H26O14	Quercetin-3-O-(6''-p-Coumaroyl)glucoside*	Flavonols	-	9	9	9	9	9	9	8512.9	6642.2	7678.3	8094	7771.3	6247	241700	334130	231530	202540	198250	189950
Lmmp000897	2	C30H26O14	Gallocatechin-(4α→8)-gallocatechin	Flavanols	-	12793	20551	14270	31319	42736	32897	38193	24274	53877	25471	16510	13589	365870	638430	525290	452920	514420	462710
Lmyp004052	2	C30H26O14	Quercetin-3-O-(6''-p-Coumaroyl)galactoside*	Flavonols	-	9	9	9	9	9	9	9418.6	6105.8	8978	8961.8	9676.5	5701.7	231860	325090	219450	186310	207730	193800
pmp001310	2	C27H30O17	6-Hydroxykaempferol-3,6-O-Diglucoside*	Flavonols	-	9	9	9	9	9	9	9	9	9	20193	12110	20288	184050	250830	194990	74278	107590	68495
Hmcp001658	2	C31H34O20	Isorhamnetin-3-O-(6''-malonylglucoside)-7-O-glucoside	Flavonols	-	12674	13778	17010	8534.7	8891.6	8900.7	7150.3	2619.1	9136.9	12135	10535	7913.8	55183	57592	54529	18056	16608	18223
pme0376	3	C15H12O5	Naringenin (5,7,4'-Trihydroxyflavanone)	Dihydroflavone	480-41-1	1072900	731780	892580	2506400	3144900	2683600	9525200	10096000	14186000	485420	374630	429400	559720	582640	523410	873410	732420	700640
pme2960	3	C15H12O5	Naringenin chalcone	Chalcones	73692-50-9	978620	680920	811380	1935900	2444900	2087200	7039400	7492200	9680000	429740	367970	415830	492350	521970	458760	580540	497820	510090
mws0914	3	C15H12O5	Pinobanksin	Dihydroflavonol	548-82-3	1082300	721840	900140	2354600	3149900	2538200	9372200	9940200	14318000	480790	374870	452010	582790	620780	518980	868340	729430	700430
pme3475	3	C15H12O5	Butin	Dihydroflavone	492-14-8	967550	667130	775140	1923300	2413700	2200100	6700500	7696500	10443000	453580	348740	409850	528540	504610	458800	565570	491710	461030
pme1201	3	C15H14O5	Phloretin	Chalcones	60-82-2	9	9	9	9	9	9	71592	54089	88769	9	9	9	2983	9	9	4435.2	5402.3	4400
mws0129	3	C16H12O5	Genkwanin (Apigenin 7-methyl ether)	Flavonoid	437-64-9	64772	72333	50850	164440	163530	132650	2124800	1902800	2505600	41385	47936	36911	76724	89755	68642	107380	102880	104140
mws0051	3	C16H12O5	Acacetin	Flavonoid	480-44-4	70338	67237	47144	166250	137310	136380	2098700	2024800	2468700	40489	56283	38052	73021	80555	68662	103610	102050	104000
mws4160	3	C16H12O5	Wogonin (5,7-Dihydroxy-8-Methoxyflavone)	Flavonoid	632-85-9	56278	56687	38177	132890	120760	101760	1568900	1462000	1981800	36729	46198	29314	73238	72832	55118	93966	101410	99420
mws0918	3	C16H12O5	Prunetin (5,4'-Dihydroxy-7-methoxyisoflavone)	Isoflavones	552-59-0	255180	242900	154220	596150	559510	462210	10819000	11531000	13148000	147480	224270	128440	321910	349970	299280	326630	291370	276410
Hmyp008708	3	C16H12O5	Izalpinin	Flavonols	480-14-8	31236	28488	18108	61661	63594	49451	841290	802170	1038100	15875	19029	15487	36210	32395	28386	31246	26874	23057
pme3250	3	C16H12O5	Biochanin A	Isoflavones	491-80-5	53098	51562	37496	130890	120040	102770	1608300	1488100	2118000	37885	43872	30159	58980	67218	57403	93878	98553	93587
mws1094	3	C15H12O6	Aromadendrin (Dihydrokaempferol)	Dihydroflavonol	480-20-6	7862.9	6025.2	7949.3	12332	13337	11985	93134	88226	160010	8516.4	6530.1	6883	18165	17652	12084	31613	29222	26507
Cmxp004977	3	C15H12O6	Isookanin	Dihydroflavone	-	9	9	9	9	9	9	30532	29187	49742	4468.9	9	3066.1	7125.1	6072.2	5943.4	9751.6	10138	6527.3
pmp001204	3	C17H14O5	Apigenin-7,4'-dimethyl ether	Flavonoid	5128-44-9	2536.2	3142.6	1921.7	8158	6893.4	8546.5	948920	638280	776480	2515.4	4203.9	1954	6940.4	9848.5	6707.3	9923.5	9999.4	6576.4
pme2246	3	C14H6O8	Ellagic acid	Tannin	476-66-4	3938.1	4622.9	9	27299	27899	16782	49570	102900	72162	9	9	9	9	9	9	9	9	9
mws0044	3	C15H12O7	Dihydroquercetin(Taxifolin)	Dihydroflavonol	480-18-2	71807	76908	109580	158910	150520	137740	745020	783990	878950	37819	34711	42501	50994	53541	41690	107880	122260	114690
Lmmn004912	3	C16H12O7	3-O-Methylquercetin	Flavonols	1486-70-0	43304	36946	53116	19677	18597	24405	754930	690720	896820	14398	10493	10422	33633	34725	37965	83075	85361	90800
Lmfp001509	3	C13H16O9	1-O-Galloyl-rhamnose	Tannin	-	6666.8	6369.2	7743.9	2915.7	4321.6	3261.6	6602.7	6965.4	7053.2	5285.5	3563.3	4329.2	2397.7	2923.5	2345.1	5012.8	6450.2	5711.4
Lmsp009013	3	C17H16O6	4',6-Dihydroxy-5,7-dimethoxyflavanone	Dihydroflavone	6951-57-1	6348.1	9562.7	10544	20360	12802	13702	63869	83126	65578	9	9	9	9	6100.1	9	9	9	9
Zmjp008503	3	C18H16O6	Salvigenin	Flavonoid	19103-54-9	19981	29545	34701	92380	143540	102250	4165400	2566300	5295800	4258.9	9536.6	3279.4	5004.9	4829	3996.4	34214	6475.8	4433.1
Lmsp011263	3	C18H16O6	6-Hydroxy-5,7,4'-trimethoxyflavone	Flavonoid	6938-19-8	5420	7817.2	9322.4	23536	39186	28635	1147300	697220	1423500	1379.1	2579.6	1025.2	1600.5	1556.9	1614.1	9207	1918.6	2414.7
Lmsp008264	3	C18H16O6	4'-Hydroxy-5,6,7-trimethoxyflavone	Flavonoid	6938-18-7	9	3186	2907.4	2500.4	2671.7	1565.7	10676	16351	13303	9	9	9	9	9	9	9	9	9
Lmjp005016	3	C17H14O7	Cirsiliol (3',4',5-Trihydroxy-6,7-Dimethoxyflavone)	Flavonoid	34334-69-5	1799000	1441300	2517500	2857400	2787200	2310100	14689000	16076000	18226000	64261	123120	37603	105570	64504	62380	205880	92422	64231
pmp000008	3	C19H18O7	5-Hydroxy-6,7,3',4'-tetramethoxyflavone	Flavonoid	21763-80-4	155150	210040	180460	579670	508420	417660	11664000	8318300	15860000	14799	27781	10833	44050	41357	34524	179420	60793	54850
Lmsp010393	3	C19H18O7	Eupatorin-5-methylether (3'-hydroxy-5,6,7,4'-tetramethoxyflavone)	Flavonoid	21764-09-0	69692	94223	80967	259500	225250	183000	5573700	3802000	7456400	5831.4	11526	4374.5	16685	16885	14120	73126	23251	20270
Lmjp007279	3	C19H18O7	Penduletin 4'-Methyl Ether (5-Hydroxy-3,6,7,4'-Tetramethoxyflavone)	Flavonoid	14787-34-9	9	9	9	3416.9	4431.4	4203.3	21383	13977	26015	9	9	9	9	9	9	9	9	9
pmp000789	3	C19H18O8	Casticin (5,3'-Dihydroxy-3,6,7,4'-Tetramethoxyflavone)	Dihydroflavone	479-91-4	1078500	1050600	1352500	1482000	1300400	1069100	5221700	5638800	5677200	350220	294810	285550	676500	759950	706280	816270	890010	862630
Lmjp006769	3	C20H20O8	Artemetin (5-Hydroxy-3,3',4',6,7-pentamethoxyflavone)	Flavonoid	479-90-3	302490	451440	296320	249900	253170	196610	11203000	8697900	15516000	5495	25098	3547	7450.8	5404.4	3816.7	107880	13237	6118
pmp000113	3	C20H20O8	5-Hydroxy-6,7,8,3',4'-pentamethoxyflavone	Flavonoid	2174-59-6	494590	697490	479020	400090	417580	310060	17158000	13851000	22918000	9239.3	39656	4978.1	13113	7446.4	7439.5	168430	22155	9560.8
pma6218	3	C21H22O9	O-MethylNaringenin-8-C-arabinoside	Flavonoid	-	16644	7462.7	11257	12626	9287.1	19964	28027	47937	42712	9	9	6532.4	9	9	9	19264	24123	9
HJN090	3	C21H22O10	Butin-7-O-glucoside	Flavonoid	-	22894	15440	12512	33487	75486	40450	253860	249340	392590	3615.8	4256.8	4080.9	7511.4	6991.1	9	13770	8028.9	9
HJN087	3	C21H22O10	Naringenin-4'-O-glucoside*	Flavonoid	-	26145	11874	16996	37138	72570	46230	277590	266550	434430	5588.7	4102.6	4817.4	6882.2	9011.1	7469.9	8437.9	7388.1	6551.7
Hmhp004295	3	C22H20O11	Wogonin-7-O-Glucuronide (Wogonoside)	Flavonoid	51059-44-0	9	9	9	4274	5180.7	4772.9	34553	51927	50362	9	2413.2	1758.6	9	9	9	9	9	9
pmp000577	3	C26H20O8	Acacetin-7-O-glucuronide	Flavonoid	-	9	1850.1	9	3262.9	5491.7	4387.6	39712	60060	56300	9	2463.5	3647.3	2774.3	9	2630.1	1633.4	2291.9	9
Lmmp003783	3	C21H18O13	Quercetin-3-O-glucuronide*	Flavonols	22688-79-5	216210	162940	166560	695410	1116600	800050	2051700	2576500	3647100	13885	9693.2	13065	18164	17399	14954	16455	14615	19276
Zmhp002964	3	C23H22O12	5,7-Dihydroxy-6,8-dimethoxyflavone-7-O-glucoside	Flavonoid	-	9	9	9	6902.7	5500.8	4335.9	100140	157790	177560	9	9	9	9	9	9	9	9	9
Hmlp002821	3	C21H18O14	Myricetin-3-O-glucuronide	Flavonols	77363-65-6	11379	10377	23547	7899.4	5829.9	3711.1	25364	37112	38338	9	9	9	9	9	5313.3	6712.9	6823.3	6952.1
pmp000013	3	C24H26O12	Eupatilin-7-O-glucoside	Flavonoid	-	2018700	1746700	2314400	2790800	3054900	3416900	12512000	9096100	13558000	670160	522210	580340	992560	1507300	1291100	1560600	1705100	1634000
Zmjp005610	3	C24H26O13	Chrysosplenoside C*	Flavonoid	-	610020	515550	555590	458990	459780	508140	2249800	2049200	2596000	315780	250160	266330	514970	768360	639990	836330	789300	790700
Zmjp005959	3	C24H26O13	Chrysosplenoside A*	Flavonoid	-	640020	527250	588270	457080	472120	485190	2432600	1964100	2588200	320660	231580	271460	478730	746680	633960	782400	745280	831750
Zmjp006741	3	C25H28O13	Chrysosplenoside E*	Flavonoid	-	192540	132110	196060	123540	144730	133470	1168100	1098900	1363100	235980	186850	206570	157780	202800	188880	245920	249600	214000
Zmjp006451	3	C25H28O13	Chrysosplenoside B*	Flavonoid	-	191390	141160	185330	115780	144480	129040	1130300	1021800	1364700	220350	178240	204070	144590	214190	199090	219370	231290	211580
mws0046	3	C27H32O14	Naringenin-7-O-Neohesperidoside(Naringin)*	Dihydroflavone	10236-47-2	83982	60706	64578	139070	190000	189300	1555300	1529100	2181700	10003	12461	9588.5	15222	13289	11185	110250	110750	88350
mws1066	3	C27H32O14	Naringenin-7-O-Rutinoside(Narirutin)*	Dihydroflavone	14259-46-2	85781	58489	60734	172210	270890	255590	2161800	2117100	2699100	8409.9	12656	7224.6	15969	13164	10235	135500	126700	112940
Hmgp003641	3	C28H32O14	Chrysoeriol-6-C-rhamnoside-7-O-rhamnoside	Flavonoid	-	20211	35715	38092	37032	26634	22944	899220	794320	929130	10343	13556	7821.1	38271	49415	39692	74280	78902	60141
pmp001288	3	C28H32O14	Acacetin-7-O-rutinoside (Linarin)	Flavonoid	480-36-4	32453	65630	68345	70889	59345	47976	1737300	1531100	1877500	14982	23952	11717	64259	92287	69570	132830	210400	116390
Zmjp005293	3	C28H32O14	Robinson-7-O-Neohesperidin	Flavonoid	-	18202	41459	38957	41021	27881	25851	1157200	1084800	1148100	9763.1	14108	6417.7	42187	63308	50912	89958	60061	73097
pmb3002	3	C28H32O15	Chrysoeriol-7-O-rutinoside	Flavonoid	-	2097700	1066200	1330000	1395800	1980000	1083600	7116900	9824200	5016800	4055	98302	5418.8	13338	6613.5	4938.8	95361	44276	30602
mws0036	3	C28H34O15	Hesperetin-7-O-rutinoside (Hesperidin)*	Dihydroflavone	520-26-3	15374	16262	8339.2	16676	21083	15442	53260	40929	20174	15217	14736	25744	8205	7499.7	7142.3	6836.5	10977	9463.4
Zmhp002734	4	C17H14O8	5,7,2',5'-Tetrahydroxy-8,6'-dimethoxyflavone*	Flavonoid	-	950770	918270	1155100	4370000	4320900	5400900	1418200	1169700	2026500	118470	33786	31547	131210	145030	124210	208110	297460	220030
Hmcp003223	4	C17H14O8	Limocitrin (5,7,4'-trihydroxy-8,3'-dimethoxyflavone)	Flavonoid	489-33-8	644510	587690	760530	2424000	2359600	1957900	840460	1120500	1153600	424220	337080	407610	1280200	1335900	1252900	1268500	1094600	1147800
Hmgp003163	4	C17H14O8	3,3',5,7-Tetrahydroxy-4',6-Dimethoxyflavone; (Laciniatin)*	Flavonols	74161-28-7	637340	573890	768710	2236100	2224700	1823300	840170	1146800	1145000	455960	363730	407650	1213400	1324300	1265500	1264800	1105600	1128800
Zmjp008548	4	C18H16O8	Chrysosplenol F*	Flavonoid	-	481480	450960	565400	1769000	1827100	1368700	632490	801360	639220	179080	146110	151340	461770	390910	429790	498460	569000	578680
Lmtp002942	4	C25H26O13	Apigenin-6,8-di-C-arabinoside*	Flavonoid carbonoside	-	258110	82544	181300	1534500	2761900	1531600	34982	83328	45724	9	9	9	14345	20143	12557	24340	25174	12016
pmp001110	4	C25H26O13	Apigenin-6-C-xyloside-8-C-arabinoside*	Flavonoid carbonoside	-	595870	190430	431340	2755000	4347700	2921600	22420	24964	12532	9	9	9	37113	9	9	9	9	9
HJAP064	4	C25H24O15	Isorhamnetin-3-O-(6''-malonylglucoside)	Flavonoid	-	280600	216960	312620	819470	1017600	1125600	391360	489220	462470	98444	70260	72002	172640	256320	197140	129800	123850	144300
Lmpp003930	4	C30H26O12	Apigenin-7-O-(6''-p-Coumaryl)glucoside	Flavonoid	-	5079800	3297000	5170700	10389000	10609000	7564000	5027100	5088200	5248800	975860	755020	649840	2615500	2637300	2455200	6278300	8045000	6166400
mws0047	4	C27H30O14	Apigenin-7-O-neohesperidoside (Rhoifolin)*	Flavonoid	17306-46-6	6044400	3177300	4827100	10389000	11462000	7400100	4355900	4900500	5586600	922250	686530	707860	2768800	3065800	2433800	6741900	8961000	6219100
pme0368	4	C27H30O14	Apigenin-7-O-rutinoside (Isorhoifolin)*	Flavonoid	552-57-8	5678600	3680000	5160300	10938000	11796000	7445000	4956200	5054500	5256500	1116700	794130	852230	3112800	3446300	2684100	6734400	7795300	6774000
Lmgp004474	4	C27H30O14	Genistein-7-O-galactoside-rhamnose	Isoflavones	-	5669300	3191900	4869200	10847000	11709000	9400100	5526500	4901100	4958900	950250	724630	782290	2691400	3364900	2326300	5808800	8240900	6226500
pmp001290	4	C27H26O17	Apigenin-7-O-(2''-glucurosyl)glucuronide	Flavonoid	74696-01-8	49105	49226	81200	325710	330240	242540	46408	43691	83866	84297	57054	77633	44728	36438	23458	26130	31538	20661
Lmtp003677	4	C27H30O17	Quercetin-3-O-sophoroside (Baimaside)*	Flavonols	18609-17-1	25170	33981	27974	160640	119740	171340	85390	34403	76073	9	9	13745	53812	62890	72479	74440	61947	68255
pmp000596	4	C27H30O17	Quercetin-3-O-(2''-O-galactosyl)glucoside*	Flavonols	56782-99-1	50649	46034	48521	146750	113740	161980	59732	29262	57752	9	9	9	59437	69772	73241	108400	103740	96016
mws1068	5	C15H10O6	Kaempferol (3,5,7,4'-Tetrahydroxyflavone)	Flavonols	520-18-3	84763	49771	99282	98868	83291	84733	193050	180720	225270	48733	38108	39712	108400	106080	89463	95195	99850	97613
pme2954	5	C15H10O7	Quercetin	Flavonols	117-39-5	36931	31943	40271	60624	48910	41022	81330	74129	96080	20407	19495	18196	52006	46799	56581	36880	42672	44134
mws1033	5	C16H14O6	Homoeriodictyol	Dihydroflavone	446-71-9	338610	335010	279050	1261500	1426800	1415200	2032800	2397200	2679800	114520	109440	108810	403670	381490	374900	482570	502380	504030
mws0463	5	C16H14O6	Hesperetin	Dihydroflavone	520-33-2	210230	195630	182280	969380	1255700	1059300	1709600	1905500	2146100	69565	59676	60284	217450	221290	206730	337630	333810	332850
Lmsp008392	5	C17H14O6	4',5-Dihydroxy-3',5'-dimethoxyflavone*	Flavonoid	-	23028	15741	30375	67822	95214	79855	196810	169280	249050	7132.1	6733.9	7350.8	28071	33738	26360	43756	43895	43598
pmp000003	5	C16H12O7	Nepetin (5,7,3',4'-Tetrahydroxy-6-methoxyflavone)	Flavonoid	520-11-6	2606600	1732900	3535100	6263000	7685400	7366600	10036000	9534000	12867000	588930	359910	389660	2212000	2614400	2340000	4000800	4085200	3906500
Lmxn007955	5	C18H16O8	Sudachitin*	Flavonoid	4281-28-1	2322500	1890000	2602000	4461400	4319300	3605100	8948500	9196000	10777000	837100	641760	747600	2000900	2042500	2011700	2791600	2798800	2836200
Zmhp004269	5	C19H18O8	Skullcapflavone II	Flavonoid	55084-08-7	17443000	15275000	18665000	20309000	19435000	16792000	46169000	45690000	49037000	14801000	10863000	11930000	24453000	28077000	25945000	28916000	30583000	30111000
Hmmp007513	5	C19H18O8	5,7-Dihydroxy-6,3',4',5'-tetramethoxyflavone (Arteanoflavone)	Flavonoid	68710-17-8	13222000	12031000	14793000	13016000	12279000	11273000	38747000	37840000	39249000	11712000	8999400	10481000	19679000	22913000	20815000	23412000	24074000	24861000
mws1179	5	C21H22O10	Naringenin-7-O-glucoside (Prunin)*	Dihydroflavone	529-55-5	44208	42341	42757	67169	96778	85664	247960	149400	295990	15060	17675	18278	28141	35785	42270	83493	88774	75503
pmb3023	5	C21H22O11	Eriodictyol-8-C-glucoside*	Dihydroflavone	1023271-51-3	14001	11408	12782	23832	44659	34487	91243	57825	119790	6286.7	6483.7	4782.6	22363	30228	26809	15392	18657	12471
HJAP056	5	C23H24O11	Dihydroxy-dimethoxyflavone-7-O-glucoside*	Flavonoid	-	37384	29646	36018	91392	79103	64939	449220	398820	593790	9399.7	9997.9	8586.7	106690	137290	98852	150610	172240	153970
pmp000172	5	C23H24O11	5,2'-Dihydroxy-7,8-dimethoxyflavone glycosides*	Flavonoid	-	19242	12598	13848	38717	28745	22988	219830	212930	294260	9051.9	4934.1	8100	54513	55000	51107	103170	117690	88599
HJN084	5	C24H24O14	Laricitrin-3-O-(6''-acetyl)glucoside	Flavonoid	-	9	9	9	7008.8	7676.9	9740.9	26547	6850.3	25082	6350.1	4893.6	4198.2	7504.5	13967	6362.4	4147.5	6346.2	5192.7
HJN079	5	C27H32O13	Pinocembrin-7-O-rutinoside*	Flavonoid	118985-31-2	9	9	9	4543.7	6217.7	4191.7	9280.4	7065.9	12067	9	9	9	2426.2	3512.5	2801.6	6607.3	4859.6	5021.3
HJN076	5	C27H32O13	Pinocembrin-7-O-neohesperidoside*	Flavonoid	13241-31-1	9	9	9	4902.3	5121	5432.2	9652.2	6961.1	14745	9	9	9	2708.8	4112.3	2819.7	5173.2	5439.5	4876.9
Lmsp004749	5	C29H34O17	Syringetin-3-O-rutinoside	Flavonoid	-	125250	147590	137200	1145200	933220	895880	2727600	1856100	2432800	322130	280230	251410	817540	909340	753120	1146900	1136300	1214200
Lmqn001795	6	C16H12O4	5-Hydroxy-7-methoxyflavone	Flavonoid	-	58933	74506	77320	22995	30997	24620	138590	131460	285600	46404	52262	38741	83165	149100	127300	320420	283610	334120
Cmsp004086	6	C16H14O6	Dihydrokaempferide	Flavonols	137225-59-3	11935	27871	20905	19952	29169	15542	66896	37625	53235	15522	8626.6	11822	46332	64404	43921	100290	59191	49330
Xmgp006913	6	C20H20O5	2,4,2',4'-tetrahydroxy-3'-prenylchalcone	Chalcones	-	568210	637630	705990	1245300	1314200	1465000	2217200	1841800	2711900	299310	228830	256710	783940	1186000	784730	3049400	3116800	3122900
mws0091	6	C21H20O12	Quercetin-3-O-glucoside (Isoquercitrin)*	Flavonols	482-35-9	2661100	2788700	2504000	2409600	2451100	2168400	9233200	3961900	8024300	1916400	1474100	1264200	3669500	3518300	4134100	7805700	8314300	7822200
mws0856	6	C21H20O12	Quercetin-4'-O-glucoside (Spiraeoside)*	Flavonols	20229-56-5	2738500	3347000	2651200	2944500	3373400	2599700	8672400	4671400	8964700	1707800	1608500	1389300	3312300	3486100	3941600	7780000	7825900	6561900
mws1329	6	C21H20O12	Quercetin-7-O-glucoside*	Flavonols	491-50-9	2650600	2662400	2685800	2276700	3094400	2531800	7963700	3690100	7069000	1545100	1368800	1178700	3262600	3298000	3206600	6604500	7124700	7604200
pme1598	6	C22H24O11	Hesperetin-5-O-glucoside*	Dihydroflavonol	69651-80-5	2990700	2820500	2577100	2567000	2620500	2409700	8673300	3382300	8114800	1592000	1459600	1204800	3441700	3914600	3916600	7042800	7440100	7225900
Xmsn002700	6	C21H22O12	Taxifolin-3'-O-glucoside	Flavonoid	31106-05-5	75367	61272	61870	66036	81307	78728	189350	89205	213980	36630	36862	22698	84639	120450	93090	170070	172150	181920
Lmjp002906	6	C22H22O12	Rhamnetin-3-O-Glucoside*	Flavonols	27875-34-9	3044100	2199900	2352900	3041600	3402800	3888400	4339000	3361000	4121700	607950	463680	502600	2252200	3305100	2861700	3712000	4266100	3978200
Hmgp002036	6	C22H22O12	Nepetin-7-O-glucoside*	Flavonoid	569-90-4	2832300	2180400	2410500	2705800	3123800	3729700	4090500	2775100	3924700	643110	578210	514540	2031300	3529800	2822600	4058000	3442900	3354700
pma0791	6	C24H24O13	Naringenin-7-O-(6''-malonyl)glucoside	Flavanols	-	30458	26684	34018	81790	107110	114490	171040	104040	198600	28860	19181	20167	72931	120670	115250	159410	173180	155520
pmp001106	6	C27H30O15	Vitexin-2''-O-glucoside	Flavonoid carbonoside	61360-94-9	72627	50263	87934	538160	815130	730910	599600	740670	718640	73952	62152	55417	567800	670030	600360	961640	1034100	945570
pme1665	6	C27H30O15	Isovitexin-7-O-glucoside(Saponarin)	Flavonoid carbonoside	20310-89-8	1901.3	2219.6	9	23688	32401	27258	29229	34474	30460	2572	2516.6	2377.8	15671	20322	20332	40762	41853	37873
mws1073	6	C27H30O15	Apigenin-6,8-di-C-glucoside (Vicenin-2)	Flavonoid	23666-13-9	375020	281370	431150	2785100	4271600	3877800	3031400	3579800	3969000	429580	334140	298860	3108300	3824900	3297100	5761600	5774300	5526900
pmb0624	6	C27H30O16	Isoorientin-7-O-glucoside	Flavonoid carbonoside	-	9723.5	14444	13573	52055	61515	69749	57928	31586	53374	3680.7	3708.7	2617.9	35969	48507	37737	75337	88435	73520
pmb0587	6	C28H30O17	Chrysoeriol-7-O-(2''-O-glucuronyl)glucoside	Flavonoid	-	5857.6	5854.4	6959	13292	9223.6	7449.4	12992	14582	17338	9	9	3940.2	9	9	4460.5	13955	12177	12434
Cmxp005429	7	C15H12O6	Okanin	Chalcones	484-76-4	3319100	2679300	3481400	7918400	9097800	8934500	9614300	12070000	12581000	1237500	1099000	1235400	2064400	1985100	1741600	1490900	1497400	1552800
Zmpn002440	7	C15H12O6	3,4,2',4',6'-Pentahydroxychalcone	Chalcones	14917-41-0	7956200	6338000	9144100	21099000	23670000	23682000	28158000	31834000	37481000	3141000	2565100	2860600	5055300	5317500	4610400	5303200	5065800	4877400
mws0064	7	C15H12O6	Eriodictyol (5,7,3',4'-Tetrahydroxyflavanone)	Dihydroflavone	552-58-9	6853400	5790000	8138900	18267000	20615000	20401000	25131000	27519000	32174000	2868200	2300100	2588100	4421000	4656600	4331100	4541400	4424800	4331200
mws0058	7	C16H12O6	Diosmetin (5,7,3'-Trihydroxy-4'-methoxyflavone)	Flavonoid	520-34-3	790050	563030	910640	1798300	2069400	1965700	1325900	1268800	1670900	295310	213140	257530	328630	383120	348710	418270	447300	402050
pmf0567	7	C16H12O6	Tectorigenin	Isoflavones	548-77-6	1079800	778220	1244900	2438200	2979200	2795400	1952900	1744400	2294900	430470	327120	405880	526970	589790	518900	648310	706840	629570
Zmhn003257	7	C16H12O6	5,7,2'-Trhiyroxy-8-methoxyflavone	Flavonoid	-	760550	549850	892260	1773200	2132400	1808300	1351100	1226700	1684900	278720	199750	262640	332760	349880	335950	391880	454170	391230
pmp001127	7	C16H12O6	Chrysoeriol	Flavonoid	491-71-4	180640	130090	242430	387700	554500	538460	490220	374290	621340	67851	38574	40668	111650	160360	120770	112040	140510	114740
pmp000548	7	C16H12O6	Pratensein	Isoflavones	2284-31-3	600890	445870	695140	1343800	1508000	1466100	1100300	946440	1253400	229270	148520	195010	281730	336870	291830	358570	386190	349850
pmp000001	7	C16H12O6	Hispidulin (5,7,4'-Trihydroxy-6-methoxyflavone)	Flavonoid	1447-88-7	606360	432610	708690	1349100	1516200	1450800	1122700	954510	1290500	237760	153430	201880	278510	345530	303120	364260	381180	344850
Lmjp004941	7	C16H12O6	Rhamnocitrin (7-Methylkaempferol)	Flavonoid	569-92-6	578520	441130	734280	1337200	1556700	1460300	1108500	967160	1293400	233180	154090	198270	271130	338950	311640	363490	400350	354520
Zmhp003514	7	C16H12O6	6,7,8-Tetrahydroxy-5-methoxyflavone	Flavonoid	-	624630	460580	733830	1401800	1557200	1560500	1155900	992520	1325200	228270	162350	216880	303290	354040	313450	376790	412640	364690
Zmpn004713	7	C15H10O7	Isoetin (5,7,2',4',5'-Pentahydroxyflavone)	Flavonoid	1621-84-7	6512.7	4335.5	7242.8	34178	36894	34288	44642	23675	56175	4291.8	6711.4	4677.3	5135.9	4853.7	6492.7	6142.4	5633.9	5372.3
pmp000107	7	C18H16O6	Monohydroxy-trimethoxyflavone	Flavonoid	-	5665.5	6004.2	6630.8	15367	14396	9487.5	10089	12680	19063	9	9	9	9	9	9	9	9	9
Zmlp005013	7	C16H10O8	3,3'-O-Dimethylellagic Acid	Tannin	2239-88-5	12465	10975	10182	21494	19276	23249	21991	21947	27049	4590.1	4463	1850.3	8528.4	11765	8261.2	12388	18817	17203
Hmhp005160	7	C17H14O7	Rehderianin I	Flavonoid	90965-30-3	1323100	1093100	1446800	2433800	2634800	2322200	2322500	2320100	2534800	334400	257610	316410	614850	680270	634620	696520	701080	681990
Lmyp006951	7	C17H14O7	5,8,4'-Trihydroxy-6,7-dimethoxyflavone*	Flavonoid	98755-25-0	737500	623290	832150	1482600	1482100	1418400	1460100	1397400	1606200	198340	150190	181040	345960	434930	379860	404650	417550	402220
pmp000004	7	C17H14O7	4',5,7-Trihydroxy-3',6-dimethoxyflavone (Jaceosidin)*	Flavonoid	18085-97-7	1328400	1013400	1408700	2302800	2400400	2314900	2142100	2103600	2561400	342360	239070	285640	594680	638120	602300	662070	687620	627620
Lmjn005592	7	C18H16O7	Cirsilineol (4',5-Dihydroxy-3',6,7-trimethoxyflavone)	Flavonoid	41365-32-6	6354900	4864800	6252400	10961000	12757000	11174000	12582000	11712000	14152000	1833400	1471700	1590800	4230100	4724900	4565900	4873100	4869600	4820200
pmp000786	7	C18H16O7	Eupatorin (5,3'-Dihydroxy-6,7,4'-trimethoxyflavone)*	Flavonoid	855-96-9	2167600	1725800	2264500	3702200	4087900	3672900	4281700	3653900	4164000	702900	505400	602470	1546800	1673800	1444800	1612300	1727500	1694600
pmp000006	7	C18H16O7	Eupatilin (5,7-Dihydroxy-3',4',6-Trimethoxyflavone)*	Flavonoid	22368-21-4	2040400	1636700	2169500	3542500	3979700	3555900	4047000	3183500	3930900	691720	482450	550310	1380600	1524500	1489400	1563800	1513100	1541000
pmp000009	7	C18H16O8	Centaureidin (5,7,3'-Trihydroxy-3,6,4'-Trimethoxyflavone)	Flavonoid	17313-52-9	50421	36245	57922	101230	91346	71739	94264	85360	106800	9394.1	8228.9	7185.2	33313	35145	32604	52829	53368	51323
pmp000788	7	C18H16O8	Chrysosplenol D*	Flavonols	14965-20-9	2662600	2055300	3337400	5890300	5195000	4204900	5576500	5675900	6844100	399800	282020	294620	1663500	1736000	1753200	2309500	2280700	2447000
pmp001169	7	C18H16O8	Irigenin	Isoflavones	548-76-5	13914	9414.4	13418	25000	23380	19158	27665	25631	33543	1788.5	2167.9	773	8491.7	10217	8352	11945	11203	10438
Lmxn007456	7	C18H16O8	Acerosin*	Flavonoid	15835-74-2	449360	335520	512230	979940	856690	634570	860170	1142100	1255900	58454	42305	47915	253480	226850	248640	334340	356720	407780
Lmjp004839	7	C18H16O8	Arcapillin (2',4',5-trihydroxy-5',6,7-trimethoxyflavone)	Flavonoid	83162-82-7	578670	437470	642450	1070400	1025300	792830	1125000	1078800	1345700	91635	63368	71415	376030	382150	385190	543210	521020	555310
pmb0681	7	C20H18O9	Apigenin-8-C-Arabinoside	Flavonoid	-	28746	10132	36707	242620	440020	241190	133050	216030	151000	9	9	9	3739.5	9	4196.1	9138.5	8660.4	9
HJN086	7	C21H22O11	Eriodictyol-3'-O-glucoside*	Dihydroflavone	-	23028	23737	24554	97235	136640	95129	98766	74974	115080	12756	14150	14441	12003	11171	8786.2	14283	14403	18830
Lmmn004625	7	C21H22O11	Dihydrokaempferol-7-O-glucoside*	Flavonols	-	68110	61285	56040	142330	207120	166110	257760	139310	275800	32804	23148	22410	42548	61904	45768	64535	62751	57586
Lmzp002365	7	C22H24O11	Hesperetin-7-O-glucoside*	Flavonoid	31712-49-9	882060	579670	695180	1536400	2130900	1736800	1823100	1235300	2029000	157500	166800	157870	706790	996790	830390	864560	1078300	806770
Lmhp206353	7	C23H24O12	Tricin-4'-O-glucoside*	Flavonoid	-	3262800	3799100	3423200	6904000	8274400	9020600	7991600	7517800	8879000	514170	345310	382620	605720	809000	710640	810690	851960	622470
pmb0736	7	C23H24O12	Tricin-7-O-Glucoside*	Flavonoid	32769-01-0	2990900	3886100	3586500	7387500	7807700	8940300	7708700	6947700	8962800	473920	343590	406690	638010	855450	743320	789480	773840	716980
Lmgp004829	7	C23H24O12	5,7,4'-Trihydroxy-6,8-dimethoxyisoflavone-7-O-galactoside	Isoflavones	-	3087000	3885500	4208700	7801500	7786600	9115700	7987300	6688100	8966700	464240	333440	437700	610710	845820	700810	799640	839880	691930
pmp001164	7	C23H24O12	Iristectorin B	Isoflavones	94396-09-5	830650	730470	958190	1530600	1654600	1784900	2329700	1671700	2166500	107290	83249	91345	159200	174700	148930	189210	197080	159060
Hmgp002238	7	C23H24O12	Jaceosidin-7-O-Glucoside	Flavonoid	25474-11-7	3491300	3877500	3428100	7478600	7717400	9085800	8378900	7093500	8695800	483210	324400	442230	625190	833210	747690	829580	867140	693230
Li512111	7	C24H24O13	Isorhamnetin-3-O-(6''-acetylglucoside)	Flavonols	-	83593	59968	60435	626330	710110	451050	420350	340920	622950	22727	23921	27507	9	9	9	50845	65443	69334
pma0795	7	C24H22O15	Tricetin-5-O-(6''-malonyl)glucoside	Flavonoid	-	117580	136430	152940	1030900	1254300	1353000	1543700	767910	1970600	21163	21245	21043	110450	106500	114890	145880	134760	140260
mws1660	7	C26H28O14	Schaftoside	Flavonoid carbonoside	51938-32-0	32086	16751	38639	111170	127120	96668	116210	123120	119500	9	3641.8	9	4733.3	5619.6	4844.4	20481	8875	6676.3
Zmjp003463	7	C26H28O14	"Vitexin-2""-O-xyloside"	Flavonoid	-	876960	355150	829050	3037500	4579800	3740700	3911200	4604300	4110100	9682	92796	6794.3	133000	103590	98194	422130	233150	223880
Hmcp001858	7	C26H28O14	Kaempferol-3-O-arabinoside-7-O-rhamnoside	Flavonols	-	9550.3	13640	15568	19443	23802	14498	16434	20637	20281	9	9	9	9	9	9	9	9	9
Lmtp002474	7	C26H28O14	Apigenin-6-C-(2''-glucosyl)arabinoside*	Flavonoid carbonoside	-	6417300	2682100	6048100	18329000	22244000	19635000	18354000	23247000	19592000	79573	634660	50710	996810	746590	741350	2888700	1614800	1668600
Lmtp002642	7	C26H28O14	Apigenin-8-C-(2''-glucosyl)arabinoside*	Flavonoid carbonoside	-	2735500	1164800	2491600	9269500	14068000	10663000	11710000	13414000	12164000	26122	284160	15811	439170	348760	294120	1166400	652830	731860
pmp000411	7	C26H28O14	Genistein-8-C-apiosyl(1→6)glucoside	Isoflavones	-	814010	321180	747110	2209500	3392800	2747600	3007600	3232300	2948600	8689.9	82400	5684.8	122280	102250	95406	342110	169520	198380
Zmxp005470	7	C26H26O15	Tricin-7-O-(6''-O-malonyl)glucoside	Flavonoid	-	946080	324650	756770	2201000	2400400	2366800	1741100	1500000	2027300	130640	92049	120300	179480	229530	205230	148620	138670	125890
pmp001111	7	C27H30O14	Violanthin	Flavonoid carbonoside	40581-17-7	11217	14216	14020	49599	82763	62203	75079	130180	93732	9	9	9	3661.2	9	9	9108.2	5801.1	9
Hmmn004152	7	C27H32O15	Neoeriocitrin	Flavonoid	13241-32-2	11757	7238.4	6259.9	67609	89355	94684	91387	93137	118030	9	9	9	9	3893.2	2678.9	9	2366.7	3754.2
mws1519	7	C27H32O15	Eriodictyol-7-O-Rutinoside (Eriocitrin)	Dihydroflavone	13463-28-0	269090	178340	189570	1820300	2570500	2286900	2097100	2318900	3784400	13346	15211	15804	61052	71572	68334	100670	109350	103410
Cmxn006627	8	C15H10O6	Maritimetin	Sinensetin	576-02-3	7881.8	6266.7	7357.2	10324	8224.1	6325.2	15414	17569	17275	3703.6	3674.6	4742.2	19977	25362	14792	21577	21967	19727
Cmsp008121	8	C16H14O5	7-O-Methylnaringenin	Flavonoid	-	10167	12074	8745.4	18346	20092	26384	45412	21232	32222	11414	8071.3	7140.8	29919	39773	31894	20655	24264	26424
pme1662	8	C16H14O5	5,4'-Dihydroxy-7-methoxyflavanone (Sakuranetin)	Flavonoid	2957-21-3	15875	11616	11476	33924	28972	32720	46056	27345	40382	11714	10868	7557.5	25188	44644	36374	24992	29274	29483
mws0066	8	C16H12O7	Isorhamnetin	Flavonols	480-19-3	58984	57674	73101	113810	104410	124930	208720	250440	247530	73898	54483	66401	233520	240960	193810	203010	181900	189200
mws2627	8	C16H12O7	Tamarixetin (3,3',5,7-Tetrahydroxy-4'-Methoxyflavone)	Flavonoid	603-61-2	10468	8750.3	11443	13971	14910	13299	19344	18891	26905	16417	10950	10029	42904	47417	34681	32767	29504	29275
Lmdp003509	8	C20H18O11	Quercetin-3-O-xyloside (Reynoutrin)	Flavonols	549-32-6	87897	104180	90698	253870	254470	204370	896130	390210	1026000	88779	78412	79937	1008800	1530700	1285000	1343400	1625400	1313800
mws2186	8	C20H18O11	Avicularin(Quercetin-3-O-α-L-arabinofuranoside)	Flavonols	572-30-5	65719	88763	70598	203550	193520	153470	756430	367670	762150	82772	76444	53121	909460	1315200	1003100	1201800	1256500	1193700
pmp000575	8	C22H22O10	Acacetin-7-O-glucoside (Tilianin)*	Flavonoid	4291-60-5	5593.8	6074.6	3477.3	9	9	3647	102030	70268	107650	10845	13865	10219	82882	101580	98332	89528	116240	103310
pmp000573	8	C22H22O10	Acacetin-7-O-galactoside*	Flavonoid	-	9	4692.4	3828.2	5737.9	4579.8	3971.9	129980	87999	136800	19146	17282	16179	110440	138830	112620	142440	153470	128010
pmp000583	8	C22H20O12	Diosmetin-7-O-glucuronide	Flavonoid	35110-20-4	3116300	2983200	4434200	4617000	6314800	4925500	6741000	7442000	8005500	2022900	1759700	1761500	8679200	9910700	7735300	5736800	6709600	5766900
Lmjp003044	8	C22H22O12	Isorhamnetin-3-O-Glucoside*	Flavonols	5041-82-7	2761800	3654300	2900900	6319500	6047500	6603300	6734800	4284500	8072200	1389900	1110000	1124900	8309200	11792000	8337800	4953800	5509300	4618400
Hmcp002207	8	C22H22O12	Isorhamnetin-7-O-glucoside (Brassicin)*	Flavonols	6743-96-0	2516700	3408800	2858200	6241900	5925900	6070800	7716200	4197200	8380000	1468400	1075000	1134800	8174600	11592000	8799300	5132800	5460400	4760200
Hmgp002148	8	C22H22O12	Nepetin-7-O-alloside*	Flavonoid	-	2685500	3539600	2815200	5923200	6373900	5953600	7190800	4362300	8455500	1419500	1050800	1187700	8629200	11453000	8796100	5030800	5681800	4887900
HJAP005	8	C22H22O13	Laricitrin-3-O-glucoside	Flavonoid	39986-90-8	187840	344030	313710	882880	922290	809480	5576500	2096600	6454500	224400	145860	163550	3087900	4004900	3664000	2418900	2685800	2284100
Lmjp003231	8	C22H22O13	Patuletin-3-O-glucoside	Flavonoid	-	176180	414530	252000	893670	909660	775870	5280700	1959100	5618500	190190	125640	153400	2818700	4471500	3220900	2022000	2381800	2010100
Hmcp002399	8	C23H24O13	Limocitrin-3-O-glucoside*	Flavonoid	-	844220	715110	844700	1100600	1170000	1287700	1235900	1055700	1396100	620000	566430	513360	1660600	2498100	1956800	1532500	1529000	1436300
HJAP006	8	C23H24O13	Syringetin-7-O-glucoside	Flavonoid	-	764630	626060	825190	1011600	1004400	1211000	1229000	985240	1317600	617630	577930	512860	1678500	2563200	2072500	1441600	1348500	1613600
mws0059	8	C27H30O16	Quercetin-3-O-rutinoside (Rutin)*	Flavonols	153-18-4	670350	734610	458970	1760600	1987300	1687300	12968000	5959300	11662000	2120300	2011500	1574800	11242000	13835000	11789000	11477000	11990000	12974000
Lmsp004166	8	C27H30O16	Quercetin-3-O-glucoside-7-O-rhamnoside*	Flavonols	-	1546900	2113200	1465900	4915800	5023100	4285100	31254000	16472000	29560000	6319300	5735900	4832200	32199000	38468000	34310000	28170000	31250000	27908000
pmb0711	8	C27H30O16	Quercetin-7-O-rutinoside*	Flavonols	147714-62-3	1792000	2083800	1260400	4481200	5014100	4580500	31203000	16494000	32063000	5855300	5822400	4917900	32337000	36138000	35743000	28644000	30325000	26070000
Lmjp002461	8	C27H30O16	Quercetin-3-O-neohesperidoside*	Flavonols	117611-67-3	1783500	1821100	1184400	5000000	4750500	3939600	25935000	14863000	27264000	5846800	5248400	4756500	28609000	35181000	30869000	26863000	28067000	26301000
pmn001583	8	C27H30O16	Quercetin-3-O-robinobioside*	Flavonols	52525-35-6	703610	796090	532110	2329700	2167900	1999900	15276000	7144400	13149000	2590800	2041800	1780200	11641000	18522000	14763000	14720000	13862000	12688000
Lmmp003091	8	C27H30O16	Quercetin-3-O-(4''-O-glucosyl)rhamnoside*	Flavonols	59262-54-3	1753400	2083300	1362800	5340400	5332600	4732200	31125000	15148000	31494000	5939100	5935700	4977300	31589000	37921000	34524000	30494000	31588000	27633000
Hmjp002999	8	C28H32O16	Isorhamnetin-3-O-rutinoside (Narcissin)*	Flavonoid	604-80-8	494600	576690	439050	1148800	1256600	1191400	5672700	2787200	5769100	671340	540750	520240	5573600	7651000	5790600	4382700	4503200	3947300
HJAP120	8	C28H32O16	Rhamnetin-3-O-Rutinoside*	Flavonoid	-	484380	555200	530710	1200300	1175700	992740	4678600	2776400	5535100	655960	581580	528070	5379400	6688500	5651800	4238300	4187600	3876500
Lmmp002463	8	C28H32O16	Sexangularetin-3-O-glucoside-7-O-rhamnoside	Flavonols	-	484550	578340	444780	1144500	1289400	1102000	5608200	2708700	5574300	629800	595560	463790	5361100	7637900	6034000	4557900	4685300	3749000
Lmsp004721	8	C28H32O16	Tamarixetin-3-O-glucoside-7-O-rhamnoside	Flavonoid	-	521580	612620	460340	1271900	1204600	1200500	5471800	3236000	6109900	671430	541170	526080	5770500	7433800	6511000	4441600	4556700	3991300
Lmhp003217	8	C28H32O16	2'-Hydoxy,5-methoxyGenistein-O-rhamnosyl-glucoside	Isoflavones	-	459920	538980	469680	1172400	1277100	1118900	5319900	2881500	5609900	611930	527720	571300	5561700	7239100	6077600	4034400	4273900	3764600
Zmap007870	9	C16H14O6	Blumeatin	Flavonoid	118024-26-3	567210	480270	563650	1149100	1157100	981630	20165	18080	21787	9	9	2013.3	11985	9	9	9	4376.4	9
Cmsp007228	9	C16H14O6	7-O-Methyleriodictyol	Flavanols	51857-11-5	566150	446880	544240	1167500	1173900	1014100	20743	19059	21619	9	9	9	13521	9	9	9	4826.6	4436.8
Lmzp004885	9	C17H14O7	Tricin (5,7,4'-Trihydroxy-3',5'-dimethoxyflavone)	Flavonoid	520-32-1	1826300	596600	1350400	1703600	1426200	891130	1093700	1417900	1102900	212390	167490	248000	318240	281840	275500	847510	870810	921680
Lmjp004404	9	C16H12O8	Quercetagetin-3-Methyl Ether*	Flavonoid	64190-88-1	292280	213050	344470	496850	447830	359990	218660	233830	238340	91093	65519	87057	236210	231880	239660	136710	109440	115540
Lmpn007255	9	C16H12O8	Patuletin (Quercetagetin-6-methyl ether)	Flavonols	519-96-0	364360	299260	519510	794720	867960	642090	397660	470920	500520	150010	108080	137150	329070	359550	305970	258520	177140	194130
Lmjn004351	9	C16H12O8	Quercetagetin-4'-Methyl Ether*	Flavonoid	-	109080	83490	146320	236000	248050	180370	128230	142160	147650	42556	29193	36307	93609	90585	86879	71756	54038	51163
pmb2928	9	C13H16O10	Gallic acid-4-O-glucoside*	Tannin	84274-52-2	192930	267350	361300	304720	308550	378220	32311	23051	37493	29697	29267	28578	105560	179280	149610	7471	5391.9	6509.9
Lmlp005236	9	C21H22O11	Dihydrokaempferol-3-O-glucoside*	Dihydroflavonol	1049-08-8	1038600	1125600	1173200	855720	905960	955190	394350	408790	477750	297340	250240	221880	226870	385560	324380	351980	387830	327590
mws1454	9	C23H26O11	Persicoside	Dihydroflavone	28978-03-2	570640	560960	637070	611260	734130	686230	220570	263760	325640	265060	159520	173110	441380	588010	457890	126990	141210	110370
pmp000589	9	C24H22O15	Quercetin-7-O-(6''-malonyl)glucoside*	Flavonols	-	529140	529430	671480	698750	647440	929930	340910	340080	472140	255400	220510	171020	9	9	9	165020	156430	158440
pmb2586	9	C30H26O13	Gallocatechin-(4α→8)-catechin	Flavanols	-	31969	18260	20941	27535	34112	27942	19791	21873	18155	5892.5	3799.6	5380	9821.3	10642	7246.8	16939	13380	13455
pmp000593	9	C27H30O15	Luteolin-7-O-rutinoside*	Flavonoid	3563-98-2	9109400	5820500	6388000	8621800	10830000	9996600	6955800	5228500	6372400	1508300	1148600	1147800	3677000	3955800	3210300	4240300	4524100	4195600
pmp001079	9	C27H30O15	Luteolin-7-O-neohesperidoside (Lonicerin)*	Flavonoid	25694-72-8	7800400	4946000	5097000	7199000	9375000	7467500	6665700	4319000	5250800	1269100	1093500	1083600	2824600	3293300	2912300	3567700	3882200	3526700
Lmnp002413	9	C27H30O15	Luteolin-6-C-rhamnoside-7-O-glucoside*	Flavonoid carbonoside	-	7263600	4866500	4935200	7307200	9005600	7574300	6549000	4490800	5217100	1274700	1077300	981330	2947400	3158800	2677600	3520500	3993900	3563800
pme1605	9	C27H30O15	Kaempferol-3-O-robinobioside(Biorobin)*	Flavonols	17297-56-2	7412800	5302500	5050300	6987700	8317700	7277600	4980700	3711500	4296700	1269300	995650	1031300	1634100	2200400	2313200	3394200	3325100	2950400
Lmzn001572	9	C27H26O18	Scutellarein-7-O-glucuronosyl-(1->2)-glucuronide	Flavonoid	150641-65-9	182380	212920	187890	529490	719070	510290	96867	73079	168770	141330	113790	112270	75365	58188	26213	22950	34478	25607
mws0063	10	C15H10O5	Genistein	Isoflavones	446-72-0	16856	13329	18716	30402	33421	22746	20150	19989	27766	20914	13473	16161	23801	23230	17825	51367	59725	51623
pmp000571	10	C15H10O5	Apigenin	Flavonoid	520-36-5	431430	327580	464590	831290	857690	637200	543600	590900	690790	642170	402400	496990	710900	856520	557730	1514100	1929900	1559100
pmp000344	10	C15H10O5	3',4',7-Trihydroxyflavone	Flavonoid	2150-11-0	22037	21138	31774	50649	52116	29225	31821	32696	31348	33703	23582	27166	35665	49463	40706	93176	110420	90635
Lmyn006227	10	C15H10O5	Galangin (3,5,7-Trihydroxyflavone)	Flavonoid	548-83-4	634630	508170	715640	1248900	1221700	990430	932620	956970	1028400	975470	627830	838440	1041500	1129500	810920	2544000	2881000	2300000
Lmmp004504	10	C15H10O6	2'-Hydroxygenistein	Isoflavones	1156-78-1	926860	883360	1007700	882860	868330	944640	1103100	1117500	1324500	1089700	695880	816090	1142700	1316800	1069700	2184400	2236500	2002600
Hmbp002730	10	C15H10O6	Isoscutellarein	Flavonoid	41440-05-5	950010	878160	909860	888330	868520	899950	1082700	1095400	1230700	1081800	636690	805940	1084700	1263200	977830	1999600	2337600	2029700
pmp000964	10	C15H10O6	Aureusidin	Sinensetin	38216-54-5	930560	868490	926950	844850	859660	967280	1031700	1076800	1147400	1100100	648750	780070	1084100	1229900	1005200	1979100	2175900	1976500
pme0088	10	C15H10O6	Luteolin (5,7,3',4'-Tetrahydroxyflavone)	Flavonoid	491-70-3	3046100	2898900	3113200	2867700	2719700	2889600	3844900	3600000	4355000	4030900	2579700	3058800	3641900	4096200	3186600	7838800	8422100	7670400
mws1002	10	C17H14O8	Syringetin	Flavonoid	4423-37-4	3151000	1884600	3755800	5659700	7575800	7672400	5339000	5206600	6055100	2908100	1526800	1989700	6828100	6761800	6945200	13849000	12800000	14526000
Lmgn002933	10	C18H18O7	5,7-Dihydroxy-2',3',4'-trimethoxydihydroisoflavone	Dihydroisoflavone	-	2666300	1628000	3187200	5541300	7069100	7311000	4513500	4681000	5257100	2502200	1276700	1717000	5703900	6061500	5716600	11598000	11218000	12160000
Lmjp005224	10	C18H16O8	4',5,7-Trihydroxy-3',3,6-Trimethoxyflavone (Jaceidin)*	Flavonoid	10173-01-0	5713400	4252200	5372300	4236600	4650900	4667800	5466300	4626100	5799300	5786100	3743700	5111500	9016100	9959500	9534700	11172000	11060000	10957000
pmb0580	10	C21H20O9	Chrysin-5-O-glucoside (Toringin)*	Flavonoid	1329-10-8	19730	17316	17463	41972	49914	41464	28250	20177	18765	11470	7633	13232	34868	47911	47737	79753	76897	63633
Lmyp005841	10	C21H20O9	Chrysin-7-O-glucoside*	Flavonoid	31025-53-3	19210	20458	19931	41199	55579	44122	23332	17744	26205	18062	14947	17909	34149	56579	47424	75191	83300	71239
pmn001697	10	C21H18O11	Apigenin-7-O-glucuronide	Flavonoid	29741-09-1	210220	187030	302660	742230	683820	564670	604820	666850	940190	777180	853540	814440	1633700	1563400	1271500	2679600	3250000	2543600
pmp000579	10	C22H22O11	Diosmetin-7-O-galactoside	Flavonoid	-	21884000	13789000	15985000	14741000	24333000	15994000	13870000	17414000	12634000	2556300	1902400	1664800	14333000	24176000	18457000	22337000	26045000	23987000
HJAP011	10	C22H22O11	Chrysoeriol-8-C-glucoside (Scoparin)	Flavonoid	301-16-6	47067	46897	45299	132740	190210	152390	178380	213570	237010	182120	146910	183540	898260	1018100	872830	972660	1050000	898350
Lmjp003655	10	C22H22O11	6-C-MethylKaempferol-3-glucoside	Flavonoid	-	21851000	12780000	15585000	13777000	23528000	14925000	12720000	15259000	11174000	2297400	1670200	1795100	13929000	21445000	18468000	23852000	27518000	22519000
pmp001163	10	C22H22O11	Tectoridin	Isoflavones	611-40-5	1309000	963360	989870	1445200	2033900	1467200	975610	1090600	1019900	296950	197590	178040	2816700	4544900	3411300	4058200	5209100	4733300
Hmgp002189	10	C22H22O11	Hispidulin-7-O-Glucoside	Flavonoid	17680-84-1	21582000	13832000	14678000	15027000	24095000	16142000	12798000	15973000	13403000	2395500	1705200	1761900	13107000	22318000	18373000	22183000	27816000	22272000
pmp000581	10	C23H22O11	Apigenin-7-O-(6''-acetyl)glucoside	Flavonoid	72741-92-5	13493	12233	13462	19003	15850	21138	5449.3	2863.6	4832.2	15651	12563	12349	23299	41489	30880	60331	69715	58147
pma0825	10	C24H22O12	Chrysin-7-O-(6''-malonyl)glucoside	Flavonoid	-	6786.5	8299.5	7823.2	28275	28322	34025	13592	9197.5	13315	9049	7678.4	9119.2	37740	65639	59080	47366	51570	46014
Hmcp002187	10	C23H24O13	Limocitrin-3-O-galactoside*	Flavonoid	-	117040	76454	90776	1417100	1435400	1855900	335620	278060	294020	1188000	1168000	930290	2997900	3546200	3125000	3978100	3956800	3687100
Zmjp004852	10	C23H24O13	5,6,3′,4′-Tetrahydroxy-3,7-dimethoxyflavone-6-O-glucoside	Flavonoid	-	111820	95857	9	1447200	1529200	1950300	321090	202670	255030	955860	1141300	945800	3392000	3580600	3019900	3951800	4553700	3645700
pmp000194	10	C24H22O13	6''-O-Malonylgenistin	Isoflavones	51011-05-3	453250	383240	512380	908250	1044700	942000	141510	94785	178050	488730	373760	323810	1756700	2592800	2427200	2803100	3450700	2823600
pmp000585	10	C24H22O13	Apigenin-7-O-(6''-malonyl)glucoside	Flavonoid	86546-87-4	24531	19608	28558	46178	61683	55968	11169	5511.1	11270	33748	23137	22121	95089	159650	131570	181240	191650	159300
pmp001165	10	C24H26O13	Iridin	Isoflavones	491-74-7	9	9	9	7605.6	7208.5	7453.8	21650	11756	16075	7695.5	10162	6229.1	69037	79359	93276	139670	165860	154180
pmp000587	10	C24H22O14	Luteolin-7-O-(6''-malonyl)glucoside	Flavonoid	-	80877	91093	90693	67921	73872	70020	8254.8	4120.6	15000	48092	32200	30859	73457	90918	78428	95584	128680	111970
Lmsn002815	10	C27H30O15	Kaempferol-3-O-rutinoside(Nicotiflorin)	Flavonoid	17650-84-9	47676	41922	37745	66078	65855	59527	270950	206110	287890	64764	48797	49139	341630	420700	440840	612360	643550	618900
pmp000126	10	C27H30O16	Luteolin-6,8-di-C-glucoside	Flavonoid carbonoside	29428-58-8	8726.1	9744.7	11306	116670	210130	188080	46921	72494	57828	121340	93080	87977	1141000	1346200	1160700	1776100	1806600	1662300
Lmzn001664	10	C27H28O17	Kaempferol-3-O-glucuronide-7-O-glucoside	Flavonols	-	9	9	9	9	9	9	9	9	4111.9	9	9	950.24	18357	24766	19917	39042	39824	36248
pmp000127	10	C28H32O16	Chrysoeriol-6,8-di-C-glucoside	Flavonoid carbonoside	-	20150	21612	20120	136230	265520	207010	109080	143590	133950	160770	125520	128580	1268500	1567400	1432900	2268500	2358000	2144600
pmp001311	10	C27H30O17	6-Hydroxykaempferol-7,6-O-Diglucoside*	Flavonols	-	201800	276330	178540	449980	473780	409080	202290	100510	214730	58476	57535	49304	387920	672860	637100	743290	826070	774310
Hmcp001578	10	C28H32O17	Isorhamnetin-3,7-O-diglucoside*	Flavonols	6758-51-6	51998	47021	47056	74691	102490	77825	157100	70400	182020	19457	14424	12474	131970	191650	164740	250040	264010	232000
Lmsp003252	10	C28H32O17	Isorhamnetin-3-O-sophoroside*	Flavonols	-	73834	74164	69677	116490	177920	131960	212110	81710	219650	11685	9217.6	8770.8	216740	381240	336600	455050	488310	384840
pmn001518	11	C13H16O10	1-O-Galloyl-D-glucose*	Tannin	58511-73-2	184100	227430	253820	149460	166440	181110	24248	17689	27227	70038	85580	66837	89080	142500	115240	17174	12165	17526
mws0913	11	C21H20O11	Kaempferol-3-O-galactoside (Trifolin)*	Flavonols	23627-87-4	10357000	13539000	10802000	5002500	4157300	5758500	1371300	785430	1314700	2737300	3265900	2434700	1731900	1858700	1640800	3631400	5120300	3730800
pme2459	11	C21H20O11	Luteolin-7-O-glucoside (Cynaroside)	Flavonoid	5373-11-5	25997000	26827000	26293000	11051000	12109000	15609000	2735500	1870700	3970100	9558500	8219200	6389300	8645300	11691000	9141900	10728000	11771000	11704000
Hmdn001667	11	C20H16O13	Ellagic acid-4-O-glucoside	Tannin	-	709000	405360	455860	170230	182200	154790	134200	128140	137440	102220	84628	79478	208170	239240	259400	331700	444240	347860
mws0061	11	C21H20O12	Quercetin-3-O-galactoside (Hyperin)*	Flavonols	482-36-0	492190	295030	304220	136460	109740	129420	88585	91309	95991	72677	43416	66457	112310	172660	150090	239120	252080	243870
pmp001309	11	C21H20O12	6-Hydroxykaempferol-7-O-glucoside	Flavonols	-	2610200	1484000	1892300	726850	803240	782910	536690	434080	619230	345310	250280	252720	909660	1781100	1320400	1227600	1457200	1312200
HJN104	11	C21H22O13	Dihydromyricetin-3-O-glucoside	Dihydroflavonol	-	158800	135510	197280	38502	39337	29882	9	9	9	243500	138230	176730	75318	82040	75991	9	9	9
Lmtn002997	11	C22H22O13	Mearnsetin-3-O-glucoside	Flavonoid	-	361030	286440	446690	9	9	9	193890	149370	91309	90909	78941	72505	9	9	9	52874	55781	40851
pmp000588	11	C25H24O14	Diosmetin-7-O-(6''-malonyl)glucoside	Flavonoid	-	116690	110080	120400	87101	113870	102750	23851	18109	25677	15096	9814.9	11805	65775	87872	67109	88267	81851	77543
HJAP148	11	C26H28O15	Kaempferol-3-O-sambubioside	Flavonoid	27661-51-4	6673500	7271300	8140400	3630000	2496200	4131900	1719900	1187200	2510900	2419600	2281800	2301200	3673700	4504900	3109300	2514300	2831000	2341100
pmb0566	11	C26H28O15	Luteolin-7-O-glucoside-5-O-arabinoside	Flavonoid	-	12855	10618	20251	8200.8	6804.4	8488.8	9	9	9	7887.7	5549.1	4715.1	6174.8	11831	4081.4	4480.5	5045.2	4641.9
pme0309	12	C8H8O5	3-O-Methylgallic Acid	Tannin	3934-84-7	80863	65580	68705	84117	69771	93532	153000	155520	151880	25942	41969	49631	48834	70118	71465	9	9	9
Zmjp006969	12	C17H14O6	Pectolinarigenin	Flavonoid	520-12-7	7883900	7120000	13439000	15976000	12967000	11158000	32845000	27253000	37793000	43097	110130	18794	316440	37885	39407	324010	113520	51187
HJAP057	12	C17H14O6	Dihydroxy-dimethoxyflavone	Flavonoid	-	7590100	7050800	12980000	16255000	12561000	11034000	32826000	25647000	37741000	45475	111410	24395	322510	35292	38857	323850	118740	50705
Hmxp007521	12	C17H14O6	3’,4’-Dihydroxy-7,5’-dimethoxyflavone*	Flavonoid	-	5463000	5190600	8600800	12434000	9723100	8360800	25559000	22773000	30340000	121920	173600	85570	614210	453630	427500	1007100	904630	889450
pmp000784	12	C17H14O6	Cirsimaritin (4',5-dihydroxy-6,7-dimethoxyflavone)	Flavonoid	6601-62-3	190630	180610	314510	389930	318070	291710	953280	780940	1130100	2204	3785.3	1266.7	10071	3771.3	4038	14457	8670.6	8574.4
mws0038	12	C17H14O6	Kumatakenin	Flavonols	3301-49-3	2244700	1567300	2489900	6997500	8796200	7397500	14187000	15148000	17765000	164510	198510	139330	528030	488820	479920	562730	542750	493560
Lmqn004838	12	C15H8O8	3-O-Methylellagic acid	Tannin	-	5436500	3760300	5199400	6594000	5362200	4755400	6988500	7586500	10687000	103950	90651	42891	91688	52360	49305	127620	132160	105040
Lmsp011053	12	C18H18O6	7-Hydroxy-2',5,8-Trimethoxyflavanone	Dihydroflavone	-	1273600	865590	1189100	3055300	2738000	2476000	4394300	6397800	5952500	3130.2	32819	9	33126	9	3649.4	49336	11089	9
mws1474	12	C18H16O7	5,7-Dihydroxy-3',4',5'-trimethoxyflavone	Flavonoid	18103-42-9	7346600	6468000	9566700	20856000	17363000	15606000	25568000	27685000	26562000	1025700	962580	890740	2511100	2323900	2237700	2621000	2675700	2432500
HJAP058	12	C19H20O6	5,6,7,4'-Tetramethoxyflavanone	Flavonoid	2569-77-9	1406400	1256100	1914300	4415200	3814800	3359000	5987100	6108500	6036100	209470	193100	164670	501430	458300	429110	492280	499410	437890
Lmjp005033	12	C17H14O8	Quercetagetin-3,4'-Dimethyl Ether	Flavonoid	-	9233.4	5304.7	11056	27570	15229	12735	26304	43359	43438	9	9	9	9	9	9	9	9	9
Lmjp005690	12	C19H18O8	Chrysosplenetin (Quercetagetin-3,6,7,3'-tetramethyl ether)	Flavonoid	603-56-5	19433	18869	31706	96846	72467	50694	99822	114300	121410	9	9	9	9	9	9	9	9	9
mws1434	12	C21H20O10	Apigenin-6-C-glucoside (Isovitexin)*	Flavonoid carbonoside	29702-25-8	2757900	3313900	3520300	4672100	4718600	5156000	7786300	9721900	6738600	223970	266680	208170	732420	626840	585430	1019300	872830	797660
mws0048	12	C21H20O10	Apigenin-8-C-Glucoside (Vitexin)*	Flavonoid carbonoside	3681-93-4	2646000	3260600	3370200	4222900	5031900	4470200	7049300	8583600	6998600	205700	264600	201800	669320	661000	605220	941990	782490	789300
Lmfn003760	12	C21H18O13	Quercetin-4′-O-glucuronide*	Flavonols	201463-36-7	677790	662010	816190	779930	869410	623130	655190	1508400	1459700	237950	164110	227850	555940	544710	427590	349340	351790	284350
Lmqp003647	12	C21H18O13	Herbacetin-3-O-glucuronide	Flavonols	-	391260	412130	405840	340110	372750	264700	330880	656350	502890	149390	117480	149730	405900	284880	208490	144730	143420	157960
pmb3045	12	C23H22O13	Tricin-7-O-Glucuronide	Flavonoid	-	445770	259320	443140	361480	407040	255520	553110	747400	599300	181120	158470	213120	75985	67931	68334	134680	147120	132880
pmp000237	12	C26H26O15	Apigenin-6-C-(2''-glucuronyl)xyloside	Flavonoid carbonoside	-	155390	115030	167340	271980	235130	244310	243510	265770	432240	9	9	9	9	9	9	9	9	9
Lmsp004247	12	C27H30O15	Isorhamnetin-3-O-arabinoside-7-O-rhamnoside	Flavonols	-	288950	270910	286300	368200	494640	311340	502650	549700	556080	9	3967.9	9	6738.9	9	2543	9	9	9
mws1661	12	C28H32O15	Diosmetin-7-O-rutinoside (Diosmin)*	Flavonoid	520-27-4	23063000	12371000	18282000	15604000	28353000	12894000	39841000	48394000	38799000	82379	1071600	98058	541240	267140	218870	1072000	663900	516590
pmp001080	12	C28H32O15	Diosmetin-7-O-Neohesperidoside (Neodiosmin)*	Flavonoid	38665-01-9	11279000	6317400	9847900	9065800	14300000	7983000	23198000	29661000	22083000	44295	589700	29691	228550	130470	82118	672010	350640	248560
Hmgp002121	12	C31H28O13	Hispidulin-7-O-(6''-O-p-Coumaroyl)Glucoside	Flavonoid	-	13305000	7506900	9948100	10541000	15411000	9020600	25958000	32448000	22386000	49240	612560	54492	228010	113700	103510	748600	336630	277320
pmp001289	12	C28H28O18	Chrysoeriol-7-O-(2''-O-glucuronyl)glucuronide	Flavonoid	-	449560	536820	644790	728910	922020	727500	1153400	1774300	1523900	52774	104030	53431	42178	15315	6424.1	67261	15834	13884
pmb0716	12	C29H34O17	Tricin-4'-O-glucoside-7-O-glucoside*	Flavonoid	-	351970	470670	408850	655940	601720	649520	698650	658460	905730	62861	46215	66154	90471	88919	84420	91586	88735	81889
Zmxp004503	12	C29H34O17	Tricin-5,7-O-diglucoside*	Flavonoid	-	1108900	1470300	1317300	1980600	1896300	2034300	2892300	2047800	2654500	175530	145370	182070	256550	296320	223400	251610	265820	216910
Lmgp004539	12	C29H34O17	5,7,4'-Trihydroxy-6,8-dimethoxyisoflavone-7-O-galactoside-glucoside	Isoflavones	-	1407100	1370500	1277200	2245400	2028900	2192000	3032000	2397400	3050500	212130	169360	209740	263870	352230	251000	267410	276540	270640
pmb0475	12	C29H34O18	Gallic acid-4-O-(6'''-feruloyl)sophoroside	Tannin	-	186750	129580	202780	121760	134280	123590	254590	175970	238850	22594	13044	24794	17335	17840	19617	20578	30103	23664
Hmgp001916	12	C29H34O18	3,3',5,7-Tetrahydroxy-4',6-Dimethoxyflavone-7-O-Gentiobioside; (Laciniatin-7-O-Gentiobioside)	Flavonols	-	670640	468850	690200	574310	507660	519790	953330	640030	911610	65715	66206	76687	81825	81039	66812	115200	129820	101850

## Sheet: Table S3
Table S3 Detected metabolites using volatile widely targeted metabolome analyses of A. argyi and A. indica in different harvest periods
Index	Compounds	Exact mass(Da)	Formula	NIST_RI	Class	CAS	RT	RI	Match factor	kegg_map
XMW0126	Benzene, 1-methyl-3-(1-methylethyl)-	134.11	C10H14	1042	Aromatics	535-77-3	11.87	1028.17	88.24	--
NMW0043	Bicyclo[3.1.1]hept-2-en-6-one, 2,7,7-trimethyl-	150.104	C10H14O	1123	Terpenes	473-06-3	14.82	1125.47	87.76	--
NMW0231	Phenol, 2-methoxy-4-(2-propenyl)-, acetate	206.094	C12H14O3	1524	Ester	93-28-7	21.31	1354.96	85.93	--
KMW0259	.gamma.-Terpinene	136.125	C10H16	1074	Terpenes	99-85-4	12.83	1059.81	96.54	--
NMW0175	Phenol, 4-(1,1-dimethylpropyl)-	164.12	C11H16O	1400	Phenol	80-46-6	22.4	1395.45	61	--
NMW0071	L-.alpha.-Terpineol	154.136	C10H18O	1190	Terpenes	10482-56-1	17.01	1199.55	94.47	ko00902,ko01100,ko01110
NMW0025	Acetic acid, phenyl ester	136.052	C8H8O2	1067	Ester	122-79-2	17.08	1201.82	60.37	--
NMW0105	Phenol, 4-propyl-	136.089	C9H12O	1260	Phenol	645-56-7	16.98	1198.55	62.45	--
KMW0178	Bicyclo[3.1.0]hexane, 4-methylene-1-(1-methylethyl)-	136.125	C10H16	972	Terpenes	3387-41-5	10.18	971.89	97.52	--
KMW0218	Eucalyptol	154.136	C10H18O	1030	Terpenes	470-82-6	13.24	1073.04	81.22	ko00902,ko01110
KMW0257	Bicyclo[3.1.0]hexan-2-ol, 2-methyl-5-(1-methylethyl)-, (1.alpha.,2.beta.,5.alpha.)-	154.136	C10H18O	1073	Terpenes	15537-55-0	13.24	1073.04	94.51	ko00902,ko01100,ko01110
XMW0909	2,6,6-Trimethylbicyclo[3.2.0]hept-2-en-7-one	150.104	C10H14O	1108	Terpenes	4613-37-0	14.11	1101.47	91.48	--
XMW0248	2-Cyclohexen-1-one, 3-methyl-6-(1-methylethenyl)-, (S)-	150.104	C10H14O	1190	Terpenes	16750-82-6	19.05	1271.87	90.68	--
NMW0005	3-Cyclohexen-1-ol, 4-methyl-1-(1-methylethyl)-, (R)-	154.136	C10H18O	1182	Terpenes	20126-76-5	16.57	1184.71	93.64	--
XMW1435	Isobutyric acid, 2-pinen-10-yl ester	222.162	C14H22O2	1466	Ester	29021-37-2	19.52	1288.38	84.23	--
KMW0153	α-thujene	136.125	C10H16	938	Terpenes	2867-05-2	8.76	923.89	97.46	--
XMW0933	Bicyclo[3.1.1]hept-2-en-6-ol, 2,7,7-trimethyl-, acetate, [1S-(1.alpha.,5.alpha.,6.beta.)]-	194.131	C12H18O2	1239	Ester	50764-55-1	18.67	1258.26	84.01	--
XMW0956	2-Cyclohexen-1-ol, 2-methyl-5-(1-methylethenyl)-, acetate, cis-	194.131	C12H18O2	1362	Ester	1205-42-1	20.73	1333.2	86.7	--
XMW0192	(+)-4-Carene	136.125	C10H16	919	Terpenes	29050-33-7	13.63	1085.97	98.09	--
XMW0968	4,7,7-Trimethylbicyclo[4.1.0]hept-3-en-2-one	150.104	C10H14O	1314	Ketone	81800-50-2	23.04	1420.69	93.38	--
XMW1134	Pyrimidine, 4-butyl-3,4-dihydro-5-methyl-	152.131	C9H16N2	1316	Heterocyclic compound	1000115-50-2	17.11	1203.07	61.52	--
KMW0388	Carveol	152.12	C10H16O	1197	Terpenes	99-48-9	10.7	989.61	84.05	--
KMW0413	(-)-Carvone	150.104	C10H14O	1254	Terpenes	6485-40-1	16.77	1191.3	81.28	ko00902,ko00903,ko01110
KMW0489	1-Cyclohexene-1-carboxaldehyde, 4-(1-methylethenyl)-, (S)-	150.104	C10H14O	1319	Aldehyde	18031-40-8	19.23	1278.17	94.87	--
WMW0204	Bicyclo[3.1.0]hexan-3-ol, 4-methylene-1-(1-methylethyl)-, acetate	194.131	C12H18O2	1292	Ester	3536-54-7	15.41	1145.33	73.5	--
XMW0447	Benzene, (2-methyl-1-propenyl)-	132.094	C10H12	1077	Aromatics	768-49-0	13.77	1090.39	94.8	--
XMW0019	Acetophenone, 4'-hydroxy-	136.052	C8H8O2	1457	Ketone	99-93-4	18.23	1242.63	82.34	ko01100
XMW0498	Phenol, 2-butyl-	150.104	C10H14O	1312	Aldehyde	3180-09-4	21.17	1349.6	65.76	--
XMW0935	(E)-2,6-Dimethylocta-2,5,7-trien-4-one	150.104	C10H14O	1239	Ketone	33746-72-4	18.15	1239.93	89.13	--
XMW0534	Bicyclo[3.1.1]hept-3-en-2-one, 4,6,6-trimethyl-, (1S)-	150.104	C10H14O	1119	Terpenes	1196-01-6	17.33	1210.65	95.99	--
XMW0889	Bicyclo[3.1.0]hex-2-ene, 4-methylene-1-(1-methylethyl)-	134.11	C10H14	956	Terpenes	36262-09-6	9.29	941.78	94.33	--
XMW0246	Oxiranecarboxaldehyde, 3-methyl-3-(4-methyl-3-pentenyl)-	168.115	C10H16O2	1215	Aldehyde	16996-12-6	20.03	1307	74.96	--
XMW1084	2-Butenoic acid, 3-hexenyl ester, (E,Z)-	168.115	C10H16O2	1199	Ester	65405-80-3	18.67	1258.43	64.56	--
XMW0537	1H-Inden-5-ol, 2,3-dihydro-	134.073	C9H10O	1267	Phenol	1470-94-6	18.56	1254.25	79.08	--
KMW0547	2-Cyclohexen-1-ol, 2-methyl-5-(1-methylethenyl)-, acetate	194.131	C12H18O2	1411	Ester	97-42-7	21.42	1358.92	92.46	--
XMW0936	Ethanone, 1-(4-ethylphenyl)-	148.089	C10H12O	1277	Ketone	937-30-4	18.3	1245.1	80.62	--
XMW0525	Benzene, 1-ethenyl-3,5-dimethyl-	132.094	C10H12	1110	Aromatics	5379-20-4	11.3	1009.48	78.54	--
XMW0926	Ethanone, 1-(2,4-dimethylphenyl)-	148.089	C10H12O	1221	Ketone	89-74-7	17.53	1217.77	78.67	--
KMW0554	.alpha.-Ionone	192.151	C13H20O	1422	Terpenes	127-41-3	20	1305.85	60.2	--
D276	Bicyclo[3.1.0]hex-3-en-2-one, 4-methyl-1-(1-methylethyl)-	150.104	C10H14O	1171	Terpenes	24545-81-1	15.71	1155.59	77.25	--
KMW0247	.beta.-Phellandrene	136.125	C10H16	1053	Terpenes	555-10-2	11.21	1006.67	78.34	--
WMW0023	(+)-alpha-Pinene	136.125	C10H16	948	Terpenes	7785-70-8	9	931.9	96.59	--
XMW1064	1,4-Methano-1H-Cyclopropa[d]pyridazine, 4,4a,5,5a-tetrahydro-6,6-dimethyl-, (1.alpha.,4.alpha.,4a.alpha.,5a.alpha.)-	136.1	C8H12N2	-	Heterocyclic compound	109746-10-3	9.08	934.61	60.37	--
XMW0945	trans-3(10)-Caren-2-ol	152.12	C10H16O	1194	Terpenes	1000151-66-5	17.67	1222.67	84.28	--
XMW0719	p-Mentha-1,5,8-triene	134.11	C10H14	1000	Terpenes	21195-59-5	11.18	1005.85	88.57	--
XMW0127	o-Cymene	134.11	C10H14	1042	Terpenes	527-84-4	11.82	1026.49	86.04	--
XMW0379	Bicyclo[5.2.0]nonane, 2-methylene-4,8,8-trimethyl-4-vinyl-	204.188	C15H24	1407	Terpenes	242794-76-9	23.2	1427.1	94.63	--
KMW0193	.beta.-Pinene	136.125	C10H16	981	Terpenes	127-91-3	10.33	976.9	95.49	--
XMW0144	(+)-2-Bornanone	152.12	C10H16O	1121	Terpenes	464-49-3	15.64	1153.32	91.9	ko00902,ko01110
KMW0329	Camphor	152.12	C10H16O	1139	Terpenes	76-22-2	15.64	1153.32	90.37	--
XMW0072	Cyclohexanemethanol, .alpha.,.alpha.-dimethyl-4-methylene-	154.136	C10H18O	1138	Alcohol	7299-42-5	16.31	1175.75	75.07	--
WMW0017	Bicyclo[2.2.1]heptane, 2,2-dimethyl-3-methylene-, (1S)-	136.125	C10H16	943	Terpenes	5794-04-7	9.49	948.41	95.5	ko00902,ko01100
WMW0019	(+)-alpha-Longipinene	204.188	C15H24	1403	Terpenes	5989-08-2	21.29	1354.17	69.2	--
XMW0853	(1S,4aR,7R,8aR)-1,4a-Dimethyl-7-(prop-1-en-2-yl)decahydronaphthalen-1-ol	222.198	C15H26O	1660	Terpenes	5945-72-2	28.99	1669.02	91.25	--
KMW0337	4-Isopropyl-1-methylcyclohex-2-enol	154.136	C10H18O	1145	Alcohol	619-62-5	14.17	1103.55	92.14	--
NMW0135	Thiocyanic acid, phenylmethyl ester	149.03	C8H7NS	1326	Sulfide	3012-37-1	23.04	1420.58	60.34	--
KMW0420	2-Cyclohexen-1-ol, 3-methyl-6-(1-methylethyl)-, trans-	154.136	C10H18O	1233	Alcohol	16721-39-4	20.78	1335.08	75.14	--
XMW1149	(1R,3aS,8aS)-1,4,4,6-Tetramethyl-1,2,3,3a,4,5,7,8-octahydrocyclopenta[c]pentalene	204.188	C15H24	1338	Terpenes	871660-96-7	24.45	1476.68	81.94	--
WMW0002	.alfa.-Copaene	204.188	C15H24	1221	Terpenes	1000360-33-0	21.95	1378.8	94.58	--
XMW0383	1,4,7,-Cycloundecatriene, 1,5,9,9-tetramethyl-, Z,Z,Z-	204.188	C15H24	1472	Alkanes	1000062-61-9	24.05	1460.7	96.57	--
XMW0176	[1α,4aα,8aα]-1,2,4a,5,6,8a-hexahydro-4-7-dimethyl-1-[1-methylethyl]naphthalene	204.188	C15H24	1440	Terpenes	31983-22-9	21.78	1372.33	92.21	--
WMW0013	Bicyclosesquiphellandrene	204.188	C15H24	1435	Terpenes	54324-03-7	24.68	1485.79	87.7	--
XMW0985	2-Isopropenyl-4a,8-dimethyl-1,2,3,4,4a,5,6,8a-octahydronaphthalene	204.188	C15H24	1494	Terpenes	1000193-57-0	24.9	1494.5	95.51	--
XMW0913	cis-Chrysanthenol	152.12	C10H16O	1162	Phenol	55722-60-6	16.07	1167.72	95.93	--
NMW0281	3-Butylisobenzofuran-1(3H)-one	190.099	C12H14O2	1656	Heterocyclic compound	6066-49-5	24.45	1476.82	63.36	--
XMW0906	Benzene, tert-butyl-	134.11	C10H14	975	Aromatics	98-06-6	15.57	1150.82	62.75	--
XMW0458	Pyridinium, 1-amino-, chloride	130.03	C5H7ClN2	-	Other	28460-19-7	16.33	1176.34	71.71	--
XMW0301	Mesitylene	120.094	C9H12	1020	Aromatics	108-67-8	10.8	992.97	92.69	--
KMW0448	D-Carvone	150.104	C10H14O	1255	Terpenes	2244-16-8	18.34	1246.57	94.33	ko00902,ko00903,ko01110
WMW0099	Cyclopentene, 1-butyl-	124.125	C9H16	938	Olefin	2423-01-0	10.33	977.07	62.85	--
XMW1336	N-Benzyloxy-2-carbomethoxyaziridine	207.09	C11H13NO3	1550	Ester	53084-33-6	24.49	1478.21	63.6	--
KMW0351	Pyrazine, 2,3-diethyl-5-methyl-	150.116	C9H14N2	1158	Heterocyclic compound	18138-04-0	17.33	1210.67	61.29	--
KMW0626	Naphthalene, 1,2,3,4-tetrahydro-1,6-dimethyl-4-(1-methylethyl)-, (1S-cis)-	202.172	C15H22	1523	Terpenes	483-77-2	25.62	1524.43	84.39	--
KMW0618	Naphthalene, 1,2,3,5,6,8a-hexahydro-4,7-dimethyl-1-(1-methylethyl)-, (1S-cis)-	204.188	C15H24	1519	Terpenes	483-76-1	25.53	1520.71	81.96	ko00909,ko01100,ko01110
KMW0643	Caryophyllene oxide	220.183	C15H24O	1573	Terpenes	1139-30-6	27.16	1588.86	67.5	--
XMW0136	4-Isopropyl-6-methyl-1-methylene-1,2,3,4-tetrahydronaphthalene	200.157	C15H20	1542	Terpenes	50277-34-4	26.11	1544.7	92.29	--
KMW0616	Naphthalene, 1,2,3,4,4a,5,6,8a-octahydro-7-methyl-4-methylene-1-(1-methylethyl)-, (1.alpha.,4a.beta.,8a.alpha.)-	204.188	C15H24	1543	Terpenes	39029-41-9	25.42	1516.2	90.28	--
XMW0713	2-Cyclohexen-1-one, 3-methyl-	110.073	C7H10O	962	Ketone	1193-18-6	12.89	1061.53	72.6	--
NMW0006	2-Cyclohexen-1-one, 3-methyl-6-(1-methylethylidene)-	150.104	C10H14O	1340	Terpenes	491-09-8	20.93	1340.42	80.76	--
KMW0516	.alpha.-Terpinyl acetate	196.146	C12H20O2	1352	Ester	80-26-2	21.11	1347.12	85.34	--
KMW0644	1H-Cycloprop[e]azulen-7-ol, decahydro-1,1,7-trimethyl-4-methylene-, [1ar-(1a.alpha.,4a.alpha.,7.beta.,7a.beta.,7b.alpha.)]-	220.183	C15H24O	1619	Terpenes	6750-60-3	27.03	1583.34	90.64	--
XMW0651	Pyridine, 2,3-dimethyl-	107.073	C7H9N	941	Heterocyclic compound	583-61-9	7.41	874.03	93.85	--
XMW0690	Cyclohexene, 2,4-dimethyl-1-(1-methylethenyl)-	150.141	C11H18	1108	Olefin	56763-60-1	18.46	1250.88	62.42	--
KMW0417	2-Cyclohexen-1-ol, 2-methyl-5-(1-methylethenyl)-, cis-	152.12	C10H16O	1229	Terpenes	1197-06-4	18.01	1235	87.71	ko00903
NMW0157	Acetamide, N-phenyl-	135.068	C8H9NO	1366	Amine	103-84-4	15.91	1162.31	65.51	--
XMW0822	Tricyclo[4.4.0.02,7]decane, 1-methyl-3-methylene-8-(1-methylethyl)-, stereoisomer	204.188	C15H24	1432	Terpenes	18252-44-3	23.37	1433.87	92.96	--
WMW0016	(-)-Bornyl acetate	196.146	C12H20O2	1277	Terpenes	5655-61-8	19.45	1285.88	95.85	--
D53	4-Terpinenyl acetate	196.146	C12H20O2	1301	Terpenes	4821-04-9	17.51	1217.14	84.92	--
KMW0389	Borneol	154.136	C10H18O	1162	Terpenes	507-70-0	19.45	1285.88	79.81	--
XMW0915	1,7,7-Trimethylbicyclo[2.2.1]hept-5-en-2-ol	152.12	C10H16O	1120	Terpenes	1000190-98-1	14.9	1128.33	81.34	--
XMW0772	1,3-Cyclopentanedione, 2-acetyl-4-methyl-	154.063	C8H10O3	1300	Ketone	4056-69-3	17.33	1210.84	63.35	--
XMW0197	(1S,4S,4aS)-1-Isopropyl-4,7-dimethyl-1,2,3,4,4a,5-hexahydronaphthalene	204.188	C15H24	1440	Terpenes	267665-20-3	23.74	1448.65	87.92	--
XMW0366	Benzene, 1,2,3,5-tetramethyl-	134.11	C10H14	1133	Aromatics	527-53-7	10.69	989.27	63.69	--
KMW0614	Cubenene	204.188	C15H24	1527	Terpenes	29837-12-5	25.88	1535.46	86.95	--
KMW0590	Naphthalene, 1,2,3,5,6,7,8,8a-octahydro-1,8a-dimethyl-7-(1-methylethenyl)-, [1R-(1.alpha.,7.beta.,8a.alpha.)]-	204.188	C15H24	1490	Terpenes	4630-07-3	24.73	1487.71	90.93	ko00909
KMW0407	2,4-Nonadienal, (E,E)-	138.104	C9H14O	1217	Aldehyde	5910-87-2	15.82	1159.24	61.43	--
XMW0682	Benzenemethanol, .alpha.-methyl-.alpha.-(1-methyl-2-propenyl)-	176.12	C12H16O	1308	Alcohol	61967-11-1	20.79	1335.15	66.7	--
XMW0885	Santolina triene	136.125	C10H16	908	Olefin	2153-66-4	8.66	920.42	93.64	--
WMW0050	2(4H)-Benzofuranone, 5,6,7,7a-tetrahydro-4,4,7a-trimethyl-, (R)-	180.115	C11H16O2	1532	Ester	17092-92-1	25.8	1532.12	68.93	--
D111	2-Propenal, 2-methyl-3-phenyl-	146.073	C10H10O	1309	Aldehyde	101-39-3	19.65	1293.06	67.46	--
XMW0676	Ethanone, 1-(3-methylphenyl)-	134.073	C9H10O	1142	Ketone	585-74-0	16.65	1187.16	75.27	--
KMW0158	Benzaldehyde	106.042	C7H6O	960	Aldehyde	100-52-7	9.82	959.87	83.88	--
KMW0552	(-)-.beta.-Bourbonene	204.188	C15H24	1417	Terpenes	5208-59-3	22.16	1386.73	82.48	--
XMW1148	Bicyclo[3.1.1]hept-2-ene-2-ethanol, 6,6-dimethyl-, (1R)-	166.136	C11H18O	1290	Alcohol	35836-73-8	20.19	1313	76.09	--
XMW0677	trans-p-Mentha-2,8-dienol	152.12	C10H16O	1120	Terpenes	1000139-65-3	14.57	1117.05	63.75	--
XMW1412	1H-3a,7-Methanoazulene, 2,3,4,7,8,8a-hexahydro-3,6,8,8-tetramethyl-, (3R,3aS,7S,8aR)-	204.188	C15H24	1389	Terpenes	65354-33-8	27.48	1602.1	67.24	--
XMW1489	Cadala-1(10),3,8-triene	202.172	C15H22	1555	Terpenes	1000140-05-6	26.59	1565.08	70.21	--
XMW0401	1H-Imidazole, 1-methyl-	82.053	C4H6N2	929	Heterocyclic compound	616-47-7	14.29	1107.75	68.88	--
XMW0733	7-Oxabicyclo[4.1.0]heptan-2-one, 3-methyl-6-(1-methylethyl)-	168.115	C10H16O2	1171	Terpenes	5729-99-7	18.72	1259.92	63.02	--
XMW1455	5-Amino-2-methoxyphenol	139.063	C7H9NO2	1402	Phenol	1687-53-2	17.93	1231.98	73.13	--
KMW0620	Benzene, 1-(1,5-dimethyl-4-hexenyl)-4-methyl-	202.172	C15H22	1553	Terpenes	644-30-4	24.6	1482.77	61.76	--
XMW0999	Isoaromadendrene epoxide	220.183	C15H24O	1589	Heterocyclic compound	1000159-36-6	29.16	1676.19	85.71	--
XMW1434	Cyclohexene, 3-(1-methylethyl)-	124.125	C9H16	924	Olefin	3983-08-2	7.54	879.21	82.05	--
KMW0284	Phenylethyl Alcohol	122.073	C8H10O	1118	Alcohol	60-12-8	14.51	1114.97	91.64	ko00360
XMW0545	Benzenemethanamine, N-(1-methylethyl)-	149.12	C10H15N	1226	Aromatics	102-97-6	14.45	1113.23	67.05	--
XMW0932	3-Nonen-5-yne, 4-ethyl-, (Z)-	150.141	C11H18	1117	Alkynes	74744-26-6	17.78	1226.59	71.41	--
KMW0479	1,3-Cyclohexadiene-1-carboxaldehyde, 2,6,6-trimethyl-	150.104	C10H14O	1300	Terpenes	116-26-7	12.97	1064.24	86.39	--
D333	(+)-cis-Verbenol, acetate	194.131	C12H18O2	1279	Ester	29135-27-1	19.31	1281.13	82.33	--
KMW0421	Methyl salicylate	152.047	C8H8O3	1234	Ester	119-36-8	16.84	1193.58	72.27	--
XMW0865	8-Isopropyl-1-methyltricyclo[4.4.0.02,7]dec-3-ene-3-carbaldehyde	218.167	C15H22O	1675	Aldehyde	41610-68-8	26.9	1577.97	84.67	--
KMW0066	Hexanal	100.089	C6H12O	801	Aldehyde	66-25-1	5.38	790.42	83.72	--
XMW1258	Acetic acid, (4,6,8,9-tetramethyl-3-oxabicyclo[3.3.1]non-6-en-1-yl)methyl ester	252.173	C15H24O3	1665	Terpenes	309722-81-4	23.87	1453.57	65.45	--
XMW1424	1H-1,2,3-Triazole	69.033	C2H3N3	-	Heterocyclic compound	288-36-8	24.71	1486.89	89.58	--
D414	Bicyclo[3.1.0]hex-3-en-2-one, 5-(1-methylethyl)-	136.089	C9H12O	1117	Ketone	36262-12-1	13.96	1096.54	85.31	--
KMW0492	2(3H)-Furanone, 5-ethyldihydro-	114.068	C6H10O2	1323	Ester	695-06-7	13.9	1094.58	60.04	--
XMW0053	1,2-Benzenedicarboxylic acid, bis(2-methylpropyl) ester	278.152	C16H22O4	1908	Ester	84-69-5	33.02	1857.26	76.27	--
KMW0212	Benzeneacetaldehyde	120.058	C8H8O	1049	Aldehyde	122-78-1	12.38	1044.89	92.09	ko00360,ko01100
XMW1159	5H-Oxazolo[3,2-a]pyridine-8-carbonitrile, 6-ethyl-2,3-dihydro-2,7-dimethyl-5-oxo-	218.106	C12H14N2O2	1897	Heterocyclic compound	1000337-58-3	28.77	1659.24	72.72	--
NMW0202	Phenol, 4-pentyl-	164.12	C11H16O	1464	Phenol	14938-35-3	26.47	1559.94	62.57	--
XMW0504	1H-Benzocycloheptene, 2,4a,5,6,7,8-hexahydro-3,5,5,9-tetramethyl-, (R)-	204.188	C15H24	1528	Terpenes	1461-03-6	25.14	1504.2	91.08	--
XMW1038	Longifolenaldehyde	220.183	C15H24O	1631	Terpenes	19890-84-7	26.5	1561.29	71.86	--
XMW1408	1H-Cyclopropa[a]naphthalene, 1a,2,3,3a,4,5,6,7b-octahydro-1,1,3a,7-tetramethyl-, [1aR-(1a.alpha.,3a.alpha.,7b.alpha.)]-	204.188	C15H24	1398	Terpenes	489-29-2	22.79	1410.8	93.17	--
XMW0994	3-Amino-2-naphthol	159.068	C10H9NO	1848	Cyclic hydrocarbon	5417-63-0	26.13	1545.81	61.94	--
KMW0077	Propanoic acid, propyl ester	116.084	C6H12O2	812	Ester	106-36-5	8.99	931.65	68.19	--
KMW0692	2-Pentadecanone, 6,10,14-trimethyl-	268.277	C18H36O	1770	Ketone	502-69-2	32.66	1839.57	94.79	--
KMW0565	Caryophyllene	204.188	C15H24	1467	Terpenes	87-44-5	23.87	1453.63	92.08	ko00909,ko01100,ko01110
KMW0478	cis-.beta.-Farnesene	204.188	C15H24	1300	Terpenes	28973-97-9	23.87	1453.63	95.52	--
XMW0001	Cyclohexanol	100.089	C6H12O	880	Alcohol	108-93-0	5.39	791.04	80.62	--
XMW1042	2(3H)-Naphthalenone, 4,4a,5,6,7,8-hexahydro-4a,5-dimethyl-3-(1-methylethylidene)-, (4ar-cis)-	218.167	C15H22O	1817	Terpenes	19598-45-9	30.75	1749	85.08	--
XMW0087	1-Pentanone, 1-(p-anisyl)-3-methyl-	206.131	C13H18O2	1552	Ketone	66333-82-2	19.61	1291.78	62.46	--
XMW0743	(-)-Aristolene	204.188	C15H24	1403	Terpenes	6831-16-9	28.06	1627.7	76.4	--
KMW0555	trans-.alpha.-Bergamotene	204.188	C15H24	1431	Olefin	13474-59-4	22.79	1410.88	62.08	--
XMW1140	2-methyl-5-propan-2-ylcyclohexa-2,5-diene-1,4-dione	164.084	C10H12O2	1250	Ketone	490-91-5	18.91	1266.81	61.62	--
XMW0852	l-Alanine, N-(2,3,4-trifluorobenzoyl)-, methyl ester	261.061	C11H10F3NO3	1548	Ester	1000299-62-7	24.98	1497.97	60.95	--
KMW0622	Cyclohexene, 3-(1,5-dimethyl-4-hexenyl)-6-methylene-, [S-(R*,S*)]-	204.188	C15H24	1560	Terpenes	20307-83-9	25.65	1525.52	92.71	--
XMW0739	1-Hexen, 2-(p-anisyl)-5-methyl-	204.151	C14H20O	1482	Olefin	1000149-26-7	31.08	1764.5	62.93	--
XMW1029	Longipinocarvone	218.167	C15H22O	-	Ketone	1000151-87-1	27.7	1611.9	82.6	--
XMW1109	Glutaric acid, 2-methylpent-3-yl propyl ester	258.183	C14H26O4	1725	Ester	1000359-50-9	27.13	1587.58	62.72	--
KMW0095	2-Hexenal	98.073	C6H10O	856	Aldehyde	505-57-7	6.7	845.89	72.4	--
WMW0031	Phenanthrene, 7-ethenyl-1,2,3,4,4a,4b,5,6,7,9,10,10a-dodecahydro-1,1,4a,7-tetramethyl-, [4aS-(4a.alpha.,4b.beta.,7.beta.,10a.beta.)]-	272.25	C20H32	1960	Terpenes	1686-56-2	35.31	1971.66	70.92	--
XMW0349	Isolongifolen-5-one	218.167	C15H22O	1587	Terpenes	1000159-37-1	27.13	1587.72	75.69	--
XMW0357	5-Amino-2-methyl-2H-tetrazole	99.054	C2H5N5	-	Heterocyclic compound	6154-04-7	24.78	1490.02	69.02	--
XMW0042	3H-1,2,4-Triazol-3-one, 1,2-dihydro-	85.028	C2H3N3O	1012	Heterocyclic compound	930-33-6	15.96	1164.08	87.52	--
XMW0921	1-Pentanone, 1-(2-thienyl)-	168.061	C9H12OS	1328	Ketone	53119-25-8	25.32	1511.93	65.2	--
XMW0083	2H-Cyclopropa[a]naphthalen-2-one, 1,1a,4,5,6,7,7a,7b-octahydro-1,1,7,7a-tetramethyl-, (1a.alpha.,7.alpha.,7a.alpha.,7b.alpha.)-	218.167	C15H22O	1574	Terpenes	6831-17-0	27.52	1603.92	62.53	--
XMW0863	7-Acetyl-2-hydroxy-2-methyl-5-isopropylbicyclo[4.3.0]nonane	238.193	C15H26O2	1685	Terpenes	96093-81-1	30.54	1739.15	64.44	--
KMW0610	Bornyl isovalerate	238.193	C15H26O2	1529	Ester	76-50-6	25.49	1519.14	88.11	--
XMW0148	1H-Tetrazol-5-amine	85.039	CH3N5	-	Heterocyclic compound	4418-61-5	20.52	1325.21	65.71	--
NMW0321	(Z)-3-Butylidene-4,5-dihydroisobenzofuran-1(3H)-one	190.099	C12H14O2	1740	Ester	81944-09-4	27.48	1602.11	60.37	--
KMW0050	2-Pentenal, (E)-	84.058	C5H8O	754	Aldehyde	1576-87-0	4.45	735.56	74.88	--
NMW0438	Methoxsalen	216.042	C12H8O4	2034	Heterocyclic compound	298-81-7	30.28	1727.36	70.32	--
WMW0006	(3aR,4R,7R)-1,4,9,9-Tetramethyl-3,4,5,6,7,8-hexahydro-2H-3a,7-methanoazulen-2-one	218.167	C15H22O	1743	Terpenes	3466-15-7	30.93	1757.22	61.62	--
NMW0467	4,4'-Ethylidenediphenol	214.099	C14H14O2	2126	Phenol	2081-08-5	30.58	1741.05	77.78	--
KMW0101	Butanoic acid, 2-methyl-	102.068	C5H10O2	873	Acid	116-53-0	7.16	864.05	62.98	--
KMW0591	Butanoic acid, 1,7,7-trimethylbicyclo[2.2.1]hept-2-yl ester, endo-	224.178	C14H24O2	1490	Ester	13109-70-1	22.97	1418.08	80.31	--
XMW0178	Acetic acid, (1,2,3,4,5,6,7,8-octahydro-3,8,8-trimethylnaphth-2-yl)methyl ester	250.193	C16H26O2	1763	Ester	314773-27-8	32.24	1819.06	80.17	--
XMW0227	aR-Himachalene	202.172	C15H22	1595	Terpenes	19419-67-1	25.93	1537.47	80.88	--
XMW0060	.alpha.-Dehydro-ar-himachalene	200.157	C15H20	1601	Terpenes	78204-62-3	25.35	1513.14	90.55	--
XMW0340	Cyclohexane, 1,1,3-trimethyl-2,3-epoxy-2-(3-methylcyclobuten-2-yl-1)-4-acetyloxy-	264.173	C16H24O3	1732	Ester	1000197-93-7	32.91	1851.94	70.05	--
WMW0194	Thujone	152.12	C10H16O	1103	Terpenes	546-80-5	14.3	1107.98	94.02	--
XMW0426	Phytol, acetate	338.318	C22H42O2	2168	Alcohol	1000375-01-4	33.06	1858.88	70.11	--
XMW0455	1,3-Benzenediol, 4,5-dimethyl-	138.068	C8H10O2	1348	Aromatics	527-55-9	19.14	1274.84	66.23	--
XMW0520	Nitroguanidine	104.033	CH4N4O2	-	Other	556-88-7	11.54	1017.52	62.9	--
XMW0633	Ethyl 4-(ethyloxy)-2-oxobut-3-enoate	172.074	C8H12O4	1204	Ester	1000305-38-2	10.27	975.17	62.52	--
NMW0048	Dextroamphetamine	135.105	C9H13N	1141	Amine	51-64-9	11.82	1026.69	62.41	--
NMW0318	Curcumenol	234.162	C15H22O2	1735	Terpenes	19431-84-6	30.99	1760.28	64.69	--
XMW0974	1,2,4-Methenoazulene, decahydro-1,5,5,8a-tetramethyl-, [1S-(1.alpha.,2.alpha.,3a.beta.,4.alpha.,8a.beta.,9R*)]-	204.188	C15H24	1374	Terpenes	1137-12-8	22.89	1414.73	87.36	--
XMW0987	Eudesma-2,4,11-triene	202.172	C15H22	1479	Terpenes	82462-31-5	22.06	1382.95	79.81	--
XMW0997	Bornyl tiglate	236.178	C15H24O2	1615	Ester	101223-92-1	27.57	1606.44	85.34	--
Note: The "kegg_map" indicated the pathways of metabolites annotated in KEGG database.

## Sheet: Table S4
Table S4 Quantative analyses of volatile metabolites of A. argyi and A. indica in different harvest periods
Index	Compounds	ARAE1	ARAE2	ARAE3	ARAM1	ARAM2	ARAM3	ARAL1	ARAL2	ARAL3	ARIE1	ARIE2	ARIE3	ARIM1	ARIM2	ARIM3	ARIL1	ARIL2	ARIL3	mix01	mix02	mix03
XMW0126	Benzene, 1-methyl-3-(1-methylethyl)-	1.75524e+08	1.49399e+08	1.6705e+08	2.98241e+08	3.28249e+08	3.34999e+08	1.06915e+09	8.67341e+08	9.61727e+08	1.21337e+07	6.84206e+06	7.21202e+06	3.88308e+07	2.8255e+07	3.24446e+07	6.17825e+07	5.56452e+07	6.13712e+07	4.03253e+08	3.71282e+08	2.31986e+08
NMW0043	Bicyclo[3.1.1]hept-2-en-6-one, 2,7,7-trimethyl-	1.2415e+08	1.7903e+08	2.95249e+08	7.08565e+08	9.47053e+08	6.02899e+08	8.05669e+08	6.65458e+08	1.24221e+09	2.22375e+07	2.26596e+06	2.72173e+06	7.56171e+06	4.59789e+06	6.50226e+06	1.36813e+07	8.31673e+06	1.22216e+07	4.58887e+08	4.03682e+08	3.11334e+08
NMW0231	Phenol, 2-methoxy-4-(2-propenyl)-, acetate	2.13828e+08	3.14137e+08	2.34461e+08	3.57933e+08	3.74164e+08	7.95271e+08	7.29839e+08	8.84738e+08	5.7607e+08	3.139e+07	1.83817e+07	1.17121e+07	8.41171e+07	7.11058e+07	1.40331e+08	4.53148e+07	5.18371e+07	5.23251e+07	4.28546e+08	4.37091e+08	3.03817e+08
KMW0259	.gamma.-Terpinene	1.31254e+08	1.09529e+08	1.20699e+08	2.2814e+08	1.95416e+08	1.70098e+08	6.14752e+08	5.88359e+08	4.25606e+08	1.01552e+07	1.24265e+07	6.38984e+06	1.57425e+07	1.04762e+07	1.29557e+07	1.68879e+07	1.23658e+07	1.27066e+07	2.30028e+08	2.09321e+08	1.62875e+08
NMW0175	Phenol, 4-(1,1-dimethylpropyl)-	3.41384e+07	8.039e+07	1.28619e+08	2.63417e+08	3.0571e+08	2.77212e+08	2.02947e+08	2.13373e+08	4.94929e+08	8.52697e+06	910146	799128	4.91525e+06	3.34594e+06	5.05469e+06	6.16187e+06	4.14408e+06	4.21658e+06	1.70435e+08	1.5436e+08	1.04222e+08
NMW0071	L-.alpha.-Terpineol	1.12418e+08	1.16891e+08	1.04063e+08	1.47901e+08	3.02642e+08	2.22408e+08	2.89126e+08	2.88711e+08	2.66049e+08	9.90164e+06	8.78895e+06	3.97546e+06	1.4254e+07	8.28122e+06	1.32049e+07	6.70636e+06	5.92112e+06	6.44641e+06	1.73756e+08	1.32193e+08	9.03937e+07
NMW0025	Acetic acid, phenyl ester	1.13382e+08	1.17473e+08	1.04515e+08	1.48059e+08	3.04317e+08	2.22408e+08	2.89126e+08	2.88643e+08	2.65972e+08	9.91482e+06	8.77203e+06	3.82403e+06	1.41864e+07	8.27651e+06	1.32228e+07	6.70413e+06	5.72083e+06	6.42458e+06	1.74025e+08	1.31066e+08	9.07044e+07
NMW0105	Phenol, 4-propyl-	1.13495e+08	1.16977e+08	1.04063e+08	1.47764e+08	3.02939e+08	2.22308e+08	2.88976e+08	2.88722e+08	2.65468e+08	9.90164e+06	8.80209e+06	3.97546e+06	1.4204e+07	8.27241e+06	1.32049e+07	6.76733e+06	5.91579e+06	6.44641e+06	1.73821e+08	1.32725e+08	9.07191e+07
KMW0178	Bicyclo[3.1.0]hexane, 4-methylene-1-(1-methylethyl)-	5.3165e+07	4.68541e+07	4.73776e+07	9.80696e+07	1.2148e+08	1.55177e+08	2.54355e+08	3.22893e+08	2.0653e+08	2.80719e+06	2.5659e+06	1.79478e+06	1.21247e+07	4.872e+06	6.38544e+06	7.96956e+06	6.80302e+06	7.36528e+06	1.1642e+08	1.1131e+08	6.98533e+07
KMW0218	Eucalyptol	4.67479e+07	5.00895e+07	4.39476e+07	7.66007e+07	7.74636e+07	6.01973e+07	2.99997e+08	2.74606e+08	2.02505e+08	3.18414e+06	6.23003e+06	2.08413e+06	6.97005e+06	2.88432e+06	4.40171e+06	7.56732e+06	4.01754e+06	4.73271e+06	9.45915e+07	1.016e+08	7.11328e+07
KMW0257	Bicyclo[3.1.0]hexan-2-ol, 2-methyl-5-(1-methylethyl)-, (1.alpha.,2.beta.,5.alpha.)-	4.70032e+07	5.05985e+07	4.36243e+07	7.67076e+07	7.7974e+07	6.03054e+07	2.9791e+08	2.72989e+08	2.01814e+08	3.31659e+06	6.30433e+06	2.28665e+06	7.12011e+06	3.23471e+06	4.47436e+06	7.75495e+06	4.08958e+06	4.78729e+06	9.58012e+07	1.01766e+08	7.1165e+07
XMW0909	2,6,6-Trimethylbicyclo[3.2.0]hept-2-en-7-one	4.0178e+07	7.26345e+07	9.2329e+07	1.44083e+08	2.23354e+08	1.56035e+08	2.1536e+08	1.95712e+08	3.49522e+08	4.77262e+06	1.07186e+06	936232	2.11841e+06	1.75157e+06	2.16295e+06	6.00105e+06	5.24857e+06	6.2794e+06	1.18197e+08	1.14013e+08	1.01077e+08
XMW0248	2-Cyclohexen-1-one, 3-methyl-6-(1-methylethenyl)-, (S)-	3.63314e+07	6.96022e+07	8.99407e+07	1.79209e+08	2.4656e+08	2.11508e+08	1.83828e+08	2.34255e+08	2.87359e+08	6.62789e+06	2.22384e+06	1.49262e+06	2.97221e+06	2.42177e+06	3.16886e+06	4.65826e+06	3.95776e+06	4.36824e+06	1.23889e+08	1.08695e+08	1.08669e+08
NMW0005	3-Cyclohexen-1-ol, 4-methyl-1-(1-methylethyl)-, (R)-	4.17373e+07	3.67243e+07	3.77818e+07	6.52067e+07	1.23587e+08	1.17317e+08	2.52826e+08	2.1043e+08	2.3399e+08	5.27759e+06	5.30159e+06	3.00971e+06	8.58494e+06	5.50318e+06	7.91772e+06	6.27577e+06	5.0078e+06	5.57439e+06	1.03248e+08	9.11034e+07	7.99784e+07
XMW1435	Isobutyric acid, 2-pinen-10-yl ester	3.79832e+07	6.51662e+06	5.04638e+06	1.11194e+07	2.10059e+07	1.83686e+07	1.77806e+08	2.32793e+08	2.68536e+08	2.02207e+06	2.18765e+06	878291	1.89025e+06	957940	1.4321e+06	1.91701e+06	719571	703191	7.54201e+07	5.92595e+07	4.47567e+07
KMW0153	α-thujene	7.17641e+07	5.92821e+07	5.89097e+07	8.33375e+07	9.63944e+07	1.34509e+08	1.97527e+08	2.77893e+08	1.73424e+08	2.49362e+06	3.09646e+06	2.03813e+06	6.32915e+06	3.80974e+06	5.1256e+06	6.82857e+06	6.23805e+06	5.16036e+06	1.05739e+08	1.12978e+08	6.65277e+07
XMW0933	Bicyclo[3.1.1]hept-2-en-6-ol, 2,7,7-trimethyl-, acetate, [1S-(1.alpha.,5.alpha.,6.beta.)]-	1.9265e+07	1.12399e+07	6.36979e+06	1.53307e+08	1.59578e+08	1.93016e+08	1.79734e+08	1.49544e+08	2.29225e+08	1.03186e+06	731627	609798	6.99298e+06	394006	537031	1.90032e+06	377534	503180	8.61813e+07	6.25621e+07	4.82902e+07
XMW0956	2-Cyclohexen-1-ol, 2-methyl-5-(1-methylethenyl)-, acetate, cis-	1.1193e+07	1.28194e+07	7.64286e+06	1.76701e+07	2.50425e+07	5.38486e+07	1.02509e+08	1.43941e+08	1.80482e+08	1.05026e+06	553480	521556	1.66564e+06	601493	599005	1.59514e+06	481115	503253	3.15747e+07	3.45251e+07	2.56363e+07
XMW0192	(+)-4-Carene	2.53582e+07	2.10175e+07	2.36119e+07	4.51895e+07	4.08504e+07	3.56814e+07	1.23436e+08	1.53476e+08	1.063e+08	1.38662e+06	1.66111e+06	923568	2.05213e+06	1.50386e+06	1.98912e+06	2.57405e+06	1.82261e+06	1.92684e+06	4.64524e+07	4.25531e+07	3.14974e+07
XMW0968	4,7,7-Trimethylbicyclo[4.1.0]hept-3-en-2-one	1.10551e+07	3.025e+07	3.25798e+07	6.68414e+07	9.34497e+07	9.28655e+07	4.41453e+07	3.99904e+07	2.46008e+08	1.49559e+06	201989	193768	490898	260238	452562	787695	732239	664881	4.33009e+07	3.91518e+07	5.20048e+07
XMW1134	Pyrimidine, 4-butyl-3,4-dihydro-5-methyl-	2.54747e+07	3.03751e+07	2.70901e+07	3.93834e+07	6.72598e+07	4.89848e+07	7.35615e+07	7.08291e+07	6.51793e+07	1	1	1	1	1	1	1	1	1	4.22193e+07	3.84433e+07	2.71116e+07
KMW0388	Carveol	1.44609e+07	1.75052e+07	1.89918e+07	3.33762e+07	5.40865e+07	6.66359e+07	5.03624e+07	5.26438e+07	6.45299e+07	1.51211e+06	987539	763760	3.25259e+06	1.89771e+06	2.81873e+06	5.4811e+06	4.6227e+06	3.86789e+06	3.26349e+07	3.42732e+07	2.23067e+07
KMW0413	(-)-Carvone	6.26741e+06	1.17569e+07	1.70979e+07	3.49155e+07	6.54999e+07	6.02543e+07	4.80467e+07	3.57683e+07	7.98281e+07	1	1	1	1.83669e+06	1.31539e+06	1.65299e+06	3.93852e+06	3.71421e+06	3.47914e+06	2.52e+07	2.37027e+07	1.96089e+07
KMW0489	1-Cyclohexene-1-carboxaldehyde, 4-(1-methylethenyl)-, (S)-	1.24639e+07	9.27244e+06	1.06148e+07	1.7878e+07	3.0839e+07	4.19836e+07	3.26321e+07	6.43097e+07	4.82804e+07	1.03546e+06	729296	553766	2.09202e+06	1.60783e+06	2.29674e+06	2.03194e+06	1.57567e+06	1.96426e+06	2.44066e+07	2.07964e+07	1.59882e+07
WMW0204	Bicyclo[3.1.0]hexan-3-ol, 4-methylene-1-(1-methylethyl)-, acetate	1.35484e+07	7.62778e+06	1.14093e+07	2.13758e+07	3.69696e+07	2.09554e+07	3.49843e+07	3.02593e+07	6.62373e+07	1	1	1	1	1	1	1	1	1	1.96563e+07	1.88937e+07	1.33844e+07
XMW0447	Benzene, (2-methyl-1-propenyl)-	1.64063e+07	1.50445e+07	1.37241e+07	2.72949e+07	3.8273e+07	3.41288e+07	4.45354e+07	3.99094e+07	3.76833e+07	3.9684e+06	2.95049e+06	2.32111e+06	5.12334e+06	5.93212e+06	6.2568e+06	7.82211e+06	8.00003e+06	7.10671e+06	3.05923e+07	2.43214e+07	1.91003e+07
XMW0019	Acetophenone, 4'-hydroxy-	1.19608e+07	1.62375e+07	1.98258e+07	1.57705e+07	1.82958e+07	3.09557e+07	4.88388e+07	2.32532e+07	3.33618e+07	1.57916e+06	964623	647109	973021	736182	1.18546e+06	727685	570372	625864	1.50308e+07	1.38156e+07	1.23441e+07
XMW0498	Phenol, 2-butyl-	7.99345e+06	1.25942e+07	1.05255e+07	1.76298e+07	1.76214e+07	3.97214e+07	3.05698e+07	4.00634e+07	3.32113e+07	1.39181e+06	868711	731041	3.59857e+06	3.0434e+06	5.32457e+06	2.4942e+06	2.63697e+06	2.67537e+06	1.82874e+07	1.82425e+07	1.3392e+07
XMW0935	(E)-2,6-Dimethylocta-2,5,7-trien-4-one	3.8025e+06	7.01239e+06	8.13216e+06	2.11779e+07	3.99905e+07	3.31363e+07	2.93925e+07	2.00253e+07	5.34807e+07	807324	302959	240494	1.24675e+06	1.13701e+06	1.17004e+06	959493	875340	907341	1.60742e+07	1.33652e+07	1.13943e+07
XMW0534	Bicyclo[3.1.1]hept-3-en-2-one, 4,6,6-trimethyl-, (1S)-	5.36473e+06	9.71088e+06	8.76596e+06	1.03488e+07	1.84063e+07	2.01801e+07	3.89897e+07	3.32458e+07	2.0559e+07	1.22918e+06	1.28206e+06	467147	1.69174e+06	1.38667e+06	1.77852e+06	5.465e+06	5.19884e+06	4.93877e+06	1.63793e+07	1.39033e+07	9.81181e+06
XMW0889	Bicyclo[3.1.0]hex-2-ene, 4-methylene-1-(1-methylethyl)-	8.02759e+06	8.20315e+06	8.66829e+06	8.44685e+06	1.16296e+07	2.31607e+07	3.27773e+07	3.55942e+07	2.36376e+07	1.03571e+06	799854	661137	1.21868e+06	1.13412e+06	1.32696e+06	1.03224e+06	902465	1.14857e+06	1.21575e+07	1.45641e+07	9.06077e+06
XMW0246	Oxiranecarboxaldehyde, 3-methyl-3-(4-methyl-3-pentenyl)-	1.01258e+07	1.91546e+07	2.07868e+07	1.21265e+07	1.6236e+07	2.23364e+07	2.53921e+07	3.06372e+07	2.64461e+07	364951	314320	360315	996690	665861	910040	812901	615635	614965	1.29496e+07	1.29491e+07	1.07953e+07
XMW1084	2-Butenoic acid, 3-hexenyl ester, (E,Z)-	2.678e+06	1.57915e+06	939596	2.22331e+07	1.94985e+07	2.47729e+07	2.45206e+07	2.04627e+07	2.87507e+07	1	1	1	1	1	1	1	1	1	1.17563e+07	9.22695e+06	6.64583e+06
XMW0537	1H-Inden-5-ol, 2,3-dihydro-	7.62712e+06	9.13373e+06	5.35223e+06	1.32465e+07	1.30723e+07	1.5165e+07	2.22632e+07	2.67117e+07	1.92818e+07	1.17331e+06	1.2658e+06	531263	947771	852838	1.42715e+06	852864	879749	649477	6.02583e+06	7.35715e+06	5.89177e+06
KMW0547	2-Cyclohexen-1-ol, 2-methyl-5-(1-methylethenyl)-, acetate	2.18986e+06	3.353e+06	2.41868e+06	2.83527e+06	3.26317e+06	3.48383e+06	1.56858e+07	1.53528e+07	3.41455e+07	645480	254279	306815	232402	120058	190787	283931	126699	134517	7.28219e+06	7.12559e+06	4.43311e+06
XMW0936	Ethanone, 1-(4-ethylphenyl)-	6.02272e+06	9.97718e+06	4.51105e+06	7.48065e+06	1.69406e+07	2.15309e+07	2.57655e+07	1.83955e+07	1.72219e+07	1.52502e+06	1.61477e+06	612544	2.54464e+06	2.15586e+06	2.95031e+06	2.91543e+06	2.7256e+06	2.52871e+06	1.25907e+07	1.12175e+07	9.15758e+06
XMW0525	Benzene, 1-ethenyl-3,5-dimethyl-	1.21529e+06	1.25251e+06	1.48354e+06	6.3814e+06	9.78853e+06	1.15823e+07	1.84417e+07	1.78648e+07	2.13136e+07	160142	95289.8	129685	330897	213595	268062	598969	525449	562792	4.59058e+06	3.91119e+06	2.94473e+06
XMW0926	Ethanone, 1-(2,4-dimethylphenyl)-	3.39244e+06	6.36804e+06	7.33462e+06	9.15116e+06	1.89162e+07	2.26807e+07	1.66005e+07	1.18713e+07	2.44492e+07	853049	350726	184417	439250	374653	529415	499103	543520	465502	9.23774e+06	7.79091e+06	5.03957e+06
KMW0554	.alpha.-Ionone	1.20968e+06	1.98596e+06	2.21866e+06	2.09415e+06	3.0969e+06	5.24285e+06	8.81567e+06	1.39805e+07	1.87853e+07	1	1	1	659384	423698	645752	712748	548161	535529	3.23694e+06	3.28718e+06	2.52603e+06
D276	Bicyclo[3.1.0]hex-3-en-2-one, 4-methyl-1-(1-methylethyl)-	2.84785e+06	2.6462e+06	2.78737e+06	3.33292e+06	5.0339e+06	3.25014e+06	1.20119e+07	9.90264e+06	9.48409e+06	1	1	1	1	1	1	1	1	1	4.52069e+06	4.13828e+06	3.37446e+06
KMW0247	.beta.-Phellandrene	1.8307e+08	1.43422e+08	1.76723e+08	7.83164e+07	1.01887e+08	1.20503e+08	3.30931e+08	3.53111e+08	2.72247e+08	7.92181e+06	6.83088e+06	5.06749e+06	1.36656e+07	1.01367e+07	1.27216e+07	1.58934e+07	1.05616e+07	1.40723e+07	1.37879e+08	1.51198e+08	9.68881e+07
WMW0023	(+)-alpha-Pinene	4.38442e+07	2.27459e+07	2.99378e+07	3.19177e+08	3.73339e+08	6.57447e+08	2.31381e+08	3.21295e+08	3.84465e+08	7.49334e+06	864345	9.06679e+06	1.0559e+08	8.46093e+07	7.93853e+07	6.44446e+07	7.52309e+07	6.65356e+07	1.69339e+08	2.11935e+08	7.56855e+07
XMW1064	1,4-Methano-1H-Cyclopropa[d]pyridazine, 4,4a,5,5a-tetrahydro-6,6-dimethyl-, (1.alpha.,4.alpha.,4a.alpha.,5a.alpha.)-	4.32269e+07	2.26036e+07	2.97142e+07	3.15085e+08	3.44865e+08	6.41411e+08	2.17449e+08	2.873e+08	3.57606e+08	7.60287e+06	938151	9.10576e+06	1.05877e+08	8.45144e+07	7.94e+07	6.40612e+07	7.24785e+07	6.6097e+07	1.67557e+08	2.05372e+08	7.32626e+07
XMW0945	trans-3(10)-Caren-2-ol	1.34324e+08	9.09829e+07	8.21191e+07	3.22881e+08	4.71472e+08	4.57761e+08	2.491e+08	2.36569e+08	3.54559e+08	4.24638e+07	3.26085e+07	1.59727e+07	5.38239e+07	4.1881e+07	5.94878e+07	4.19956e+07	4.09339e+07	4.27974e+07	1.88524e+08	2.01022e+08	1.33488e+08
XMW0719	p-Mentha-1,5,8-triene	1.54004e+08	1.21324e+08	1.40851e+08	9.9755e+07	1.33536e+08	1.61721e+08	2.72457e+08	2.90847e+08	2.27074e+08	1.20689e+07	8.84142e+06	6.98624e+06	2.1826e+07	1.74733e+07	2.24416e+07	2.56095e+07	1.97666e+07	2.23403e+07	1.39627e+08	1.43264e+08	9.41623e+07
XMW0127	o-Cymene	1.75524e+08	1.47924e+08	1.67092e+08	2.98846e+08	3.27716e+08	3.37821e+08	2.27897e+08	1.7892e+08	2.00074e+08	1.2061e+07	6.80428e+06	7.08356e+06	3.8711e+07	2.82209e+07	3.23714e+07	6.17825e+07	5.56113e+07	6.10528e+07	4.03071e+08	3.71282e+08	2.31494e+08
XMW0379	Bicyclo[5.2.0]nonane, 2-methylene-4,8,8-trimethyl-4-vinyl-	9.83134e+07	7.96968e+07	5.51072e+07	1.81197e+08	2.41211e+08	1.53078e+08	1.84789e+08	1.71206e+08	2.18171e+08	4.1259e+07	2.5399e+07	3.99276e+07	6.17063e+08	2.04168e+08	3.24383e+08	5.86438e+07	6.42878e+07	1.03418e+08	2.71817e+08	2.12974e+08	1.32093e+08
KMW0193	.beta.-Pinene	2.66434e+07	2.06799e+07	1.75439e+07	1.10705e+08	1.68181e+08	1.59053e+08	1.51921e+08	1.66235e+08	1.1137e+08	954623	141450	907249	1.34795e+07	7.322e+06	7.83739e+06	6.98377e+06	7.07568e+06	6.5398e+06	6.95752e+07	6.8676e+07	2.84848e+07
XMW0144	(+)-2-Bornanone	9.61211e+07	6.77461e+07	5.64925e+07	6.46254e+07	9.55846e+07	8.14195e+07	1.60985e+08	1.74499e+08	6.70414e+07	2.35637e+08	1.09442e+08	9.05437e+07	2.68527e+08	2.0044e+08	2.58663e+08	1.77313e+08	1.85943e+08	1.92325e+08	2.43417e+08	1.81091e+08	1.31672e+08
KMW0329	Camphor	9.60755e+07	6.76826e+07	5.64706e+07	6.46714e+07	9.54924e+07	8.10911e+07	1.60781e+08	1.74277e+08	6.68927e+07	2.35509e+08	1.09438e+08	9.05219e+07	2.68179e+08	2.00326e+08	2.58604e+08	1.77232e+08	1.85735e+08	1.92121e+08	2.43533e+08	1.80965e+08	1.3155e+08
XMW0072	Cyclohexanemethanol, .alpha.,.alpha.-dimethyl-4-methylene-	3.5377e+07	3.55707e+07	3.44476e+07	1	1	1	1.42255e+08	1.09437e+08	1.22381e+08	1	1	1	1	1	1	1	1	1	6.67067e+07	5.79958e+07	4.624e+07
WMW0017	Bicyclo[2.2.1]heptane, 2,2-dimethyl-3-methylene-, (1S)-	4.01753e+07	3.67275e+07	2.91085e+07	1.0659e+08	1.19051e+08	1.89124e+08	1.20618e+08	1.59164e+08	7.93044e+07	1.57035e+07	1.67586e+06	1.88102e+07	5.74888e+07	4.11472e+07	4.42496e+07	6.06959e+07	7.46812e+07	5.83478e+07	7.93025e+07	9.25396e+07	3.78328e+07
WMW0019	(+)-alpha-Longipinene	2.89535e+07	4.2135e+07	3.1654e+07	4.64961e+07	4.22873e+07	1.11333e+08	9.74646e+07	1.36385e+08	7.90135e+07	6.0628e+06	3.33789e+06	2.5978e+06	1.26901e+07	1.11316e+07	2.07683e+07	7.65993e+06	8.51418e+06	8.43253e+06	5.68271e+07	6.08697e+07	4.15082e+07
XMW0853	(1S,4aR,7R,8aR)-1,4a-Dimethyl-7-(prop-1-en-2-yl)decahydronaphthalen-1-ol	1.07738e+08	9.06024e+07	7.98608e+07	3.44401e+07	2.6206e+07	6.46519e+07	1.37985e+08	6.6189e+07	1.0851e+08	6.89525e+06	5.35063e+06	2.61339e+06	3.74142e+06	2.40097e+06	3.26641e+06	1.16083e+06	1.44781e+06	1.61496e+06	1.19276e+08	1.01965e+08	4.10548e+07
KMW0337	4-Isopropyl-1-methylcyclohex-2-enol	1.57716e+07	1.89545e+07	1.75354e+07	3.09386e+07	4.30202e+07	3.51734e+07	9.995e+07	1.03481e+08	9.29528e+07	3.66011e+06	2.34582e+06	1.76021e+06	5.32084e+06	3.08756e+06	3.4782e+06	1.34943e+07	1.39654e+07	1.56408e+07	4.10887e+07	4.55785e+07	3.4725e+07
NMW0135	Thiocyanic acid, phenylmethyl ester	1.33444e+07	3.11062e+07	3.30887e+07	6.9616e+07	9.51328e+07	1.00256e+08	4.61223e+07	4.26932e+07	1.9169e+08	8.32242e+06	2.38393e+06	3.80107e+06	2.49697e+07	7.11309e+06	1.03934e+07	6.65109e+06	6.5949e+06	7.06967e+06	4.52408e+07	4.15709e+07	5.19859e+07
KMW0420	2-Cyclohexen-1-ol, 3-methyl-6-(1-methylethyl)-, trans-	1.87355e+07	1.01305e+07	1.75774e+07	1	1	1	6.85035e+07	9.00989e+07	1.025e+08	1	1	1	1	1	1	1	1	1	4.33948e+06	4.78527e+06	3.61702e+06
XMW1149	(1R,3aS,8aS)-1,4,4,6-Tetramethyl-1,2,3,3a,4,5,7,8-octahydrocyclopenta[c]pentalene	1.46708e+08	1.02988e+08	8.35106e+07	3.81951e+07	5.80274e+07	3.74235e+07	9.90297e+07	6.36194e+07	9.02828e+07	3.11163e+06	3.25722e+06	2.19394e+06	1.21922e+07	4.61899e+06	5.7241e+06	2.29871e+06	2.44239e+06	2.32741e+06	7.48244e+07	6.18643e+07	3.43252e+07
WMW0002	.alfa.-Copaene	1.15678e+07	8.80578e+06	1.54772e+07	2.82605e+07	3.09436e+07	5.07214e+07	8.66096e+07	8.44564e+07	4.18307e+07	2.7196e+07	1.53161e+07	1.84901e+07	8.10924e+07	4.41726e+07	7.22337e+07	2.21187e+07	2.40231e+07	2.97721e+07	6.37405e+07	6.7386e+07	4.05814e+07
XMW0383	1,4,7,-Cycloundecatriene, 1,5,9,9-tetramethyl-, Z,Z,Z-	3.67409e+07	3.40651e+07	2.35805e+07	6.46195e+07	5.45486e+07	4.21681e+07	6.50685e+07	6.27759e+07	6.73219e+07	5.45783e+07	4.47155e+07	6.91504e+07	4.20003e+08	1.53772e+08	1.86253e+08	4.54034e+07	5.15226e+07	6.39375e+07	1.47336e+08	1.38872e+08	1.15366e+08
XMW0176	[1α,4aα,8aα]-1,2,4a,5,6,8a-hexahydro-4-7-dimethyl-1-[1-methylethyl]naphthalene	758018	847744	496114	2.36544e+06	2.53353e+06	3.53737e+06	6.73758e+07	7.55234e+07	3.87889e+07	1.18467e+07	4.03356e+06	7.51985e+06	1.44107e+07	8.89e+06	1.53732e+07	7.56774e+06	7.18347e+06	9.25845e+06	2.40021e+07	2.35937e+07	1.62363e+07
WMW0013	Bicyclosesquiphellandrene	1.3015e+07	9.74184e+06	1.59736e+07	7.20129e+07	8.74588e+07	3.94314e+07	8.3442e+07	3.73766e+07	5.70147e+07	2.1808e+07	1.41978e+07	1.27089e+07	3.02191e+08	6.94896e+07	1.18757e+08	2.37224e+07	2.84722e+07	3.51755e+07	8.12631e+07	7.74476e+07	4.39888e+07
XMW0985	2-Isopropenyl-4a,8-dimethyl-1,2,3,4,4a,5,6,8a-octahydronaphthalene	3.98457e+07	7.47162e+07	3.3119e+07	3.36288e+07	4.20919e+07	3.53404e+07	6.75279e+07	4.57903e+07	4.36933e+07	3.68695e+06	2.20064e+06	1.67245e+06	2.90689e+07	6.54032e+06	7.60711e+06	2.67581e+06	2.8603e+06	3.4023e+06	5.0674e+07	4.24404e+07	1.85349e+07
XMW0913	cis-Chrysanthenol	1.81004e+07	1.04505e+07	5.50279e+06	1	1	1	4.02552e+07	3.48558e+07	6.88411e+07	1	1	1	1	1	1	1	1	1	6.7348e+07	7.17903e+07	5.52864e+07
NMW0281	3-Butylisobenzofuran-1(3H)-one	5.93092e+07	5.08875e+07	3.81272e+07	2.54291e+07	3.77942e+07	2.53593e+07	4.95176e+07	3.43109e+07	4.43744e+07	1.36362e+07	7.20711e+06	7.93494e+06	2.66938e+07	8.00814e+06	1.03978e+07	4.46259e+06	5.57048e+06	5.5693e+06	4.8943e+07	3.57668e+07	2.36778e+07
XMW0906	Benzene, tert-butyl-	2.26191e+07	1.94356e+07	1.71112e+07	3.1486e+07	4.11783e+07	3.57742e+07	5.22715e+07	4.85998e+07	2.46649e+07	6.00561e+07	2.95621e+07	2.83852e+07	6.43333e+07	4.89344e+07	6.08118e+07	4.42434e+07	4.6574e+07	4.73006e+07	5.14407e+07	4.78522e+07	3.74301e+07
XMW0458	Pyridinium, 1-amino-, chloride	2.09359e+07	1.97547e+07	2.02654e+07	6.0976e+07	1.04389e+08	7.57772e+07	4.67413e+07	3.85031e+07	3.23907e+07	1.30943e+07	6.89022e+06	5.28128e+06	1.18799e+07	7.70611e+06	9.15325e+06	7.59618e+06	7.23147e+06	7.93991e+06	2.93301e+07	3.65052e+07	2.99166e+07
XMW0301	Mesitylene	4.88115e+06	4.72683e+06	4.63983e+06	5.25649e+07	8.12428e+07	1.02016e+08	4.73831e+07	1.44862e+07	5.57124e+07	684115	76428.7	163511	1.66184e+06	419618	729273	963919	1.01765e+06	756135	2.81526e+07	2.67796e+07	2.14268e+07
KMW0448	D-Carvone	3.29934e+07	2.26319e+07	1.9267e+07	5.18576e+07	1.08532e+08	1.06174e+08	3.89979e+07	3.40102e+07	3.34603e+07	6.43405e+06	5.58742e+06	2.64829e+06	2.13475e+07	1.67134e+07	2.31778e+07	2.94139e+07	2.46963e+07	2.66731e+07	4.81064e+07	4.39779e+07	3.13816e+07
WMW0099	Cyclopentene, 1-butyl-	6.56558e+06	5.3023e+06	4.19187e+06	2.73188e+07	4.46541e+07	3.8842e+07	3.64744e+07	4.13218e+07	2.70649e+07	755708	275530	651495	2.99864e+06	1.68756e+06	1.80665e+06	1.65913e+06	1.80593e+06	1.73836e+06	1.6477e+07	1.62769e+07	9.66522e+06
XMW1336	N-Benzyloxy-2-carbomethoxyaziridine	3.80371e+07	4.06515e+07	2.88157e+07	2.20859e+07	3.37799e+07	2.20919e+07	3.96034e+07	2.7559e+07	3.18835e+07	2.22633e+07	1.13211e+07	1.35525e+07	3.3893e+07	1.25894e+07	1.60481e+07	6.32373e+06	8.33445e+06	8.79363e+06	4.36924e+07	3.06919e+07	1.96092e+07
KMW0351	Pyrazine, 2,3-diethyl-5-methyl-	5.36473e+06	9.71088e+06	8.76596e+06	1.03488e+07	1.84063e+07	2.01801e+07	3.89897e+07	3.32458e+07	2.0606e+07	1.24303e+06	1.28206e+06	456163	1.69174e+06	1.38667e+06	1.77852e+06	5.465e+06	5.19884e+06	4.93877e+06	1.63793e+07	1.39033e+07	9.81181e+06
KMW0626	Naphthalene, 1,2,3,4-tetrahydro-1,6-dimethyl-4-(1-methylethyl)-, (1S-cis)-	9.80775e+06	8.33854e+06	1.3177e+07	1.15892e+07	2.37424e+07	1.534e+07	2.67285e+07	1.46548e+07	3.3818e+07	2.8089e+07	1.29305e+07	1.34028e+07	3.17565e+07	3.37108e+07	4.50321e+07	1.9498e+07	2.84866e+07	2.351e+07	4.25345e+07	3.0755e+07	1.8823e+07
KMW0618	Naphthalene, 1,2,3,5,6,8a-hexahydro-4,7-dimethyl-1-(1-methylethyl)-, (1S-cis)-	3.07087e+06	2.50048e+06	5.96556e+06	1.57773e+07	1.74572e+07	1.02696e+07	1.93881e+07	1.5309e+07	3.9039e+07	5.91269e+06	3.05861e+06	2.16309e+06	1.93734e+07	1.72354e+07	2.45971e+07	1.01764e+07	1.24546e+07	1.19807e+07	2.57057e+07	2.17366e+07	9.91586e+06
KMW0643	Caryophyllene oxide	2.89393e+07	2.95904e+07	2.39809e+07	2.00172e+07	2.22296e+07	1.72371e+07	2.84021e+07	2.40205e+07	1.70017e+07	6.92791e+07	4.66869e+07	3.12064e+07	6.67674e+07	6.5981e+07	7.79121e+07	5.48449e+07	6.61167e+07	7.21446e+07	5.57454e+07	5.8623e+07	3.60911e+07
XMW0136	4-Isopropyl-6-methyl-1-methylene-1,2,3,4-tetrahydronaphthalene	9.92835e+06	8.78622e+06	9.94493e+06	2.00961e+07	2.51952e+07	2.55808e+07	3.15385e+07	1.83691e+07	1.91202e+07	2.15046e+07	1.97123e+07	1.13127e+07	3.57717e+07	3.17696e+07	4.29343e+07	1.25251e+07	1.62419e+07	1.71083e+07	4.45424e+07	3.00619e+07	2.165e+07
KMW0616	Naphthalene, 1,2,3,4,4a,5,6,8a-octahydro-7-methyl-4-methylene-1-(1-methylethyl)-, (1.alpha.,4a.beta.,8a.alpha.)-	3.54289e+06	4.20581e+06	3.56517e+06	1.76469e+07	2.31703e+07	1.27276e+07	2.30997e+07	1.20092e+07	3.37836e+07	5.85686e+06	2.62038e+06	2.25205e+06	2.09602e+07	2.03734e+07	2.30827e+07	1.186e+07	1.6381e+07	1.44894e+07	2.43194e+07	2.19407e+07	1.17529e+07
XMW0713	2-Cyclohexen-1-one, 3-methyl-	4.36422e+07	4.78291e+07	3.83809e+07	1.44948e+07	2.07987e+07	1.53354e+07	2.23658e+07	2.07285e+07	2.089e+07	6.45784e+07	5.20391e+07	3.19545e+07	2.46874e+07	2.32383e+07	2.89812e+07	1.71493e+07	1.87749e+07	1.9527e+07	6.49451e+07	3.67996e+07	2.97432e+07
NMW0006	2-Cyclohexen-1-one, 3-methyl-6-(1-methylethylidene)-	3.22024e+06	6.14542e+06	8.33486e+06	1.29478e+07	1.41178e+07	4.0119e+07	1.86599e+07	2.0257e+07	2.1902e+07	602939	230470	215301	527447	486014	721037	706504	899621	737075	7.94944e+06	8.2235e+06	6.44574e+06
KMW0516	.alpha.-Terpinyl acetate	850789	8.52845e+06	1.52826e+06	7.65443e+06	9.76626e+06	1.1265e+07	1.73126e+07	2.0781e+07	2.16804e+07	1.72346e+06	797709	1.06158e+06	1.02007e+06	916618	1.33765e+06	808910	725137	779216	8.32024e+06	6.72642e+06	6.59688e+06
KMW0644	1H-Cycloprop[e]azulen-7-ol, decahydro-1,1,7-trimethyl-4-methylene-, [1ar-(1a.alpha.,4a.alpha.,7.beta.,7a.beta.,7b.alpha.)]-	1.1294e+07	1.19309e+07	8.55453e+06	7.90257e+06	9.57805e+06	8.29431e+06	1.80589e+07	1.69797e+07	2.38284e+07	9.40087e+06	4.51698e+06	3.22448e+06	1.28915e+07	1.1539e+07	1.59484e+07	1.5845e+07	2.4024e+07	2.67142e+07	2.48362e+07	2.51016e+07	1.25135e+07
XMW0651	Pyridine, 2,3-dimethyl-	2.10279e+06	1.73045e+06	1.84817e+06	432349	396416	893495	1.68279e+07	1.87256e+07	1.72459e+07	3.40976e+06	2.79117e+06	2.05571e+06	641339	785415	841001	1.79287e+07	1.53633e+07	1.38619e+07	5.25764e+06	7.07066e+06	4.76673e+06
XMW0690	Cyclohexene, 2,4-dimethyl-1-(1-methylethenyl)-	1.58238e+07	1.06212e+07	8.83753e+06	2.47307e+07	5.34163e+07	5.12315e+07	1.86291e+07	1.61427e+07	1.53434e+07	2.83693e+06	2.25672e+06	1.26051e+06	1.08368e+07	8.23407e+06	1.11264e+07	1.40936e+07	1.22619e+07	1.28668e+07	2.24617e+07	2.04733e+07	1.53403e+07
KMW0417	2-Cyclohexen-1-ol, 2-methyl-5-(1-methylethenyl)-, cis-	5.60485e+06	4.95119e+06	4.25129e+06	2.59775e+06	5.82657e+06	6.37485e+06	1.75461e+07	1.55948e+07	1.60288e+07	1.40192e+06	1.60438e+06	902448	2.95114e+06	2.06092e+06	3.27e+06	1.51104e+06	1.4468e+06	1.6064e+06	7.21347e+06	8.52262e+06	6.29989e+06
NMW0157	Acetamide, N-phenyl-	1.39262e+07	8.91573e+06	8.56197e+06	5.94424e+06	8.20336e+06	7.0792e+06	1.29913e+07	1.10994e+07	2.45634e+07	1	1	1	5.5955e+06	2.8959e+06	3.65379e+06	3.3942e+06	3.12309e+06	3.88629e+06	7.29681e+06	6.42998e+06	6.08695e+06
XMW0822	Tricyclo[4.4.0.02,7]decane, 1-methyl-3-methylene-8-(1-methylethyl)-, stereoisomer	4.05167e+06	3.90584e+06	4.61872e+06	1.48317e+07	2.1257e+07	1.03965e+07	1.93652e+07	1.20543e+07	1.55334e+07	3.69229e+06	2.81948e+06	3.82718e+06	2.78648e+07	1.14494e+07	1.79321e+07	3.94429e+06	5.15887e+06	4.93783e+06	2.00686e+07	1.38935e+07	9.73192e+06
WMW0016	(-)-Bornyl acetate	7.5007e+07	1.20073e+08	8.13965e+07	1.05486e+08	1.45382e+08	1.69719e+08	1.041e+07	2.91785e+07	5.2955e+06	2.10521e+07	1.01434e+07	1.15406e+07	1.53529e+07	1.14005e+07	1.4073e+07	1.22329e+07	1.06446e+07	1.0449e+07	7.32645e+07	6.06567e+07	4.78221e+07
D53	4-Terpinenyl acetate	2.7124e+06	5.37082e+06	6.1141e+06	309079	1.23156e+06	785984	1.42079e+07	1.13934e+07	1.86015e+07	1.12698e+06	693394	480475	572340	409799	460686	608113	716245	724369	7.55851e+06	6.44166e+06	4.42284e+06
KMW0389	Borneol	7.60378e+07	1.2099e+08	8.19501e+07	1.04465e+08	1.44285e+08	1.69385e+08	9.67163e+06	2.88126e+07	4.81888e+06	2.0892e+07	1.0148e+07	1.13965e+07	1.53728e+07	1.12668e+07	1.40191e+07	1.22507e+07	1.04365e+07	1.03011e+07	7.16408e+07	5.99748e+07	4.77136e+07
XMW0915	1,7,7-Trimethylbicyclo[2.2.1]hept-5-en-2-ol	3.53572e+06	2.32962e+06	2.54176e+06	2.24393e+07	4.82132e+07	3.29483e+07	1.31556e+07	9.94167e+06	1.98044e+07	917597	660479	443557	2.92113e+06	2.06623e+06	2.90844e+06	6.35881e+06	6.59873e+06	6.73585e+06	1.32263e+07	1.35779e+07	9.88898e+06
XMW0772	1,3-Cyclopentanedione, 2-acetyl-4-methyl-	2.57746e+07	2.68602e+07	3.19099e+07	3.43949e+06	5.548e+06	5.74536e+06	1.34193e+07	9.65078e+06	1.31218e+07	1	1	1	1	1	1	1	1	1	6.85026e+06	1.17414e+07	7.60971e+06
XMW0197	(1S,4S,4aS)-1-Isopropyl-4,7-dimethyl-1,2,3,4,4a,5-hexahydronaphthalene	2.61108e+06	2.21815e+06	2.27555e+06	7.77138e+06	1.86724e+07	8.10561e+06	1.10379e+07	1.03972e+07	1.43511e+07	1.67107e+06	1.39938e+06	1.4584e+06	1.34951e+07	7.3956e+06	1.12783e+07	2.8106e+06	3.82369e+06	3.70901e+06	1.61017e+07	8.99155e+06	8.133e+06
XMW0366	Benzene, 1,2,3,5-tetramethyl-	5.34679e+06	5.08649e+06	5.60044e+06	1.05408e+07	1.55182e+07	2.06184e+07	1.20175e+07	1.2928e+07	7.71608e+06	529881	434913	355354	1.13853e+06	672857	958792	2.1063e+06	1.76812e+06	1.71915e+06	1.08436e+07	1.03945e+07	6.91431e+06
KMW0614	Cubenene	1.29407e+06	971366	2.05151e+06	5.49787e+06	7.69973e+06	6.19764e+06	1.04774e+07	5.90415e+06	1.46158e+07	2.41235e+06	1.78679e+06	1.24172e+06	7.54794e+06	8.7939e+06	1.0083e+07	3.0899e+06	3.31737e+06	3.94893e+06	7.54129e+06	7.16121e+06	5.62515e+06
KMW0590	Naphthalene, 1,2,3,5,6,7,8,8a-octahydro-1,8a-dimethyl-7-(1-methylethenyl)-, [1R-(1.alpha.,7.beta.,8a.alpha.)]-	2.07081e+06	1.95344e+06	3.08751e+06	1.33323e+07	1.49959e+07	5.71553e+06	1.51029e+07	6.03934e+06	9.26013e+06	1.65723e+07	6.59342e+06	7.32437e+06	1.09148e+08	2.11405e+07	4.38783e+07	1.21524e+07	1.41886e+07	1.65159e+07	2.52429e+07	2.4706e+07	1.22931e+07
KMW0407	2,4-Nonadienal, (E,E)-	5.09067e+06	3.27942e+06	2.82887e+06	7.68127e+06	1.58751e+07	8.99704e+06	1.18445e+07	8.80858e+06	8.24839e+06	2.72034e+06	1.60402e+06	1.43067e+06	2.83029e+06	2.08594e+06	2.30353e+06	2.52019e+06	2.89757e+06	2.30147e+06	8.08062e+06	6.71858e+06	5.25674e+06
XMW0682	Benzenemethanol, .alpha.-methyl-.alpha.-(1-methyl-2-propenyl)-	3.28222e+07	1.75696e+07	3.01327e+07	4.28681e+06	5.02917e+06	8.81784e+06	8.20246e+06	1.05558e+07	1.00689e+07	1	1	1	2.39637e+06	1.84524e+06	2.11275e+06	1.31264e+06	1.47729e+06	1.47408e+06	1.06725e+07	1.1331e+07	8.44654e+06
XMW0885	Santolina triene	1.82563e+08	9.44179e+07	7.57573e+07	6.16172e+06	1.06192e+07	9.92544e+06	9.76673e+06	1.12322e+07	7.67815e+06	1.90756e+06	432317	1.4302e+06	4.78909e+06	2.72134e+06	2.82281e+06	4.70837e+06	5.57631e+06	3.96076e+06	3.2267e+07	3.61769e+07	2.33661e+07
WMW0050	2(4H)-Benzofuranone, 5,6,7,7a-tetrahydro-4,4,7a-trimethyl-, (R)-	1.49841e+07	1.8381e+07	2.10745e+07	5.47894e+06	1.01446e+07	1.01272e+07	8.2095e+06	5.41355e+06	1.49963e+07	4.37628e+07	2.80292e+07	1.87087e+07	1.37299e+07	1.32563e+07	1.42753e+07	6.56165e+06	1.11668e+07	8.85656e+06	1.24952e+07	1.65118e+07	1.08214e+07
D111	2-Propenal, 2-methyl-3-phenyl-	357788	535401	532024	4.69877e+06	5.05164e+06	1.12464e+07	7.82556e+06	1.01849e+07	1.03422e+07	1	1	1	1	1	1	1	1	1	3.0742e+06	3.71166e+06	2.92836e+06
XMW0676	Ethanone, 1-(3-methylphenyl)-	2.54006e+06	2.67666e+06	1.9897e+06	1.03217e+07	2.54098e+07	2.07703e+07	1.01936e+07	6.30202e+06	1.08457e+07	2.93689e+06	1.79013e+06	1.75269e+06	4.88767e+06	3.46025e+06	4.15602e+06	7.3204e+06	8.1189e+06	8.59443e+06	9.72249e+06	8.56938e+06	8.15104e+06
KMW0158	Benzaldehyde	4.93253e+06	4.59055e+06	5.15846e+06	3.14339e+06	5.07582e+06	7.35418e+06	1.09704e+07	8.47312e+06	6.37623e+06	6.4831e+06	3.51004e+06	3.33664e+06	4.49253e+06	4.52808e+06	5.09584e+06	6.88964e+06	9.36364e+06	8.69986e+06	5.87955e+06	7.29604e+06	5.54265e+06
KMW0552	(-)-.beta.-Bourbonene	2.81758e+06	3.3067e+06	3.35976e+06	4.17328e+06	4.55164e+06	1.22222e+07	1.04287e+07	9.58063e+06	5.62978e+06	1.32736e+07	5.73494e+06	8.41363e+06	1.25595e+07	1.03965e+07	1.09779e+07	6.22906e+06	5.56693e+06	5.15142e+06	9.76765e+06	1.04496e+07	7.14947e+06
XMW1148	Bicyclo[3.1.1]hept-2-ene-2-ethanol, 6,6-dimethyl-, (1R)-	995685	2.14404e+06	3.01926e+06	4.24837e+06	6.4344e+06	1.13545e+07	1.12783e+07	1.93974e+06	1.03228e+07	1.00313e+06	292652	442695	1	1	1	1	1	1	3.6573e+06	3.19987e+06	2.56839e+06
XMW0677	trans-p-Mentha-2,8-dienol	1.97269e+07	6.88303e+06	7.15339e+06	5.91436e+06	6.92731e+06	5.31839e+06	5.75275e+06	5.43244e+06	6.25008e+06	1	1	1	1	1	1	1	1	1	5.04623e+06	5.09159e+06	4.38545e+06
XMW1412	1H-3a,7-Methanoazulene, 2,3,4,7,8,8a-hexahydro-3,6,8,8-tetramethyl-, (3R,3aS,7S,8aR)-	8.33502e+06	7.98962e+06	7.57238e+06	3.45642e+06	4.83524e+06	4.94995e+06	7.32992e+06	5.37296e+06	3.84398e+06	6.3262e+08	2.87669e+08	2.68183e+08	3.53993e+08	2.44188e+08	3.37263e+08	1.68598e+08	2.08774e+08	1.79625e+08	1.75336e+08	1.68215e+08	8.24673e+07
XMW1489	Cadala-1(10),3,8-triene	1.78809e+06	1.4328e+06	1.95299e+06	2.91381e+06	7.52514e+06	6.35702e+06	5.55632e+06	3.35881e+06	7.5122e+06	6.41153e+06	4.60336e+06	2.29578e+06	6.87603e+06	7.55641e+06	1.03848e+07	3.6967e+06	4.04805e+06	4.28505e+06	9.78161e+06	5.34621e+06	4.24469e+06
XMW0401	1H-Imidazole, 1-methyl-	2.67447e+07	1.68555e+07	1.55494e+07	1.95787e+06	2.25889e+06	2.21225e+06	6.58243e+06	5.1421e+06	4.4365e+06	1.88324e+06	1.11299e+06	855744	1.97491e+06	1.39628e+06	1.82691e+06	3.80755e+06	3.83501e+06	4.04844e+06	1.03604e+07	9.73645e+06	7.85566e+06
XMW0733	7-Oxabicyclo[4.1.0]heptan-2-one, 3-methyl-6-(1-methylethyl)-	2.08151e+06	3.757e+06	2.56898e+06	4.49095e+06	4.98865e+06	5.75671e+06	5.97737e+06	4.8892e+06	4.90026e+06	1	1	1	203229	114118	111704	1	1	1	3.09365e+06	2.47629e+06	1.85501e+06
XMW1455	5-Amino-2-methoxyphenol	1.54655e+07	1.42744e+07	1.19721e+07	1.82844e+06	4.97431e+06	5.40717e+06	4.98438e+06	3.63719e+06	6.95063e+06	2.19585e+07	1.26373e+07	9.24428e+06	3.19022e+06	2.81552e+06	4.21822e+06	3.16369e+06	5.49447e+06	4.27872e+06	7.57144e+06	8.83511e+06	5.86098e+06
KMW0620	Benzene, 1-(1,5-dimethyl-4-hexenyl)-4-methyl-	635345	2.5751e+06	2.83932e+06	2.54461e+06	6.64015e+06	4.90933e+06	4.72268e+06	2.5045e+06	8.33626e+06	421195	189835	144367	580529	213407	296535	90399.3	192674	171416	4.0737e+06	4.27437e+06	1.55389e+06
XMW0999	Isoaromadendrene epoxide	3.83941e+06	5.53712e+06	3.39419e+06	2.63319e+06	3.99156e+06	7.16865e+06	7.70323e+06	3.76854e+06	2.77699e+06	8.08164e+06	4.70221e+06	5.98126e+06	1.6225e+07	8.1355e+06	1.59034e+07	1.3967e+07	1.84013e+07	1.79982e+07	8.12964e+06	1.34367e+07	6.17396e+06
XMW1434	Cyclohexene, 3-(1-methylethyl)-	1.48202e+06	1.39404e+06	1.70861e+06	899760	1.30588e+06	2.35539e+06	5.35347e+06	5.26595e+06	3.60047e+06	2.81492e+06	1.80732e+06	1.93079e+06	1.92444e+06	1.98751e+06	2.23152e+06	4.57646e+06	5.3878e+06	3.99086e+06	1.78126e+06	3.24337e+06	2.16222e+06
KMW0284	Phenylethyl Alcohol	1.28896e+07	1.15036e+07	1.16893e+07	3.06589e+06	4.71516e+06	3.73873e+06	5.35294e+06	3.85291e+06	4.92466e+06	1.19086e+07	7.33739e+06	5.06407e+06	2.83846e+07	3.43732e+07	2.74682e+07	3.84353e+07	4.13333e+07	5.12196e+07	2.47618e+07	7.04968e+07	7.45883e+07
XMW0545	Benzenemethanamine, N-(1-methylethyl)-	1.28896e+07	1.15036e+07	1.16893e+07	3.06589e+06	4.71516e+06	3.72659e+06	5.35294e+06	3.85291e+06	4.89555e+06	9.76123e+06	6.49254e+06	4.45231e+06	2.58662e+07	3.33032e+07	2.62284e+07	3.70121e+07	4.09194e+07	4.96507e+07	2.60394e+07	7.21155e+07	7.58124e+07
XMW0932	3-Nonen-5-yne, 4-ethyl-, (Z)-	273472	1.10744e+06	1.40436e+06	2.9654e+06	4.40483e+06	4.52458e+06	4.80884e+06	4.03912e+06	4.57749e+06	1	1	1	1	1	1	1	1	1	2.10522e+06	2.25554e+06	2.21139e+06
KMW0479	1,3-Cyclohexadiene-1-carboxaldehyde, 2,6,6-trimethyl-	1.17536e+06	1.5656e+06	1.14538e+06	7.08377e+06	1.06007e+07	8.14618e+06	3.89917e+06	2.84064e+06	6.59427e+06	716994	657203	458320	863897	376929	381747	432105	432301	398388	3.61226e+06	3.41705e+06	2.90093e+06
D333	(+)-cis-Verbenol, acetate	1.59884e+06	1.24628e+06	2.34253e+06	4.27351e+06	9.36049e+06	1.0561e+07	3.38579e+06	5.36581e+06	4.33515e+06	1	1	1	1	1	1	1	1	1	4.42866e+06	3.06588e+06	2.13993e+06
KMW0421	Methyl salicylate	342369	232692	243906	456120	772326	1.49127e+06	3.38169e+06	2.87888e+06	4.36088e+06	431420	464234	185898	1.19554e+06	1.32872e+06	1.47908e+06	3.00234e+06	2.62405e+06	2.87482e+06	1.18085e+06	1.85614e+06	2.97751e+06
XMW0865	8-Isopropyl-1-methyltricyclo[4.4.0.02,7]dec-3-ene-3-carbaldehyde	4.84919e+06	4.63637e+06	3.68964e+06	2.33908e+06	3.58992e+06	2.86166e+06	3.24275e+06	2.09506e+06	4.52371e+06	4.50544e+06	2.10904e+06	1.44972e+06	1.40215e+06	1.30627e+06	2.36022e+06	635212	790973	868641	3.67342e+06	3.72918e+06	2.58209e+06
KMW0066	Hexanal	3.65727e+06	2.48871e+06	3.36638e+06	714586	861195	1.13855e+06	2.39232e+06	3.13112e+06	3.50407e+06	2.56949e+06	2.01879e+06	2.41913e+06	1.28373e+06	1.31128e+06	1.26877e+06	3.40204e+06	2.71333e+06	2.66003e+06	2.30543e+06	3.28912e+06	2.3153e+06
XMW1258	Acetic acid, (4,6,8,9-tetramethyl-3-oxabicyclo[3.3.1]non-6-en-1-yl)methyl ester	1.36797e+07	1.87308e+07	1.41038e+07	3.46469e+07	3.78489e+07	2.07322e+07	2.76524e+06	2.69321e+06	3.56414e+06	7.05237e+07	4.13433e+07	5.23362e+07	1.54046e+08	7.12398e+07	9.78372e+07	1.96683e+07	2.38487e+07	2.74263e+07	5.85587e+07	5.07725e+07	3.17344e+07
XMW1424	1H-1,2,3-Triazole	1.26648e+07	1.33001e+07	1.90551e+07	1.9455e+07	1.87192e+07	1.00881e+07	4.87177e+06	2.27117e+06	1.65388e+06	9.8396e+06	4.6817e+06	4.93229e+06	3.00408e+07	9.49714e+06	1.58373e+07	6.06053e+06	7.68536e+06	7.33161e+06	1.26801e+07	1.47421e+07	8.71852e+06
D414	Bicyclo[3.1.0]hex-3-en-2-one, 5-(1-methylethyl)-	1.24442e+06	1.1666e+06	708506	1.71691e+07	3.14544e+07	2.17548e+07	3.85058e+06	1.65617e+06	3.1577e+06	621701	451448	413284	912676	570034	690130	662408	707948	633562	8.42823e+06	7.89962e+06	6.71845e+06
KMW0492	2(3H)-Furanone, 5-ethyldihydro-	1.8575e+06	1.11309e+06	397537	5.82564e+06	1.44836e+07	1.08532e+07	2.43792e+06	2.03396e+06	4.06613e+06	143242	170753	92378.5	343991	283736	249179	162400	181348	170037	5.15773e+06	4.38212e+06	3.80249e+06
XMW0053	1,2-Benzenedicarboxylic acid, bis(2-methylpropyl) ester	3.53072e+06	4.50785e+06	4.81737e+06	2.28965e+06	2.94905e+06	3.1992e+06	3.62183e+06	1.99821e+06	2.87521e+06	7.44076e+06	1.08268e+07	5.17796e+06	6.66308e+06	6.26938e+06	5.37671e+06	2.44531e+06	3.16971e+06	2.33813e+06	4.16e+06	7.18534e+06	3.36847e+06
KMW0212	Benzeneacetaldehyde	1.36357e+07	1.27095e+07	1.37516e+07	1.44866e+07	1.71776e+07	1.65128e+07	2.87546e+06	2.92682e+06	2.65839e+06	2.44679e+07	1.72597e+07	1.15641e+07	1.40827e+07	1.36978e+07	1.50071e+07	2.21096e+06	2.25185e+06	3.06363e+06	1.54166e+07	1.83198e+07	1.43623e+07
XMW1159	5H-Oxazolo[3,2-a]pyridine-8-carbonitrile, 6-ethyl-2,3-dihydro-2,7-dimethyl-5-oxo-	5.70196e+06	6.81377e+06	8.61278e+06	3.17086e+06	2.0544e+06	3.74051e+06	3.95128e+06	2.12812e+06	1.97691e+06	2.33477e+09	1.43088e+09	1.62438e+09	1.97344e+09	1.31633e+09	1.69973e+09	7.59676e+08	1.04926e+09	9.83779e+08	6.84436e+08	6.82973e+08	3.81188e+08
NMW0202	Phenol, 4-pentyl-	3.88604e+06	3.34419e+06	2.81414e+06	1.53307e+06	3.32858e+06	3.41682e+06	2.76072e+06	2.21379e+06	3.01604e+06	1.93478e+06	1.7542e+06	785709	2.58289e+06	2.97985e+06	3.00554e+06	2.57335e+06	3.08425e+06	2.6634e+06	4.87074e+06	3.11846e+06	2.2627e+06
XMW0504	1H-Benzocycloheptene, 2,4a,5,6,7,8-hexahydro-3,5,5,9-tetramethyl-, (R)-	1.80439e+06	2.22254e+06	3.47667e+06	6.12093e+06	4.39904e+06	1.91704e+06	3.37873e+06	2.20571e+06	2.30818e+06	2.36299e+07	8.31294e+06	1.04872e+07	4.67861e+07	1.79554e+07	2.51216e+07	7.41309e+06	1.00648e+07	1.10221e+07	1.27685e+07	1.19635e+07	8.1565e+06
XMW1038	Longifolenaldehyde	3.86562e+06	3.30064e+06	2.76669e+06	1.57631e+06	3.16636e+06	3.38438e+06	2.74609e+06	2.17133e+06	2.81047e+06	1.76507e+06	1.51135e+06	737179	2.54556e+06	3.03098e+06	2.99326e+06	2.58792e+06	3.39501e+06	2.48776e+06	4.72562e+06	3.11231e+06	2.26245e+06
XMW1408	1H-Cyclopropa[a]naphthalene, 1a,2,3,3a,4,5,6,7b-octahydro-1,1,3a,7-tetramethyl-, [1aR-(1a.alpha.,3a.alpha.,7b.alpha.)]-	114641	184679	359117	678018	1.07473e+06	642775	2.30208e+06	3.16983e+06	2.20477e+06	3.86677e+06	3.32494e+06	3.9455e+06	2.59513e+08	1.03306e+08	1.61411e+08	2.23631e+07	2.24656e+07	3.53155e+07	7.45207e+07	6.64508e+07	3.43819e+07
XMW0994	3-Amino-2-naphthol	1.02262e+06	955846	1.18184e+06	1.94543e+06	2.89401e+06	2.66184e+06	3.0798e+06	1.67762e+06	2.65508e+06	2.26624e+06	1.89068e+06	1.55975e+06	3.80562e+06	2.82166e+06	4.4887e+06	1.45678e+06	1.63277e+06	1.66862e+06	4.49844e+06	3.23739e+06	2.43109e+06
KMW0077	Propanoic acid, propyl ester	366708	212833	224160	2.27927e+06	2.80278e+06	5.49245e+06	1.9021e+06	2.50874e+06	2.80965e+06	59429.4	11566	63937.6	769716	657370	574455	527971	569593	498167	1.32486e+06	1.52706e+06	811626
KMW0692	2-Pentadecanone, 6,10,14-trimethyl-	1.96591e+07	2.08731e+07	2.24503e+07	2.9968e+06	3.06381e+06	3.57611e+06	2.4026e+06	1.78038e+06	2.10918e+06	2.20716e+07	1.97343e+07	2.93972e+07	4.48522e+06	3.28892e+06	3.43491e+06	1.72553e+06	2.49799e+06	1.69728e+06	6.64319e+06	6.94868e+06	5.08121e+06
KMW0565	Caryophyllene	2.90828e+07	3.85043e+07	3.04146e+07	6.86995e+07	6.90984e+07	3.91956e+07	1.66744e+06	2.34437e+06	2.08474e+06	1.3468e+08	7.52862e+07	9.49342e+07	2.44712e+08	1.10926e+08	1.49308e+08	3.65226e+07	4.43345e+07	4.97997e+07	1.02837e+08	9.76125e+07	6.23144e+07
KMW0478	cis-.beta.-Farnesene	2.98113e+07	3.97667e+07	3.09266e+07	6.91579e+07	6.87449e+07	3.9409e+07	1.65946e+06	2.27659e+06	2.05033e+06	1.35287e+08	7.50825e+07	9.55507e+07	2.47737e+08	1.11534e+08	1.51131e+08	3.6631e+07	4.49866e+07	5.1283e+07	1.045e+08	9.96739e+07	6.16259e+07
XMW0001	Cyclohexanol	2.29341e+06	1.51039e+06	2.05106e+06	417708	526339	691764	1.41336e+06	1.76213e+06	2.01438e+06	1.46368e+06	1.23828e+06	1.50062e+06	888434	894662	766062	1.877e+06	1.71551e+06	1.48115e+06	1.43142e+06	1.88051e+06	1.27433e+06
XMW1042	2(3H)-Naphthalenone, 4,4a,5,6,7,8-hexahydro-4a,5-dimethyl-3-(1-methylethylidene)-, (4ar-cis)-	1.40992e+06	1.59166e+06	1.49849e+06	821521	760881	792615	2.24827e+06	1.32018e+06	1.24746e+06	2.08993e+08	1.28443e+08	1.94878e+08	1.27084e+08	7.08106e+07	1.0797e+08	5.56239e+07	1.60915e+08	6.95204e+07	5.88481e+07	5.52666e+07	2.58919e+07
XMW0087	1-Pentanone, 1-(p-anisyl)-3-methyl-	1.00161e+06	1.88888e+06	1.41127e+06	779374	2.08028e+06	1.70421e+06	1.44786e+06	1.99536e+06	1.27302e+06	994759	595323	391387	892906	645804	979567	899058	908814	784816	1.48509e+06	1.01323e+06	672430
XMW0743	(-)-Aristolene	1.02065e+06	1.11467e+06	1.41438e+06	312181	400833	1.25352e+06	1.70741e+06	1.31685e+06	1.44338e+06	3.78563e+07	2.75061e+07	2.52067e+07	3.02356e+07	2.67665e+07	2.73807e+07	1.36036e+07	1.72018e+07	1.45476e+07	1.26502e+07	1.01048e+07	9.06128e+06
KMW0555	trans-.alpha.-Bergamotene	1	1	1	1	1	1	1.3428e+06	2.12382e+06	810329	3.79996e+06	3.47484e+06	4.57959e+06	1.07891e+08	4.82103e+07	6.86051e+07	1.79878e+07	1.98033e+07	2.54717e+07	4.00053e+07	3.75748e+07	2.49984e+07
XMW1140	2-methyl-5-propan-2-ylcyclohexa-2,5-diene-1,4-dione	319969	351752	1	4.96208e+06	9.70138e+06	7.91092e+06	1.30908e+06	1.68265e+06	1.27415e+06	1	1	1	1	1	1	1	1	1	1.97441e+06	1.94702e+06	1.48911e+06
XMW0852	l-Alanine, N-(2,3,4-trifluorobenzoyl)-, methyl ester	462466	1.07804e+06	801731	1.35489e+06	1.84683e+06	1.56893e+06	2.03033e+06	880038	1.32703e+06	664209	435311	418382	3.74835e+06	1.27117e+06	1.85615e+06	296740	415196	534675	2.03077e+06	1.77696e+06	1.12169e+06
KMW0622	Cyclohexene, 3-(1,5-dimethyl-4-hexenyl)-6-methylene-, [S-(R*,S*)]-	619572	657134	772513	1.50986e+06	2.8463e+06	1.72915e+06	1.14712e+06	613586	2.23619e+06	1.1176e+07	8.38971e+06	4.25083e+06	3.84737e+07	4.21447e+07	5.20038e+07	1.44396e+07	2.05378e+07	2.16352e+07	2.21733e+07	2.30795e+07	1.5709e+07
XMW0739	1-Hexen, 2-(p-anisyl)-5-methyl-	1	1	1	1	1	1	1.43473e+06	1.09789e+06	1.31258e+06	4.55536e+06	3.80381e+06	7.32808e+06	2.55578e+06	2.71023e+06	3.3564e+06	1.6615e+06	3.81268e+06	1.86202e+06	1.57886e+06	1.82235e+06	940261
XMW1029	Longipinocarvone	299410	230117	285671	135080	286630	223955	1.71886e+06	1.26503e+06	428951	1.0979e+08	4.9836e+07	5.06455e+07	7.78064e+07	7.30279e+07	1.03306e+08	3.3261e+07	4.5324e+07	3.803e+07	3.68959e+07	3.17509e+07	1.78252e+07
XMW1109	Glutaric acid, 2-methylpent-3-yl propyl ester	1.0528e+06	1.24548e+06	923184	799992	968449	911181	1.35583e+06	1.0664e+06	666188	2.21474e+07	1.40165e+07	9.64467e+06	9.43257e+06	1.19848e+07	1.38964e+07	9.09733e+06	1.34346e+07	1.06101e+07	1.0071e+07	9.50779e+06	7.67538e+06
KMW0095	2-Hexenal	1.04501e+06	1.22811e+06	1.27518e+06	803052	1.06451e+06	955438	631289	793106	964051	826064	653639	515399	1.2616e+06	1.01446e+06	788003	1.27867e+06	1.15525e+06	957408	980766	1.81636e+06	1.47768e+06
WMW0031	Phenanthrene, 7-ethenyl-1,2,3,4,4a,4b,5,6,7,9,10,10a-dodecahydro-1,1,4a,7-tetramethyl-, [4aS-(4a.alpha.,4b.beta.,7.beta.,10a.beta.)]-	46344.6	81170.5	96763.5	195007	86944.5	269164	779537	642684	854027	245029	161242	136548	3.11588e+06	2.61767e+06	2.85594e+06	696597	1.2614e+06	690964	833975	770118	733425
XMW0349	Isolongifolen-5-one	1.36326e+06	1.21636e+06	972816	476456	482327	384855	910700	815575	417941	2.09695e+08	1.26188e+08	8.85184e+07	6.51419e+07	7.66645e+07	8.87137e+07	5.51218e+07	8.86594e+07	6.56925e+07	6.62001e+07	5.93799e+07	3.03449e+07
XMW0357	5-Amino-2-methyl-2H-tetrazole	1.32093e+06	1.40507e+06	1.76141e+06	2.09101e+06	2.29745e+06	1.25859e+06	937842	444107	635814	3.42706e+06	1.69161e+06	1.77799e+06	7.6685e+06	2.60873e+06	4.4368e+06	1.96943e+06	2.62787e+06	2.71578e+06	3.12936e+06	3.10069e+06	2.01429e+06
XMW0042	3H-1,2,4-Triazol-3-one, 1,2-dihydro-	5.57667e+08	3.26995e+08	2.42958e+08	1	1	1	760949	720001	492486	900680	353636	480598	692900	519118	523297	1.16009e+06	1.16229e+06	1.02995e+06	2.05451e+08	1.95714e+08	1.43788e+08
XMW0921	1-Pentanone, 1-(2-thienyl)-	590750	1.05557e+06	683472	1.20248e+06	1.43199e+06	1.28893e+06	712064	380043	768185	2.11467e+06	1.18119e+06	918430	1.27667e+06	1.30075e+06	1.51649e+06	678884	857286	668669	1.25919e+06	1.49405e+06	644283
XMW0083	2H-Cyclopropa[a]naphthalen-2-one, 1,1a,4,5,6,7,7a,7b-octahydro-1,1,7,7a-tetramethyl-, (1a.alpha.,7.alpha.,7a.alpha.,7b.alpha.)-	807339	827768	755431	288041	357416	409795	777387	462421	340210	1.26588e+08	5.20142e+07	4.85313e+07	6.67398e+07	4.12109e+07	6.18113e+07	2.588e+07	3.25431e+07	2.92095e+07	2.99143e+07	2.64921e+07	1.15294e+07
XMW0863	7-Acetyl-2-hydroxy-2-methyl-5-isopropylbicyclo[4.3.0]nonane	108637	210571	198439	227284	606625	246065	645829	587936	309595	3.77453e+06	2.04993e+06	3.09175e+06	7.01213e+06	5.82838e+06	8.33764e+06	4.20192e+06	1.12755e+07	4.65338e+06	2.73627e+06	3.4927e+06	1.85583e+06
KMW0610	Bornyl isovalerate	1.0502e+07	1.48475e+07	1.64965e+07	432021	562109	498440	451112	397677	371890	3.52466e+07	1.583e+07	1.45909e+07	1.85051e+07	1.48522e+07	1.86906e+07	1.34033e+07	1.72707e+07	1.53736e+07	1.63195e+07	1.59656e+07	7.94911e+06
XMW0148	1H-Tetrazol-5-amine	366928	303423	551068	465842	705991	1.24349e+06	564680	604560	1	5.14134e+06	2.58287e+06	3.13966e+06	4.72017e+06	3.63911e+06	3.7531e+06	5.0889e+06	3.89745e+06	4.33999e+06	2.87899e+06	2.73278e+06	2.62826e+06
NMW0321	(Z)-3-Butylidene-4,5-dihydroisobenzofuran-1(3H)-one	616699	565975	636228	166019	185037	254704	550313	316279	261193	1.48874e+08	6.32811e+07	6.17512e+07	8.12125e+07	5.13958e+07	7.17425e+07	3.46576e+07	4.10212e+07	3.69053e+07	3.49323e+07	3.21651e+07	1.42095e+07
KMW0050	2-Pentenal, (E)-	587515	556891	786784	180397	265144	347998	349281	316973	355883	639023	585489	364535	162371	209100	199002	440211	386377	353012	381186	420942	355531
NMW0438	Methoxsalen	170393	214136	200213	1	1	1	174422	112775	102143	2.8318e+07	1.36991e+07	2.59331e+07	1.60514e+07	8.84751e+06	9.55179e+06	8.93311e+06	2.24042e+07	1.06754e+07	8.90934e+06	6.33757e+06	5.03391e+06
WMW0006	(3aR,4R,7R)-1,4,9,9-Tetramethyl-3,4,5,6,7,8-hexahydro-2H-3a,7-methanoazulen-2-one	156233	171534	212049	78790.4	95845.3	84795.8	158314	114625	109952	1.76563e+06	1.06334e+06	1.59076e+06	3.1175e+06	2.45851e+06	3.04951e+06	2.64186e+06	5.64118e+06	2.21422e+06	1.57057e+06	1.82945e+06	730339
NMW0467	4,4'-Ethylidenediphenol	186948	205484	148166	1	1	1	105208	80179.5	47267.4	1.57309e+07	8.67055e+06	1.3311e+07	5.99519e+06	5.38509e+06	6.30866e+06	6.04022e+06	1.82135e+07	5.04906e+06	4.84524e+06	4.18399e+06	2.47164e+06
KMW0101	Butanoic acid, 2-methyl-	6.97732e+06	6.30651e+06	7.70874e+06	1	1	1	1	1	1	1	1	1	1	1	1	1	1	1	3.21984e+06	6.2932e+06	5.90256e+06
KMW0591	Butanoic acid, 1,7,7-trimethylbicyclo[2.2.1]hept-2-yl ester, endo-	8.88375e+06	9.89529e+06	1.23534e+07	668964	749026	691213	1	1	1	1.17655e+07	5.74413e+06	7.26375e+06	2.6079e+07	8.29583e+06	1.19078e+07	8.50309e+06	1.00962e+07	1.03596e+07	1.26129e+07	1.23425e+07	1.48999e+07
XMW0178	Acetic acid, (1,2,3,4,5,6,7,8-octahydro-3,8,8-trimethylnaphth-2-yl)methyl ester	1	1	1	1	1	1	1	1	1	9.97022e+06	8.1091e+06	5.91671e+06	1.17796e+07	1.3016e+07	1.46829e+07	1.12862e+07	2.74995e+07	1.00806e+07	5.47797e+06	7.08551e+06	4.81748e+06
XMW0227	aR-Himachalene	1	1	1	1	1	1	1	1	1	1.07471e+07	6.76351e+06	5.32731e+06	5.81761e+06	5.86526e+06	6.23378e+06	3.29625e+06	4.02593e+06	3.90878e+06	4.49477e+06	3.43119e+06	2.42326e+06
XMW0060	.alpha.-Dehydro-ar-himachalene	155214	278155	181976	249582	347782	417352	1	1	1	2.13115e+07	8.40704e+06	9.98288e+06	9.1427e+06	7.38632e+06	9.03025e+06	3.93078e+06	5.58545e+06	5.11844e+06	6.7507e+06	4.69907e+06	2.74499e+06
XMW0340	Cyclohexane, 1,1,3-trimethyl-2,3-epoxy-2-(3-methylcyclobuten-2-yl-1)-4-acetyloxy-	1	1	1	1	1	1	1	1	1	1.21986e+07	1.68291e+07	9.8914e+06	1.36962e+07	2.06544e+07	1.54107e+07	1.19103e+07	1.94335e+07	1.23846e+07	4.90031e+06	9.04812e+06	4.70949e+06
WMW0194	Thujone	1.2432e+08	5.43028e+07	4.48195e+07	1	1	1	1	1	1	1	1	1	341913	248761	384221	1.15066e+06	1.22743e+06	963882	2.62975e+07	2.33024e+07	1.93357e+07
XMW0426	Phytol, acetate	423468	645538	955482	1.12475e+06	1.73458e+06	1.67537e+06	1	1	1	945245	1.2833e+06	440681	734577	1.17834e+06	1.41043e+06	1	1	1	641743	936243	538128
XMW0455	1,3-Benzenediol, 4,5-dimethyl-	1	1	1	2.10151e+06	4.46011e+06	3.55632e+06	1	1	1	1	1	1	190030	154097	198904	203572	263661	183472	1.02738e+06	560298	604916
XMW0520	Nitroguanidine	2.32487e+06	2.27793e+06	2.6461e+06	1	1	1	1	1	1	197553	129598	113609	196689	133698	201521	239559	278839	247998	3.58986e+06	3.7313e+06	2.80496e+06
XMW0633	Ethyl 4-(ethyloxy)-2-oxobut-3-enoate	496575	762267	873992	1	1	1	1	1	1	246038	203963	145502	1	1	1	1	1	1	503578	593770	487416
NMW0048	Dextroamphetamine	3.89148e+07	3.6419e+07	3.87262e+07	6.68123e+07	7.48553e+07	7.89117e+07	1	1	1	5.39722e+06	3.06391e+06	3.35008e+06	1.84028e+07	1.53856e+07	1.7461e+07	2.49162e+07	2.15654e+07	2.47157e+07	8.98205e+07	8.57814e+07	5.40039e+07
NMW0318	Curcumenol	1	1	1	1	1	1	1	1	1	7.45973e+06	6.08461e+06	9.52886e+06	4.31693e+06	4.61503e+06	6.25025e+06	3.59667e+06	6.32632e+06	3.99693e+06	3.43018e+06	2.66753e+06	1.38073e+06
XMW0974	1,2,4-Methenoazulene, decahydro-1,5,5,8a-tetramethyl-, [1S-(1.alpha.,2.alpha.,3a.beta.,4.alpha.,8a.beta.,9R*)]-	1.4923e+07	1.97446e+07	7.93234e+06	4.18937e+06	6.26007e+06	5.52687e+06	1	1	1	7.07004e+06	2.86828e+06	3.98576e+06	1.07988e+07	3.18298e+06	5.13481e+06	3.53721e+06	3.93892e+06	4.17019e+06	8.55316e+06	8.26385e+06	8.56631e+06
XMW0987	Eudesma-2,4,11-triene	1	1	1	1	1	1	1	1	1	4.25597e+07	1.18881e+07	1.56838e+07	1.73765e+07	1.10298e+07	1.80869e+07	8.92989e+06	9.62971e+06	1.11583e+07	1.1072e+07	1.04677e+07	7.89776e+06
XMW0997	Bornyl tiglate	4.35688e+06	5.58508e+06	5.78982e+06	1	1	1	1	1	1	1.6702e+08	9.57948e+07	9.19166e+07	8.77898e+07	6.28969e+07	9.84347e+07	5.21169e+07	6.60385e+07	5.05511e+07	4.9914e+07	5.25488e+07	2.70226e+07
